# Supplementary material for: Symbiodinium Transcriptomes: Genome Insights into the Dinoflagellate Symbionts of Reef-Building Corals
Source: PLoS One. 2012 Apr 18;7(4):e35269. doi: 10.1371/journal.pone.0035269 (PMC3329448; doi:10.1371/journal.pone.0035269)
Supplement: Table S1 — Cluster numbers and contigs and singlets contained in the clusters. (XLS) [file pone.0035269.s002.xls]

## Sheet: CassKB8
0	kb8_rep_c1	kb8_rep_c6478	kb8_rep_c24484	kb8_rep_c42157	kb8_rep_c47710	kb8_rep_c50727	kb8_s51273	kb8_rep_c51999	kb8_s54777	kb8_s56759	kb8_s58289	kb8_s64660	kb8_s65405	kb8_s67080	kb8_s70575	kb8_s72020
1	kb8_rep_c2	kb8_rep_c18640	kb8_rep_c28137	kb8_rep_c32205	kb8_rep_c33148	kb8_rep_c51335	kb8_rep_c51838	kb8_rep_c53042	kb8_s53392	kb8_rep_c55030	kb8_s55039	kb8_rep_c56202	kb8_rep_c56682	kb8_s58105	kb8_rep_c61164	kb8_rep_c61998	kb8_rep_c64211	kb8_s64985	kb8_s66315	kb8_s66661
2	kb8_rep_c3	kb8_rep_c31720	kb8_rep_c32274	kb8_rep_c52621	kb8_rep_c53293	kb8_rep_c59923	kb8_s60649
3	kb8_rep_c4	kb8_rep_c2990	kb8_rep_c17212	kb8_rep_c18024	kb8_rep_c36331	kb8_s37849	kb8_rep_c39398	kb8_rep_c42217	kb8_s55402	kb8_s61594
4	kb8_rep_c5	kb8_rep_c30228	kb8_rep_c51230	kb8_rep_c51260	kb8_s52270	kb8_rep_c52802	kb8_s57062	kb8_rep_c57391	kb8_s61140	kb8_s62986	kb8_s63231	kb8_s67180
5	kb8_rep_c6	kb8_rep_c22146	kb8_rep_c42764	kb8_rep_c53262
6	kb8_rep_c7	kb8_rep_c42896	kb8_rep_c51245	kb8_rep_c52041	kb8_rep_c52547	kb8_s54040	kb8_rep_c54917	kb8_s56177	kb8_s59185	kb8_s60733	kb8_rep_c64508	kb8_s65584	kb8_s66614
7	kb8_rep_c8	kb8_rep_c43971	kb8_s52135	kb8_rep_c55741	kb8_s67181
8	kb8_rep_c9	kb8_rep_c47901
9	kb8_rep_c10	kb8_s52367	kb8_rep_c56995
10	kb8_rep_c11	kb8_rep_c239	kb8_rep_c4893	kb8_rep_c13793	kb8_rep_c20668	kb8_rep_c28619	kb8_rep_c54474	kb8_rep_c55370	kb8_s62629	kb8_s63119	kb8_s64460	kb8_s64461	kb8_rep_c68195	kb8_rep_c68587
12	kb8_rep_c13	kb8_rep_c46680	kb8_s54833	kb8_s56079
13	kb8_rep_c14	kb8_rep_c375	kb8_rep_c8196	kb8_rep_c53518	kb8_s60129
14	kb8_rep_c15	kb8_rep_c33467	kb8_s62063	kb8_s68404
15	kb8_rep_c16	kb8_s58371
16	kb8_rep_c17	kb8_s68949
17	kb8_rep_c18	kb8_rep_c28350	kb8_rep_c42589	kb8_s59332	kb8_s70818
18	kb8_rep_c19	kb8_rep_c41034	kb8_s51835
20	kb8_rep_c21	kb8_rep_c43084	kb8_s61075	kb8_rep_c65301
21	kb8_rep_c22	kb8_s69750
23	kb8_rep_c24	kb8_s59519
25	kb8_rep_c26	kb8_rep_c25697	kb8_rep_c40768	kb8_rep_c47066	kb8_s61876	kb8_s63007	kb8_s64757	kb8_s64805
26	kb8_rep_c27	kb8_rep_c27230	kb8_rep_c59998	kb8_s65843	kb8_s66684
27	kb8_rep_c28	kb8_rep_c116	kb8_rep_c10370	kb8_rep_c34706
28	kb8_rep_c29	kb8_rep_c2684	kb8_rep_c10223	kb8_rep_c36070	kb8_rep_c38430	kb8_rep_c51845	kb8_rep_c52197	kb8_s54440	kb8_s54625	kb8_rep_c56950	kb8_s57248	kb8_s58893	kb8_s61204	kb8_s61391	kb8_s65239	kb8_s65725	kb8_s66056	kb8_s66836	kb8_s67988
29	kb8_rep_c30	kb8_s51873	kb8_rep_c54809	kb8_s56171	kb8_s61325
30	kb8_rep_c31	kb8_s58739
32	kb8_rep_c33	kb8_rep_c2003	kb8_rep_c3326	kb8_rep_c12644	kb8_rep_c51536	kb8_s52218	kb8_rep_c53485	kb8_s53487	kb8_s55087	kb8_rep_c55262	kb8_s64699
33	kb8_rep_c34	kb8_rep_c15446
34	kb8_rep_c35	kb8_s61106
36	kb8_rep_c37	kb8_s58995	kb8_s67718	kb8_s69965
37	kb8_rep_c38	kb8_rep_c50692	kb8_s52482	kb8_s56918	kb8_s68481
38	kb8_rep_c39	kb8_rep_c50448	kb8_s58875
39	kb8_rep_c40	kb8_rep_c27756	kb8_s70424
41	kb8_rep_c42	kb8_rep_c50151
42	kb8_rep_c43	kb8_rep_c886	kb8_c7045	kb8_s54841
43	kb8_rep_c44	kb8_rep_c20106	kb8_rep_c24500	kb8_rep_c55261	kb8_s61036
45	kb8_rep_c46	kb8_rep_c43860	kb8_rep_c46928	kb8_s51950
46	kb8_rep_c47	kb8_s70391
47	kb8_rep_c48	kb8_rep_c45300	kb8_s52486	kb8_s57342	kb8_s57395	kb8_s63803	kb8_s70226
48	kb8_rep_c49	kb8_s56702	kb8_s65648
49	kb8_rep_c50	kb8_s55849	kb8_s65859	kb8_s68061	kb8_s72055
50	kb8_rep_c51	kb8_s57512	kb8_s60790	kb8_s70964
51	kb8_rep_c52	kb8_s68389
52	kb8_rep_c53	kb8_rep_c15203	kb8_rep_c27719	kb8_rep_c42850	kb8_rep_c51284	kb8_rep_c51682	kb8_s53196	kb8_s54551	kb8_s55052	kb8_rep_c58029	kb8_rep_c63246	kb8_s64509	kb8_s64720	kb8_rep_c64740	kb8_s66214	kb8_s66680	kb8_rep_c66887	kb8_s66986
53	kb8_rep_c54	kb8_rep_c55103
54	kb8_rep_c55	kb8_s58044	kb8_s60448	kb8_s63531	kb8_s66051
55	kb8_rep_c56	kb8_rep_c40515	kb8_s62527
56	kb8_rep_c57	kb8_rep_c55506	kb8_s55648	kb8_s57717	kb8_s63526	kb8_s66740	kb8_s67762
57	kb8_rep_c58	kb8_rep_c49398
59	kb8_rep_c60	kb8_s56651	kb8_s65870	kb8_s67900	kb8_s68694	kb8_s71532
60	kb8_rep_c61	kb8_rep_c20325	kb8_s69281
61	kb8_rep_c62	kb8_rep_c37261	kb8_rep_c50721
62	kb8_rep_c63	kb8_rep_c32143	kb8_rep_c57860	kb8_s69015
63	kb8_rep_c64	kb8_s51380	kb8_s59997
64	kb8_rep_c65	kb8_rep_c2513	kb8_rep_c6270
65	kb8_rep_c66	kb8_rep_c31365	kb8_s55944	kb8_s67288
66	kb8_rep_c67	kb8_s55728	kb8_s58918	kb8_s67822	kb8_s70890
67	kb8_rep_c68	kb8_rep_c6224	kb8_rep_c46893	kb8_c58890	kb8_s64435	kb8_s66923
68	kb8_rep_c69	kb8_rep_c48102	kb8_s58167	kb8_s61136
70	kb8_rep_c71	kb8_s48200	kb8_s52660	kb8_s56008
71	kb8_rep_c72	kb8_rep_c1115	kb8_s63329
72	kb8_rep_c73	kb8_s52421	kb8_rep_c54098
73	kb8_rep_c74	kb8_s67818
74	kb8_rep_c75	kb8_s57751	kb8_s60460
75	kb8_rep_c76	kb8_rep_c39961	kb8_rep_c50807	kb8_s53699	kb8_s70420
76	kb8_rep_c77	kb8_s60919
77	kb8_rep_c78	kb8_s55553	kb8_s56435	kb8_s64478
78	kb8_rep_c79	kb8_s42504	kb8_s68615	kb8_s70758
79	kb8_rep_c80	kb8_rep_c41848	kb8_rep_c47060
80	kb8_rep_c81	kb8_s52450	kb8_s67563
81	kb8_rep_c82	kb8_rep_c18138	kb8_rep_c32433	kb8_rep_c34979	kb8_rep_c46071
83	kb8_rep_c84	kb8_rep_c22089	kb8_s54955	kb8_s64394
85	kb8_rep_c86	kb8_rep_c16539	kb8_rep_c22445	kb8_s59972	kb8_s63871
86	kb8_rep_c87	kb8_rep_c45573	kb8_rep_c51082	kb8_s55680	kb8_s57304	kb8_s64876
88	kb8_rep_c89	kb8_s57250
90	kb8_rep_c91	kb8_rep_c48688	kb8_s56748	kb8_s58042	kb8_s60583
91	kb8_rep_c92	kb8_s52425
92	kb8_rep_c93	kb8_rep_c39571	kb8_s61590	kb8_s65709	kb8_s71607
93	kb8_rep_c94	kb8_s55532
94	kb8_rep_c95	kb8_rep_c15703	kb8_c52182	kb8_rep_c56056	kb8_s64088
95	kb8_rep_c96	kb8_s54748
97	kb8_rep_c98	kb8_rep_c48691	kb8_s58957	kb8_s64413	kb8_s68967
98	kb8_rep_c99	kb8_rep_c24112	kb8_rep_c45905
100	kb8_rep_c101	kb8_rep_c45825	kb8_s58207
102	kb8_rep_c103	kb8_rep_c52821
104	kb8_rep_c105	kb8_s57009	kb8_rep_c57294
105	kb8_rep_c106	kb8_rep_c48909	kb8_s58218	kb8_s62225
106	kb8_rep_c107	kb8_rep_c24451	kb8_rep_c41741	kb8_rep_c42338	kb8_s66345
107	kb8_rep_c108	kb8_s64631	kb8_s69435
108	kb8_rep_c109	kb8_rep_c48082	kb8_s57188
111	kb8_rep_c112	kb8_s52047
112	kb8_rep_c113	kb8_s52756
113	kb8_rep_c114	kb8_rep_c9400
115	kb8_rep_c117	kb8_s55371	kb8_s63039
117	kb8_rep_c119	kb8_rep_c1806	kb8_rep_c8083	kb8_rep_c45786	kb8_s63750	kb8_s72059
118	kb8_rep_c120	kb8_rep_c3948	kb8_s59514	kb8_s68605
119	kb8_rep_c121	kb8_rep_c32992
120	kb8_rep_c122	kb8_s61986
121	kb8_rep_c123	kb8_s59006	kb8_s68827
122	kb8_rep_c124	kb8_rep_c45523	kb8_s59264	kb8_s63268
123	kb8_rep_c125	kb8_rep_c47161
124	kb8_rep_c126	kb8_rep_c45063	kb8_s54057
125	kb8_rep_c127	kb8_rep_c37804	kb8_s52394	kb8_s70007
126	kb8_rep_c128	kb8_s65296
128	kb8_rep_c130	kb8_s63770	kb8_s70645
130	kb8_rep_c132	kb8_rep_c34490	kb8_rep_c39839	kb8_s55042	kb8_s62847	kb8_s70680
132	kb8_rep_c134	kb8_s57038	kb8_s64004
133	kb8_rep_c135	kb8_s67384	kb8_s68319
134	kb8_rep_c136	kb8_rep_c5044	kb8_s56049
135	kb8_rep_c137	kb8_s52239	kb8_s59095	kb8_s65539
137	kb8_rep_c139	kb8_rep_c36233	kb8_s57821	kb8_s66023
138	kb8_rep_c140	kb8_rep_c44118	kb8_s66128
139	kb8_rep_c141	kb8_s56084	kb8_s57266
140	kb8_rep_c142	kb8_rep_c1158
142	kb8_rep_c144	kb8_rep_c45373
143	kb8_rep_c145	kb8_rep_c1356
144	kb8_rep_c146	kb8_s53368
145	kb8_rep_c147	kb8_s67316
146	kb8_rep_c148	kb8_s56512	kb8_s67348
147	kb8_rep_c149	kb8_rep_c35868	kb8_s67442
148	kb8_rep_c150	kb8_s52678
149	kb8_rep_c151	kb8_rep_c1219	kb8_rep_c2777	kb8_s67794
150	kb8_rep_c152	kb8_rep_c1317	kb8_rep_c30156	kb8_s51330	kb8_s66701
151	kb8_rep_c153	kb8_s57719	kb8_s61335
152	kb8_rep_c154	kb8_s52129	kb8_s60627	kb8_s60646
153	kb8_rep_c155	kb8_s62558
154	kb8_rep_c156	kb8_s60901	kb8_s69325
156	kb8_rep_c158	kb8_s55827	kb8_s61416
157	kb8_rep_c159	kb8_s57199
158	kb8_rep_c160	kb8_s68856
159	kb8_rep_c161	kb8_s66277
160	kb8_rep_c162	kb8_s55913
161	kb8_rep_c163	kb8_rep_c28326
162	kb8_rep_c164	kb8_s69566
163	kb8_rep_c165	kb8_rep_c467	kb8_rep_c27909	kb8_s62690
164	kb8_rep_c166	kb8_rep_c35733	kb8_s61382
165	kb8_rep_c167	kb8_rep_c50511	kb8_s53024	kb8_s57972
166	kb8_rep_c168	kb8_rep_c20369	kb8_s71659
167	kb8_rep_c169	kb8_s63684
168	kb8_rep_c170	kb8_rep_c30569
172	kb8_rep_c174	kb8_s56543
174	kb8_rep_c176	kb8_rep_c28422	kb8_s54591	kb8_s61749
175	kb8_rep_c177	kb8_rep_c44239
176	kb8_rep_c178	kb8_rep_c47152	kb8_s55110	kb8_s66573
178	kb8_rep_c180	kb8_s70344
179	kb8_rep_c181	kb8_rep_c39490	kb8_rep_c40718	kb8_s66216	kb8_s69642
180	kb8_rep_c182	kb8_rep_c11472	kb8_rep_c12336	kb8_rep_c54441	kb8_s72095
181	kb8_rep_c183	kb8_rep_c51727	kb8_s56802
182	kb8_rep_c184	kb8_s59510	kb8_s61687	kb8_s69277
183	kb8_rep_c185	kb8_s64442
184	kb8_rep_c186	kb8_rep_c35985	kb8_s68298
185	kb8_rep_c187	kb8_rep_c33945	kb8_rep_c53426	kb8_s56762	kb8_s69951
186	kb8_rep_c188	kb8_rep_c43120	kb8_s60612
187	kb8_rep_c189	kb8_rep_c31830	kb8_s65367	kb8_s70902
188	kb8_rep_c190	kb8_s63105
189	kb8_rep_c191	kb8_rep_c5952	kb8_rep_c44824	kb8_s70223
191	kb8_rep_c193	kb8_s57756
193	kb8_rep_c195	kb8_rep_c27119
196	kb8_rep_c198	kb8_rep_c15169	kb8_c42966	kb8_rep_c53622	kb8_s53670	kb8_s57678
197	kb8_rep_c199	kb8_rep_c12318
198	kb8_rep_c200	kb8_rep_c39234	kb8_s60787	kb8_s64782	kb8_s71391
199	kb8_rep_c201	kb8_s56380
200	kb8_rep_c202	kb8_rep_c3469	kb8_rep_c45556	kb8_s52684	kb8_s60550	kb8_s61188	kb8_s63845	kb8_s64175	kb8_rep_c67496	kb8_s68226	kb8_s69120	kb8_s70251
201	kb8_rep_c203	kb8_s55307	kb8_s56488
202	kb8_rep_c204	kb8_s55560	kb8_s64524
203	kb8_rep_c205	kb8_s57139	kb8_s65282
204	kb8_rep_c206	kb8_rep_c44531
206	kb8_rep_c208	kb8_s58383
207	kb8_rep_c209	kb8_rep_c5588	kb8_s69571
211	kb8_rep_c213	kb8_rep_c51505	kb8_rep_c59152
212	kb8_rep_c214	kb8_rep_c22878	kb8_s51319	kb8_s51496	kb8_rep_c51513	kb8_s62391
213	kb8_rep_c215	kb8_rep_c11867
214	kb8_rep_c216	kb8_s55217	kb8_s70373
215	kb8_rep_c217	kb8_rep_c34562	kb8_rep_c52309	kb8_rep_c54932
216	kb8_rep_c218	kb8_s61598	kb8_s65217	kb8_s68622
217	kb8_rep_c219	kb8_s64106	kb8_s68898
218	kb8_rep_c220	kb8_s53015
219	kb8_rep_c221	kb8_s70686
220	kb8_rep_c222	kb8_s55522	kb8_s55945
222	kb8_rep_c224	kb8_rep_c18935
224	kb8_rep_c226	kb8_s52107
226	kb8_rep_c228	kb8_s66294
228	kb8_rep_c230	kb8_s53143	kb8_s62676	kb8_s63954
229	kb8_rep_c231	kb8_rep_c1374	kb8_rep_c22689	kb8_rep_c42831	kb8_s60449	kb8_s63707	kb8_s64414	kb8_s67318	kb8_s71145	kb8_s71328
233	kb8_rep_c235	kb8_rep_c39432	kb8_s54816
234	kb8_rep_c236	kb8_s62059	kb8_s64847	kb8_s68835
237	kb8_rep_c240	kb8_rep_c58648	kb8_s63035	kb8_s64053
238	kb8_rep_c241	kb8_s61132
239	kb8_rep_c242	kb8_s64254
240	kb8_rep_c243	kb8_s55853	kb8_s62736	kb8_s69147
241	kb8_rep_c244	kb8_s52857	kb8_s66917
242	kb8_rep_c245	kb8_rep_c54321
245	kb8_rep_c248	kb8_s70187
246	kb8_rep_c249	kb8_c50344	kb8_s60766
248	kb8_rep_c251	kb8_s55890	kb8_s67143	kb8_s70639
249	kb8_rep_c252	kb8_s60011
250	kb8_rep_c253	kb8_s51680	kb8_s66780
253	kb8_rep_c256	kb8_s71136
254	kb8_rep_c257	kb8_s53317	kb8_s56523
255	kb8_rep_c258	kb8_rep_c9497	kb8_rep_c11994
257	kb8_rep_c260	kb8_rep_c48569
258	kb8_rep_c261	kb8_s64943
259	kb8_rep_c262	kb8_s69161
260	kb8_rep_c263	kb8_s63955	kb8_s71896	kb8_s71986
262	kb8_rep_c265	kb8_s59918	kb8_s65427
263	kb8_rep_c266	kb8_s54381	kb8_s64397
264	kb8_rep_c267	kb8_s56320
265	kb8_rep_c268	kb8_s57973
266	kb8_rep_c269	kb8_s60356	kb8_s62157
267	kb8_rep_c270	kb8_rep_c53804	kb8_s66603
268	kb8_rep_c271	kb8_s66905
269	kb8_rep_c272	kb8_s69354
272	kb8_rep_c275	kb8_rep_c41927
273	kb8_rep_c276	kb8_rep_c45299	kb8_s52599
274	kb8_rep_c277	kb8_rep_c9983	kb8_rep_c17024	kb8_rep_c53822	kb8_s55102	kb8_rep_c55122	kb8_rep_c58795	kb8_s68043	kb8_rep_c69799
275	kb8_rep_c278	kb8_s69437
276	kb8_rep_c279	kb8_s66533
277	kb8_rep_c280	kb8_s68983
278	kb8_rep_c281	kb8_s59184
279	kb8_rep_c282	kb8_s56779
280	kb8_rep_c283	kb8_s71075
281	kb8_rep_c284	kb8_rep_c25125
282	kb8_rep_c285	kb8_rep_c25996	kb8_rep_c57985	kb8_s63543
284	kb8_rep_c287	kb8_rep_c18393	kb8_s61496	kb8_s67763	kb8_s68136	kb8_s68700
286	kb8_rep_c289	kb8_rep_c46170
287	kb8_rep_c290	kb8_rep_c4572	kb8_rep_c18316	kb8_rep_c34629	kb8_rep_c51236	kb8_rep_c51377	kb8_rep_c52300	kb8_s55656	kb8_s61319	kb8_s64735
289	kb8_rep_c292	kb8_s71234
291	kb8_rep_c294	kb8_rep_c55897	kb8_s58348
293	kb8_rep_c296	kb8_s57374
297	kb8_rep_c300	kb8_rep_c50206
298	kb8_rep_c301	kb8_s61801	kb8_s63958
299	kb8_rep_c302	kb8_rep_c35422	kb8_s56694	kb8_s65916	kb8_s68145	kb8_s69132
300	kb8_rep_c303	kb8_s70355
303	kb8_rep_c306	kb8_rep_c46753
304	kb8_rep_c307	kb8_rep_c3192	kb8_s51409	kb8_s52748	kb8_s70797
305	kb8_rep_c308	kb8_s51435	kb8_s67135	kb8_s67646
306	kb8_rep_c309	kb8_rep_c5555	kb8_s55037	kb8_s60260	kb8_s69588
307	kb8_rep_c310	kb8_rep_c34322
309	kb8_rep_c312	kb8_rep_c40673
310	kb8_rep_c313	kb8_s58488
311	kb8_rep_c314	kb8_rep_c39944	kb8_rep_c50390	kb8_s64292
312	kb8_rep_c315	kb8_s68334
314	kb8_rep_c317	kb8_rep_c28732	kb8_s53973
315	kb8_rep_c318	kb8_s70175
317	kb8_rep_c320	kb8_rep_c44931
318	kb8_rep_c321	kb8_rep_c56413
319	kb8_rep_c322	kb8_rep_c47185
322	kb8_rep_c325	kb8_s65304
325	kb8_rep_c328	kb8_s54495
328	kb8_rep_c331	kb8_rep_c28775	kb8_rep_c43316	kb8_s59469	kb8_s60723
330	kb8_rep_c333	kb8_s53982
333	kb8_rep_c336	kb8_s68408
334	kb8_rep_c337	kb8_s59442
335	kb8_rep_c338	kb8_rep_c8588	kb8_rep_c43756	kb8_s51468	kb8_s63431	kb8_s65247	kb8_s70583
336	kb8_rep_c339	kb8_rep_c20636	kb8_rep_c50196	kb8_s71426
337	kb8_rep_c340	kb8_s58063
338	kb8_rep_c341	kb8_rep_c43291	kb8_s59989
340	kb8_rep_c343	kb8_s54504	kb8_s62378
341	kb8_rep_c344	kb8_c56120	kb8_s56154	kb8_s59484	kb8_s63772	kb8_s67891	kb8_s68065	kb8_s69093
342	kb8_rep_c345	kb8_s54337
343	kb8_rep_c346	kb8_rep_c46726
344	kb8_rep_c347	kb8_rep_c51084
345	kb8_rep_c348	kb8_s53666
346	kb8_rep_c349	kb8_rep_c49454	kb8_s57377	kb8_s69880
347	kb8_rep_c350	kb8_rep_c43786	kb8_s58541	kb8_s58642
349	kb8_rep_c352	kb8_rep_c49320	kb8_s70815
350	kb8_rep_c353	kb8_rep_c47577
351	kb8_rep_c354	kb8_rep_c43785
352	kb8_rep_c355	kb8_s59412
353	kb8_rep_c356	kb8_rep_c25134	kb8_rep_c46172	kb8_s55734	kb8_s63168
354	kb8_rep_c357	kb8_s58993
356	kb8_rep_c359	kb8_rep_c29944	kb8_rep_c50059	kb8_s61946	kb8_s65789	kb8_s66879	kb8_s71092	kb8_s71407	kb8_s71517
357	kb8_rep_c360	kb8_rep_c47971	kb8_s60081
358	kb8_rep_c361	kb8_rep_c14781
359	kb8_rep_c362	kb8_s62592
360	kb8_rep_c363	kb8_s60086	kb8_s63823	kb8_s66798
362	kb8_rep_c365	kb8_s56552
363	kb8_rep_c366	kb8_s54960	kb8_s64832	kb8_s65279
364	kb8_rep_c367	kb8_s61055	kb8_s64058	kb8_s65969
365	kb8_rep_c368	kb8_rep_c2047	kb8_rep_c51772	kb8_s56419	kb8_s58682	kb8_s62228	kb8_s62536	kb8_s68666	kb8_s68822
367	kb8_rep_c370	kb8_rep_c46389	kb8_s55447	kb8_s65389	kb8_s65736	kb8_s67981
368	kb8_rep_c371	kb8_s54481
369	kb8_rep_c372	kb8_rep_c22483	kb8_s66325
371	kb8_rep_c374	kb8_rep_c20221	kb8_s62729
373	kb8_rep_c377	kb8_s57988
374	kb8_rep_c378	kb8_rep_c13442	kb8_rep_c21670	kb8_rep_c55961	kb8_s72094
375	kb8_rep_c379	kb8_s60272	kb8_s66694	kb8_s71935
378	kb8_rep_c382	kb8_rep_c58455
380	kb8_rep_c384	kb8_s70317
381	kb8_rep_c385	kb8_s65936
385	kb8_rep_c389	kb8_s54645
387	kb8_rep_c391	kb8_s63604	kb8_s64633
388	kb8_rep_c392	kb8_rep_c3916	kb8_c40675	kb8_rep_c52014
391	kb8_rep_c395	kb8_rep_c28786	kb8_s70649
394	kb8_rep_c398	kb8_rep_c18733	kb8_rep_c50847
395	kb8_rep_c399	kb8_s56656	kb8_s57909
396	kb8_rep_c400	kb8_rep_c46006	kb8_rep_c62906	kb8_s68111
397	kb8_rep_c401	kb8_s55497	kb8_s61997
398	kb8_rep_c402	kb8_s63858
399	kb8_rep_c403	kb8_s59206
400	kb8_rep_c404	kb8_s58007
401	kb8_rep_c405	kb8_s70657
402	kb8_rep_c406	kb8_rep_c14449	kb8_rep_c24571	kb8_rep_c30424	kb8_rep_c40424	kb8_rep_c53940	kb8_s57325	kb8_s57698	kb8_s60607	kb8_s60698	kb8_s61494	kb8_s64597	kb8_rep_c66964
403	kb8_rep_c407	kb8_rep_c37268
404	kb8_rep_c408	kb8_s45361
405	kb8_rep_c409	kb8_s64748
406	kb8_rep_c410	kb8_rep_c46592	kb8_s67191	kb8_s69596
407	kb8_rep_c411	kb8_s56414
409	kb8_rep_c413	kb8_s51461
410	kb8_rep_c414	kb8_s69375
411	kb8_rep_c415	kb8_s54598
413	kb8_rep_c417	kb8_rep_c8021	kb8_rep_c23189	kb8_rep_c32694	kb8_rep_c55176	kb8_s64602
414	kb8_rep_c418	kb8_s49638	kb8_s63513	kb8_s64693
415	kb8_rep_c419	kb8_rep_c18342	kb8_s56532	kb8_s56717	kb8_s61286
416	kb8_rep_c420	kb8_rep_c15439
417	kb8_rep_c421	kb8_s56410
418	kb8_rep_c422	kb8_s60089
421	kb8_rep_c425	kb8_rep_c31936	kb8_rep_c40501	kb8_rep_c51290	kb8_rep_c51600	kb8_rep_c53354	kb8_s58358	kb8_s64491
422	kb8_rep_c426	kb8_s69038	kb8_s71131
424	kb8_rep_c428	kb8_s52144	kb8_s65878	kb8_s68823
425	kb8_rep_c429	kb8_s56028	kb8_s67616
429	kb8_rep_c433	kb8_rep_c16190	kb8_rep_c36083	kb8_rep_c51222	kb8_s56255	kb8_s56665	kb8_s59150	kb8_s62443	kb8_s66177	kb8_s67264
432	kb8_rep_c436	kb8_s56813
433	kb8_rep_c437	kb8_rep_c13309	kb8_rep_c20577	kb8_rep_c52327	kb8_rep_c53012	kb8_rep_c53100	kb8_s53315	kb8_s60644
434	kb8_rep_c438	kb8_rep_c48809	kb8_s58618	kb8_s70279
435	kb8_rep_c439	kb8_rep_c58627	kb8_s58898	kb8_s71880
436	kb8_rep_c440	kb8_s54484
437	kb8_rep_c441	kb8_rep_c1604	kb8_s54178	kb8_s65646
438	kb8_rep_c442	kb8_s65605
439	kb8_rep_c443	kb8_s67511
441	kb8_rep_c445	kb8_s68843
443	kb8_rep_c447	kb8_s66897
445	kb8_rep_c449	kb8_s62281
446	kb8_rep_c450	kb8_rep_c1286	kb8_rep_c52456	kb8_s58511	kb8_s58842	kb8_s66646
450	kb8_rep_c454	kb8_rep_c27528	kb8_rep_c48681	kb8_s58921	kb8_rep_c61376	kb8_s65411
452	kb8_rep_c456	kb8_s67363
453	kb8_rep_c457	kb8_rep_c13807	kb8_s51963	kb8_s64343
455	kb8_rep_c459	kb8_rep_c3627
456	kb8_rep_c460	kb8_rep_c23363	kb8_s61078	kb8_s72100
457	kb8_rep_c461	kb8_s63331
458	kb8_rep_c462	kb8_rep_c49529	kb8_s59938	kb8_s66301
459	kb8_rep_c463	kb8_rep_c30047	kb8_s54699	kb8_s62460
460	kb8_rep_c464	kb8_s72040
462	kb8_rep_c466	kb8_rep_c16224	kb8_rep_c49332	kb8_s61516	kb8_s69537
463	kb8_rep_c468	kb8_rep_c46450	kb8_s66013
464	kb8_rep_c469	kb8_s62930
466	kb8_rep_c471	kb8_s60175	kb8_s65693
467	kb8_rep_c472	kb8_s65895
469	kb8_rep_c474	kb8_s54878	kb8_s70077
470	kb8_rep_c475	kb8_s59760
471	kb8_rep_c476	kb8_s60513
472	kb8_rep_c477	kb8_rep_c43010	kb8_s61475	kb8_s62753
473	kb8_rep_c478	kb8_rep_c44561
475	kb8_rep_c480	kb8_s57269	kb8_s62506	kb8_s72071
476	kb8_rep_c481	kb8_rep_c23677	kb8_s67021
479	kb8_rep_c484	kb8_rep_c39143	kb8_s56571
481	kb8_rep_c486	kb8_rep_c37600	kb8_rep_c51375	kb8_s55250	kb8_s56921	kb8_rep_c60331	kb8_s66382
484	kb8_rep_c489	kb8_rep_c47233	kb8_s60014	kb8_s65415	kb8_s66865	kb8_s68514
485	kb8_rep_c490	kb8_rep_c22723	kb8_s54035
486	kb8_rep_c491	kb8_s62277
488	kb8_rep_c493	kb8_s56153	kb8_s60883	kb8_s68733
490	kb8_rep_c495	kb8_s67906
492	kb8_rep_c497	kb8_s62927
493	kb8_rep_c498	kb8_s70463	kb8_s70607
496	kb8_rep_c501	kb8_rep_c17144	kb8_rep_c43512	kb8_s59046
497	kb8_rep_c502	kb8_s59136	kb8_s62593	kb8_s69955
498	kb8_rep_c503	kb8_s54928
500	kb8_rep_c505	kb8_s56290	kb8_s64536
501	kb8_rep_c506	kb8_s57173
502	kb8_rep_c507	kb8_s58953
504	kb8_rep_c509	kb8_s55558
505	kb8_rep_c510	kb8_rep_c9090	kb8_s53819	kb8_s61571	kb8_s61651	kb8_s61743
507	kb8_rep_c512	kb8_rep_c3051	kb8_rep_c14406	kb8_s70446	kb8_s71246
513	kb8_rep_c518	kb8_s55075
514	kb8_rep_c519	kb8_s45887	kb8_s69366
517	kb8_rep_c522	kb8_s53902
519	kb8_rep_c524	kb8_s69041	kb8_s69357
520	kb8_rep_c525	kb8_s69672
522	kb8_rep_c527	kb8_s60603
524	kb8_rep_c529	kb8_rep_c34434	kb8_rep_c49155	kb8_s65250
526	kb8_rep_c531	kb8_c59425	kb8_s60128	kb8_rep_c65924
527	kb8_rep_c532	kb8_rep_c1675	kb8_rep_c18715	kb8_rep_c26731	kb8_rep_c32319	kb8_rep_c43716	kb8_rep_c51341	kb8_rep_c51947	kb8_rep_c52349	kb8_rep_c52917	kb8_s53602	kb8_rep_c54786	kb8_rep_c56642	kb8_rep_c60508	kb8_s64273	kb8_rep_c64488	kb8_s66889	kb8_s67761	kb8_s69531
529	kb8_rep_c534	kb8_rep_c43819
532	kb8_rep_c537	kb8_rep_c47858	kb8_s51907
533	kb8_rep_c538	kb8_s53375	kb8_s56729
534	kb8_rep_c539	kb8_s64538
537	kb8_rep_c542	kb8_rep_c33523	kb8_s55427
539	kb8_rep_c544	kb8_rep_c13738	kb8_s68251
540	kb8_rep_c545	kb8_s65414
541	kb8_rep_c546	kb8_s61238
542	kb8_rep_c547	kb8_rep_c12876	kb8_rep_c38965	kb8_rep_c44863	kb8_s64372
545	kb8_rep_c550	kb8_s58659	kb8_s61015	kb8_s63426
546	kb8_rep_c551	kb8_rep_c10861	kb8_rep_c13317	kb8_rep_c19488	kb8_s66623	kb8_s72150
547	kb8_rep_c552	kb8_rep_c40987	kb8_s63743
548	kb8_rep_c553	kb8_s58343	kb8_s62972
549	kb8_rep_c554	kb8_rep_c59449
550	kb8_rep_c555	kb8_s63411	kb8_s68208
551	kb8_rep_c556	kb8_s59407
553	kb8_rep_c558	kb8_s57949	kb8_s61264	kb8_s71595
554	kb8_rep_c559	kb8_rep_c50892
555	kb8_rep_c560	kb8_s53884	kb8_s65152	kb8_s65929
556	kb8_rep_c561	kb8_rep_c18259	kb8_s62939	kb8_s71980
557	kb8_rep_c562	kb8_rep_c20851	kb8_s66226
558	kb8_rep_c563	kb8_rep_c40506
561	kb8_rep_c566	kb8_rep_c37345	kb8_rep_c48156	kb8_s51254	kb8_s60294	kb8_s63585	kb8_s71734
563	kb8_rep_c568	kb8_s60315	kb8_s71955
564	kb8_rep_c569	kb8_rep_c28755	kb8_s52624	kb8_s57563
565	kb8_rep_c570	kb8_s69150
566	kb8_rep_c571	kb8_s69619
568	kb8_rep_c573	kb8_rep_c28032	kb8_s55162
569	kb8_rep_c574	kb8_s66223
570	kb8_rep_c575	kb8_s62404
573	kb8_rep_c578	kb8_rep_c35809	kb8_s55653	kb8_s59019	kb8_s61445
574	kb8_rep_c579	kb8_s60191	kb8_s65987	kb8_s69808
575	kb8_rep_c580	kb8_s69480
576	kb8_rep_c581	kb8_rep_c6433	kb8_s60855	kb8_s64899	kb8_s68703
578	kb8_rep_c583	kb8_s70227
579	kb8_rep_c584	kb8_s69866
580	kb8_rep_c585	kb8_s53182
582	kb8_rep_c587	kb8_rep_c47087
583	kb8_rep_c588	kb8_s60525
584	kb8_rep_c589	kb8_rep_c7748	kb8_s60757	kb8_s66970
585	kb8_rep_c590	kb8_s54429	kb8_s60189
586	kb8_rep_c591	kb8_s66002
587	kb8_rep_c592	kb8_rep_c5186	kb8_rep_c11725	kb8_rep_c28246	kb8_rep_c45222	kb8_rep_c51623	kb8_rep_c52806	kb8_s67215
589	kb8_rep_c594	kb8_s53966	kb8_s57220
590	kb8_rep_c595	kb8_s52763
591	kb8_rep_c596	kb8_s61858	kb8_s66656
593	kb8_rep_c598	kb8_s69613
595	kb8_rep_c600	kb8_s55275	kb8_s61423
597	kb8_rep_c602	kb8_s66637	kb8_s68678
599	kb8_rep_c604	kb8_rep_c41888	kb8_s54758	kb8_s68785	kb8_s70972
601	kb8_rep_c606	kb8_s57042
602	kb8_rep_c607	kb8_rep_c7103	kb8_rep_c24119	kb8_rep_c43983	kb8_s51434
603	kb8_rep_c608	kb8_s57424
604	kb8_rep_c609	kb8_s59611
605	kb8_rep_c610	kb8_s58072	kb8_s68320	kb8_s70765
606	kb8_rep_c611	kb8_s70303
609	kb8_rep_c614	kb8_s54158	kb8_s70415
611	kb8_rep_c616	kb8_rep_c50354
612	kb8_rep_c617	kb8_c47824	kb8_s57772	kb8_s66972
615	kb8_rep_c620	kb8_rep_c57763
616	kb8_rep_c621	kb8_rep_c3176	kb8_s64329
617	kb8_rep_c622	kb8_rep_c29739	kb8_s51483	kb8_s68754
618	kb8_rep_c623	kb8_s57205
619	kb8_rep_c624	kb8_s63542	kb8_s68679
620	kb8_rep_c625	kb8_rep_c23342	kb8_s68824
621	kb8_rep_c626	kb8_rep_c32432	kb8_s55254	kb8_s59038
622	kb8_rep_c627	kb8_rep_c55830	kb8_s56697	kb8_s65538
623	kb8_rep_c628	kb8_s57963	kb8_s59008	kb8_s71833
628	kb8_rep_c633	kb8_s67228	kb8_s69504
630	kb8_rep_c635	kb8_s51373	kb8_s60479	kb8_s62544
632	kb8_rep_c637	kb8_s58336	kb8_s63474	kb8_s63769
633	kb8_rep_c638	kb8_rep_c35753	kb8_s67551
635	kb8_rep_c640	kb8_s61697
636	kb8_rep_c641	kb8_s62067	kb8_s63882	kb8_s64152	kb8_s66485
647	kb8_rep_c652	kb8_rep_c22984	kb8_rep_c38680
648	kb8_rep_c653	kb8_s54221
649	kb8_rep_c654	kb8_rep_c26835	kb8_rep_c29254	kb8_rep_c30516	kb8_rep_c37756	kb8_rep_c48342	kb8_rep_c52314	kb8_rep_c52354	kb8_rep_c53056	kb8_rep_c53175	kb8_rep_c53401	kb8_rep_c54067	kb8_rep_c54092	kb8_rep_c54127	kb8_rep_c54240	kb8_rep_c54950	kb8_rep_c55817	kb8_rep_c56726	kb8_rep_c57348	kb8_rep_c57655	kb8_rep_c58143	kb8_rep_c58632	kb8_rep_c59272	kb8_s60063	kb8_s60336	kb8_s65829	kb8_rep_c65869	kb8_s66346	kb8_s68934	kb8_s70726	kb8_s71394
650	kb8_rep_c655	kb8_rep_c5317	kb8_rep_c30238	kb8_rep_c48725	kb8_s64504	kb8_s67569
651	kb8_rep_c656	kb8_s55742	kb8_s67282
652	kb8_rep_c657	kb8_s69122
653	kb8_rep_c658	kb8_s70050
654	kb8_rep_c659	kb8_s68880	kb8_s70532	kb8_s70794
656	kb8_rep_c661	kb8_s68799
657	kb8_rep_c662	kb8_s56569	kb8_s72137
659	kb8_rep_c664	kb8_s54121	kb8_s62604
660	kb8_rep_c665	kb8_rep_c29328
661	kb8_rep_c666	kb8_s60259	kb8_s63036
663	kb8_rep_c668	kb8_s57948
664	kb8_rep_c669	kb8_s54426
665	kb8_rep_c670	kb8_rep_c16321
667	kb8_rep_c672	kb8_s56004	kb8_s64930
668	kb8_rep_c673	kb8_rep_c47354	kb8_s64937
669	kb8_rep_c674	kb8_rep_c5126	kb8_s52304	kb8_rep_c52622	kb8_rep_c53995
670	kb8_rep_c675	kb8_s59020
671	kb8_rep_c676	kb8_c50397	kb8_s70693
672	kb8_rep_c677	kb8_rep_c4229
674	kb8_rep_c679	kb8_rep_c2550	kb8_rep_c38828	kb8_rep_c52004	kb8_s57309	kb8_s58827	kb8_s59389
675	kb8_rep_c680	kb8_rep_c1819	kb8_rep_c16159	kb8_rep_c24040	kb8_rep_c51710	kb8_rep_c52005	kb8_rep_c52117	kb8_s58390	kb8_s58391	kb8_s58534	kb8_s63044	kb8_s69336
676	kb8_rep_c681	kb8_s66274
677	kb8_rep_c682	kb8_s53416
679	kb8_rep_c684	kb8_s69948
680	kb8_rep_c685	kb8_s58062
683	kb8_rep_c688	kb8_s59804	kb8_s61151
684	kb8_rep_c689	kb8_s62770
685	kb8_rep_c690	kb8_s62217	kb8_s64159
686	kb8_rep_c691	kb8_rep_c45689
687	kb8_rep_c692	kb8_s53337
688	kb8_rep_c693	kb8_s64973
689	kb8_rep_c694	kb8_rep_c62487
692	kb8_rep_c697	kb8_s64581
693	kb8_rep_c698	kb8_rep_c39893
694	kb8_rep_c699	kb8_rep_c24824	kb8_s58226	kb8_s65475
695	kb8_rep_c700	kb8_s70725
696	kb8_rep_c701	kb8_s71787
698	kb8_rep_c703	kb8_s52369	kb8_s53135	kb8_s60247
699	kb8_rep_c704	kb8_s60310
700	kb8_rep_c705	kb8_s70783
701	kb8_rep_c706	kb8_s52690	kb8_s55551	kb8_s59638
704	kb8_rep_c709	kb8_s63595
706	kb8_rep_c711	kb8_s55282
707	kb8_rep_c712	kb8_s69818
708	kb8_rep_c713	kb8_s60871	kb8_s71215
709	kb8_rep_c714	kb8_s65514
711	kb8_rep_c716	kb8_rep_c45647	kb8_rep_c48479
712	kb8_rep_c717	kb8_rep_c10269
713	kb8_rep_c718	kb8_s58639
717	kb8_rep_c722	kb8_s70935
718	kb8_rep_c723	kb8_s52180
719	kb8_rep_c724	kb8_c7441	kb8_s58998	kb8_s63481
720	kb8_rep_c725	kb8_rep_c2882
721	kb8_rep_c726	kb8_s66618
722	kb8_rep_c727	kb8_rep_c32324	kb8_rep_c41711
723	kb8_rep_c728	kb8_s51723
724	kb8_rep_c729	kb8_s58771	kb8_s66615
725	kb8_rep_c730	kb8_c47295	kb8_s55154
727	kb8_rep_c732	kb8_s53398	kb8_s54462
729	kb8_rep_c734	kb8_rep_c25217
730	kb8_rep_c735	kb8_rep_c25516	kb8_s59654	kb8_s60301	kb8_rep_c62572
731	kb8_rep_c736	kb8_rep_c50234	kb8_s61194
734	kb8_rep_c739	kb8_s61937	kb8_s70616
738	kb8_rep_c743	kb8_s64483
742	kb8_rep_c747	kb8_s70117
743	kb8_rep_c748	kb8_rep_c17559	kb8_rep_c46564
745	kb8_rep_c750	kb8_rep_c22569
746	kb8_rep_c751	kb8_s58402	kb8_s61250
747	kb8_rep_c752	kb8_s54088	kb8_s56310	kb8_s63275
748	kb8_rep_c753	kb8_s64465
749	kb8_rep_c754	kb8_rep_c51051
750	kb8_rep_c755	kb8_rep_c36596	kb8_s49371
751	kb8_rep_c756	kb8_rep_c52049	kb8_s66213	kb8_s66721
753	kb8_rep_c758	kb8_s54354
755	kb8_rep_c760	kb8_s56937
756	kb8_rep_c761	kb8_s62842	kb8_s64893	kb8_s70553
758	kb8_rep_c763	kb8_s57366
759	kb8_rep_c764	kb8_s64647
760	kb8_rep_c765	kb8_s69083
762	kb8_rep_c767	kb8_rep_c47900
763	kb8_rep_c768	kb8_rep_c2399	kb8_rep_c13059	kb8_rep_c26646	kb8_rep_c52978	kb8_s57825	kb8_s63903
764	kb8_rep_c769	kb8_rep_c20587
765	kb8_rep_c770	kb8_rep_c32306	kb8_rep_c44432
766	kb8_rep_c771	kb8_s55858	kb8_s66545	kb8_s67838
767	kb8_rep_c772	kb8_s66946
770	kb8_rep_c775	kb8_s55424	kb8_s57098
771	kb8_rep_c776	kb8_s68654
773	kb8_rep_c778	kb8_rep_c8720
774	kb8_rep_c779	kb8_s54378
776	kb8_rep_c781	kb8_s55816
777	kb8_rep_c782	kb8_s65615
778	kb8_rep_c783	kb8_rep_c51167	kb8_s70802
779	kb8_rep_c784	kb8_s55033	kb8_s63911	kb8_s66288
780	kb8_rep_c785	kb8_rep_c50505
781	kb8_rep_c786	kb8_rep_c2826	kb8_rep_c52111	kb8_rep_c52884	kb8_rep_c53658	kb8_rep_c54516	kb8_rep_c54674	kb8_rep_c55011	kb8_rep_c55221	kb8_s56090	kb8_s58915	kb8_s63046	kb8_s63825	kb8_s68705	kb8_s70807
782	kb8_rep_c787	kb8_rep_c24753
783	kb8_rep_c788	kb8_rep_c57839
785	kb8_rep_c790	kb8_rep_c40617	kb8_rep_c48165
787	kb8_rep_c792	kb8_s62318
788	kb8_rep_c793	kb8_s66552
789	kb8_rep_c794	kb8_s54991	kb8_s57531
790	kb8_rep_c795	kb8_rep_c16448	kb8_s66083
792	kb8_rep_c797	kb8_s62488	kb8_s64260
793	kb8_rep_c798	kb8_s66135	kb8_s68889
795	kb8_rep_c800	kb8_s53022	kb8_s56112
796	kb8_rep_c801	kb8_s56440
798	kb8_rep_c803	kb8_rep_c36868
799	kb8_rep_c804	kb8_s61324
800	kb8_rep_c805	kb8_s55279	kb8_s69562
801	kb8_rep_c806	kb8_s59338
803	kb8_rep_c808	kb8_s66530
804	kb8_rep_c809	kb8_s56109	kb8_s70996
805	kb8_rep_c810	kb8_s56696
807	kb8_rep_c812	kb8_s62750
808	kb8_rep_c813	kb8_s61660	kb8_s65168
812	kb8_rep_c817	kb8_rep_c28744	kb8_rep_c39276	kb8_s68541
813	kb8_rep_c818	kb8_s57000	kb8_s60680
815	kb8_rep_c820	kb8_rep_c18927	kb8_rep_c40177
816	kb8_rep_c821	kb8_s54287
818	kb8_rep_c823	kb8_s60166
819	kb8_rep_c824	kb8_s59305	kb8_s60529
820	kb8_rep_c825	kb8_s71179
821	kb8_rep_c826	kb8_s60261
822	kb8_rep_c827	kb8_s56980
827	kb8_rep_c832	kb8_rep_c48769	kb8_rep_c50300	kb8_s54554	kb8_s65249
829	kb8_rep_c834	kb8_s69295	kb8_s71739
830	kb8_rep_c835	kb8_s67468
832	kb8_rep_c837	kb8_s54120
835	kb8_rep_c840	kb8_rep_c50988	kb8_s65521
836	kb8_rep_c841	kb8_rep_c45519
839	kb8_rep_c844	kb8_rep_c15684	kb8_c17630	kb8_rep_c26936	kb8_rep_c35278
842	kb8_rep_c847	kb8_s60351
843	kb8_rep_c848	kb8_s60803
844	kb8_rep_c849	kb8_s68323
846	kb8_rep_c851	kb8_rep_c21276	kb8_s60013	kb8_s71165
847	kb8_rep_c852	kb8_s62003	kb8_s65447	kb8_s66535
848	kb8_rep_c853	kb8_s70194
849	kb8_rep_c854	kb8_rep_c48990
850	kb8_rep_c855	kb8_rep_c3131	kb8_rep_c14509	kb8_rep_c22525	kb8_rep_c28194	kb8_s54651	kb8_s63041	kb8_s68156
854	kb8_rep_c859	kb8_rep_c48351
855	kb8_rep_c860	kb8_s62387
856	kb8_rep_c861	kb8_s63014
857	kb8_rep_c862	kb8_s65326
861	kb8_rep_c866	kb8_s71194
862	kb8_rep_c867	kb8_s66133
863	kb8_rep_c868	kb8_rep_c57048	kb8_s58296
865	kb8_rep_c870	kb8_s61591	kb8_s62973	kb8_s63563
866	kb8_rep_c871	kb8_s57455	kb8_s62184
867	kb8_rep_c872	kb8_rep_c5580	kb8_rep_c31609	kb8_rep_c51057	kb8_s51887	kb8_s54357	kb8_s65518	kb8_s70502
871	kb8_rep_c876	kb8_s66582
873	kb8_rep_c878	kb8_s59844	kb8_s71497
874	kb8_rep_c879	kb8_s62876
875	kb8_rep_c880	kb8_s62098
876	kb8_rep_c881	kb8_s54656	kb8_s58106
877	kb8_rep_c882	kb8_s56566	kb8_s59945
881	kb8_rep_c887	kb8_rep_c43107	kb8_s69718
882	kb8_rep_c888	kb8_rep_c10897	kb8_s69316
884	kb8_rep_c890	kb8_rep_c11136	kb8_rep_c13123	kb8_rep_c23366	kb8_rep_c51465	kb8_s52099	kb8_s53003	kb8_rep_c53948	kb8_rep_c57537	kb8_s61239	kb8_s63516	kb8_s64176	kb8_s64952	kb8_s65145	kb8_s66395	kb8_s68953	kb8_s70881
885	kb8_rep_c891	kb8_rep_c21069	kb8_rep_c48255
886	kb8_rep_c892	kb8_s64798
887	kb8_rep_c893	kb8_s61863
888	kb8_rep_c894	kb8_s52405
889	kb8_rep_c895	kb8_s55496
890	kb8_rep_c896	kb8_s53782	kb8_s57193
891	kb8_rep_c897	kb8_s72017
893	kb8_rep_c899	kb8_rep_c12442	kb8_rep_c51371	kb8_rep_c52775	kb8_s60619	kb8_s67063	kb8_s67840
894	kb8_rep_c900	kb8_rep_c41915
896	kb8_rep_c902	kb8_rep_c4381	kb8_s51514
897	kb8_rep_c903	kb8_s53506	kb8_s68238
899	kb8_rep_c905	kb8_s52893	kb8_s60019
900	kb8_rep_c906	kb8_s68748
901	kb8_rep_c907	kb8_rep_c37364	kb8_rep_c49306	kb8_s58964	kb8_s65754	kb8_s69133
902	kb8_rep_c908	kb8_rep_c62031	kb8_s64433	kb8_s66444	kb8_s66845
903	kb8_rep_c909	kb8_s63091	kb8_s63255
906	kb8_rep_c912	kb8_s67653
907	kb8_rep_c913	kb8_s55048
910	kb8_rep_c916	kb8_s61772
912	kb8_rep_c918	kb8_rep_c23905	kb8_s52831	kb8_s55503
913	kb8_rep_c919	kb8_s56778
916	kb8_rep_c922	kb8_s68433
917	kb8_rep_c923	kb8_s51448
918	kb8_rep_c924	kb8_s51969	kb8_s69039
919	kb8_rep_c925	kb8_rep_c35406
920	kb8_rep_c926	kb8_s56060
921	kb8_rep_c927	kb8_s66330
922	kb8_rep_c928	kb8_rep_c39129	kb8_s66943
923	kb8_rep_c929	kb8_s51965
925	kb8_rep_c931	kb8_s52745	kb8_s62804
926	kb8_rep_c932	kb8_rep_c54110
929	kb8_rep_c935	kb8_rep_c50443
930	kb8_rep_c936	kb8_s63590
931	kb8_rep_c937	kb8_s67865
932	kb8_rep_c938	kb8_s64098	kb8_s70706
933	kb8_rep_c939	kb8_rep_c35747	kb8_s68480
935	kb8_rep_c941	kb8_s69999
936	kb8_rep_c942	kb8_rep_c40865
939	kb8_rep_c945	kb8_s63558
941	kb8_rep_c947	kb8_rep_c50155	kb8_s70750
942	kb8_rep_c948	kb8_rep_c31460	kb8_rep_c49530
943	kb8_rep_c949	kb8_s57028	kb8_s65121
944	kb8_rep_c950	kb8_rep_c44157
945	kb8_rep_c951	kb8_rep_c44777	kb8_s56747
948	kb8_rep_c954	kb8_s53642
952	kb8_rep_c958	kb8_rep_c45777	kb8_s53981	kb8_s65751
954	kb8_rep_c960	kb8_rep_c54105	kb8_rep_c54374	kb8_s56350	kb8_s68407
955	kb8_rep_c961	kb8_rep_c47898	kb8_s54937
957	kb8_rep_c963	kb8_rep_c48109	kb8_s58968	kb8_s59098	kb8_s64470
958	kb8_rep_c964	kb8_s70095
959	kb8_rep_c965	kb8_s71525
960	kb8_rep_c966	kb8_rep_c4040	kb8_rep_c25451	kb8_s65297
962	kb8_rep_c968	kb8_s59208	kb8_s59650	kb8_s60891
963	kb8_rep_c969	kb8_rep_c39407
965	kb8_rep_c971	kb8_s61457
967	kb8_rep_c973	kb8_rep_c40681	kb8_rep_c49667	kb8_s62305
971	kb8_rep_c977	kb8_s56018	kb8_s66803
972	kb8_rep_c978	kb8_s56313
975	kb8_rep_c981	kb8_s52225
979	kb8_rep_c985	kb8_rep_c38396
980	kb8_rep_c986	kb8_rep_c53014	kb8_s58288	kb8_s64556	kb8_s71395
981	kb8_rep_c987	kb8_s51396	kb8_rep_c60507	kb8_s65957
982	kb8_rep_c988	kb8_s57542	kb8_s68311
983	kb8_rep_c989	kb8_rep_c45182
984	kb8_rep_c990	kb8_rep_c2547	kb8_s51798
991	kb8_rep_c997	kb8_s59563
992	kb8_rep_c998	kb8_rep_c45340
993	kb8_rep_c999	kb8_rep_c11526	kb8_rep_c32799	kb8_s65224
994	kb8_rep_c1000	kb8_rep_c22319	kb8_rep_c38493
995	kb8_rep_c1001	kb8_s53297	kb8_s56243
997	kb8_rep_c1003	kb8_c27121
998	kb8_rep_c1004	kb8_rep_c31070
1001	kb8_rep_c1007	kb8_s65408	kb8_s65899
1002	kb8_rep_c1008	kb8_s53828	kb8_s65988
1003	kb8_rep_c1009	kb8_s58779	kb8_s59197
1004	kb8_rep_c1010	kb8_s55379	kb8_s67127
1005	kb8_rep_c1011	kb8_s62638
1007	kb8_rep_c1013	kb8_s69319
1008	kb8_rep_c1014	kb8_s69994
1009	kb8_rep_c1015	kb8_s61959
1010	kb8_rep_c1016	kb8_s71285
1011	kb8_rep_c1017	kb8_rep_c35216
1012	kb8_rep_c1018	kb8_s55693	kb8_s61908
1014	kb8_rep_c1020	kb8_rep_c48250	kb8_s62959
1015	kb8_rep_c1021	kb8_rep_c27419
1016	kb8_rep_c1022	kb8_s62934	kb8_s64090
1017	kb8_rep_c1023	kb8_s57119
1018	kb8_rep_c1024	kb8_rep_c3907	kb8_rep_c51910	kb8_rep_c53507	kb8_s59037	kb8_s65729
1019	kb8_rep_c1025	kb8_s56395	kb8_s69226
1020	kb8_rep_c1026	kb8_rep_c13949	kb8_rep_c19775	kb8_rep_c40668	kb8_c49731	kb8_rep_c52784	kb8_rep_c52895	kb8_rep_c55833	kb8_s56630	kb8_rep_c57462	kb8_s57861	kb8_s60732
1021	kb8_rep_c1027	kb8_rep_c45968
1024	kb8_rep_c1030	kb8_rep_c49817	kb8_s58924
1025	kb8_rep_c1031	kb8_s68071
1028	kb8_rep_c1034	kb8_s53226
1031	kb8_rep_c1037	kb8_rep_c47580	kb8_s70253
1033	kb8_rep_c1039	kb8_rep_c20883
1035	kb8_rep_c1041	kb8_s56735
1036	kb8_rep_c1042	kb8_rep_c26986	kb8_s56298
1037	kb8_rep_c1043	kb8_rep_c43479	kb8_s64618	kb8_s67189
1038	kb8_rep_c1044	kb8_s63610
1039	kb8_rep_c1045	kb8_s51705
1040	kb8_rep_c1046	kb8_s59001	kb8_s65780
1042	kb8_rep_c1048	kb8_rep_c30899	kb8_rep_c36046
1045	kb8_rep_c1051	kb8_c19706
1046	kb8_rep_c1052	kb8_s57999
1047	kb8_rep_c1053	kb8_s56289	kb8_s68980
1048	kb8_rep_c1054	kb8_s59043
1049	kb8_rep_c1055	kb8_rep_c14787	kb8_s55178	kb8_rep_c59487	kb8_s62412	kb8_rep_c65134
1050	kb8_rep_c1056	kb8_s67227
1051	kb8_rep_c1057	kb8_s62823
1052	kb8_rep_c1058	kb8_s65423	kb8_s71164
1055	kb8_rep_c1061	kb8_rep_c40085	kb8_s58073
1057	kb8_rep_c1063	kb8_rep_c35247
1059	kb8_rep_c1065	kb8_rep_c42221
1060	kb8_rep_c1066	kb8_s54812	kb8_s65293
1061	kb8_rep_c1067	kb8_s70700
1062	kb8_rep_c1068	kb8_s70254
1063	kb8_rep_c1069	kb8_rep_c46431	kb8_s68865
1064	kb8_rep_c1070	kb8_s52717	kb8_s63940
1065	kb8_rep_c1071	kb8_rep_c21070
1066	kb8_rep_c1072	kb8_rep_c4265	kb8_rep_c33483	kb8_c42581	kb8_rep_c47083	kb8_s52143	kb8_s68414
1070	kb8_rep_c1076	kb8_rep_c19436	kb8_s59780
1073	kb8_rep_c1079	kb8_s69180	kb8_s70043
1074	kb8_rep_c1080	kb8_s59763	kb8_s65035
1077	kb8_rep_c1083	kb8_rep_c6229	kb8_rep_c21169	kb8_rep_c30723	kb8_rep_c53078	kb8_s58802	kb8_s59445	kb8_s63994	kb8_s66169
1078	kb8_rep_c1084	kb8_rep_c14224	kb8_rep_c27692	kb8_rep_c37081	kb8_rep_c47921	kb8_rep_c48213	kb8_rep_c55795	kb8_rep_c56865	kb8_s60435	kb8_s64969
1079	kb8_rep_c1085	kb8_c50824	kb8_s52626	kb8_rep_c60892	kb8_s65619
1080	kb8_rep_c1086	kb8_rep_c46090
1081	kb8_rep_c1087	kb8_s63198
1082	kb8_rep_c1088	kb8_rep_c33463	kb8_s62670	kb8_s71666
1084	kb8_rep_c1090	kb8_s66010
1085	kb8_rep_c1091	kb8_s52952
1086	kb8_rep_c1092	kb8_s55838	kb8_s62149	kb8_s64493
1088	kb8_rep_c1094	kb8_s54986
1089	kb8_rep_c1095	kb8_s60492	kb8_s64399
1094	kb8_rep_c1100	kb8_s68058
1097	kb8_rep_c1103	kb8_s62637
1103	kb8_rep_c1109	kb8_s68730
1105	kb8_rep_c1111	kb8_rep_c24566	kb8_rep_c67490
1107	kb8_rep_c1113	kb8_s68428
1109	kb8_rep_c1116	kb8_rep_c46956
1110	kb8_rep_c1117	kb8_rep_c42410	kb8_rep_c45743	kb8_s58027
1112	kb8_rep_c1119	kb8_s59079
1116	kb8_rep_c1123	kb8_rep_c29949	kb8_s62130
1117	kb8_rep_c1124	kb8_s41766	kb8_s63164
1119	kb8_rep_c1126	kb8_s61433	kb8_s61655
1120	kb8_rep_c1127	kb8_s57290
1121	kb8_rep_c1128	kb8_s56870	kb8_s57240
1122	kb8_rep_c1129	kb8_rep_c16004
1124	kb8_rep_c1131	kb8_s51211	kb8_s64479	kb8_s68206
1127	kb8_rep_c1134	kb8_rep_c39929	kb8_s60622	kb8_s64747	kb8_s69182
1128	kb8_rep_c1135	kb8_s51393
1129	kb8_rep_c1136	kb8_s51975
1134	kb8_rep_c1141	kb8_s65149
1135	kb8_rep_c1142	kb8_s68562
1137	kb8_rep_c1144	kb8_s52112
1138	kb8_rep_c1145	kb8_rep_c35828	kb8_rep_c36333	kb8_s52021
1139	kb8_rep_c1146	kb8_rep_c59868	kb8_s66336
1140	kb8_rep_c1147	kb8_rep_c52317	kb8_s54847	kb8_s67418
1142	kb8_rep_c1149	kb8_rep_c38970	kb8_s58322	kb8_s66167	kb8_s67090
1143	kb8_rep_c1150	kb8_s63960
1146	kb8_rep_c1153	kb8_s65210
1149	kb8_rep_c1156	kb8_s53206
1150	kb8_rep_c1157	kb8_s71155
1151	kb8_rep_c1159	kb8_s63896	kb8_s68005
1152	kb8_rep_c1160	kb8_s55401
1153	kb8_rep_c1161	kb8_s63177
1157	kb8_rep_c1165	kb8_s65107	kb8_s65196
1158	kb8_rep_c1166	kb8_s59454
1159	kb8_rep_c1167	kb8_rep_c48450
1161	kb8_rep_c1169	kb8_s58584
1165	kb8_rep_c1173	kb8_rep_c16975	kb8_s70071
1166	kb8_rep_c1174	kb8_rep_c48170	kb8_s54736	kb8_s67631
1167	kb8_rep_c1175	kb8_s66654
1168	kb8_rep_c1176	kb8_s52920
1169	kb8_rep_c1177	kb8_s55284	kb8_s61228	kb8_s64010
1171	kb8_rep_c1179	kb8_s59068
1172	kb8_rep_c1180	kb8_rep_c50433
1174	kb8_rep_c1182	kb8_s55325	kb8_s60427
1175	kb8_rep_c1183	kb8_s57488
1176	kb8_rep_c1184	kb8_rep_c4364	kb8_rep_c13348	kb8_rep_c20167	kb8_rep_c42864	kb8_s52371	kb8_rep_c52767	kb8_s61802
1177	kb8_rep_c1185	kb8_s55805	kb8_s56178
1178	kb8_rep_c1186	kb8_rep_c58128	kb8_s60570	kb8_s60615	kb8_s69449
1180	kb8_rep_c1188	kb8_s71167
1182	kb8_rep_c1190	kb8_s58302	kb8_s69153
1189	kb8_rep_c1197	kb8_s57894
1190	kb8_rep_c1198	kb8_rep_c15011	kb8_rep_c18643	kb8_s52430	kb8_s54294	kb8_s61439	kb8_rep_c63140
1193	kb8_rep_c1201	kb8_s52721
1194	kb8_rep_c1202	kb8_rep_c17869	kb8_rep_c34528
1195	kb8_rep_c1203	kb8_c21545
1196	kb8_rep_c1204	kb8_s63741
1198	kb8_rep_c1206	kb8_s58976
1199	kb8_rep_c1207	kb8_rep_c19155
1200	kb8_rep_c1208	kb8_s62167
1204	kb8_rep_c1212	kb8_rep_c39945	kb8_s55664	kb8_s60776	kb8_s69321
1205	kb8_rep_c1213	kb8_s51817
1211	kb8_rep_c1220	kb8_s54819
1215	kb8_rep_c1224	kb8_s59829	kb8_s62473
1216	kb8_rep_c1225	kb8_s53764
1217	kb8_rep_c1226	kb8_rep_c46150
1218	kb8_rep_c1227	kb8_s59014
1221	kb8_rep_c1230	kb8_s63264
1222	kb8_rep_c1231	kb8_s55570
1224	kb8_rep_c1233	kb8_s61545	kb8_s69892
1225	kb8_rep_c1234	kb8_rep_c11437	kb8_rep_c24251	kb8_rep_c35602	kb8_rep_c54175	kb8_s63557	kb8_s64489
1226	kb8_rep_c1235	kb8_s63797	kb8_s69055
1227	kb8_rep_c1236	kb8_s70867
1229	kb8_rep_c1238	kb8_s59022
1232	kb8_rep_c1241	kb8_s53992	kb8_s58183
1233	kb8_rep_c1242	kb8_rep_c45784
1235	kb8_rep_c1244	kb8_rep_c7075	kb8_rep_c14266	kb8_rep_c53700	kb8_rep_c54435	kb8_rep_c57623	kb8_s59939
1236	kb8_rep_c1245	kb8_s67096
1242	kb8_rep_c1251	kb8_s62392
1243	kb8_rep_c1252	kb8_rep_c2947
1244	kb8_rep_c1253	kb8_s58977
1246	kb8_rep_c1255	kb8_s59817	kb8_s66757
1249	kb8_rep_c1258	kb8_s45169	kb8_s63541
1252	kb8_rep_c1261	kb8_s70603
1253	kb8_rep_c1262	kb8_rep_c19679	kb8_s56031	kb8_s57660	kb8_s68140
1255	kb8_rep_c1264	kb8_s69413
1256	kb8_rep_c1265	kb8_rep_c26339	kb8_rep_c49045
1257	kb8_rep_c1266	kb8_rep_c47031	kb8_s61622	kb8_s63791	kb8_s64018	kb8_s65058	kb8_s71733
1260	kb8_rep_c1269	kb8_s56341	kb8_s69976
1261	kb8_rep_c1270	kb8_s65639	kb8_s70772
1262	kb8_rep_c1271	kb8_s67175
1264	kb8_rep_c1273	kb8_s57356
1265	kb8_rep_c1274	kb8_s56497	kb8_s68724	kb8_s69349
1266	kb8_rep_c1275	kb8_s62761
1267	kb8_rep_c1276	kb8_rep_c29505	kb8_rep_c51481	kb8_rep_c52487	kb8_s55292
1268	kb8_rep_c1277	kb8_s64592
1269	kb8_rep_c1278	kb8_s56382	kb8_s60770	kb8_s61262
1271	kb8_rep_c1280	kb8_rep_c38452	kb8_s52563
1274	kb8_rep_c1283	kb8_rep_c20530
1275	kb8_rep_c1284	kb8_s66609
1276	kb8_rep_c1285	kb8_rep_c31897	kb8_s67926
1277	kb8_rep_c1287	kb8_s70275
1280	kb8_rep_c1290	kb8_s53331	kb8_s61600
1281	kb8_rep_c1291	kb8_rep_c48647	kb8_s58619
1282	kb8_rep_c1292	kb8_rep_c47671	kb8_s58053	kb8_s61224
1283	kb8_rep_c1293	kb8_rep_c44645	kb8_s63502
1284	kb8_rep_c1294	kb8_s61116	kb8_s68576
1286	kb8_rep_c1296	kb8_s63067
1287	kb8_rep_c1297	kb8_s68127
1288	kb8_rep_c1298	kb8_s52418
1291	kb8_rep_c1301	kb8_s51228
1294	kb8_rep_c1304	kb8_s59702	kb8_s66487
1296	kb8_rep_c1306	kb8_s64756
1298	kb8_rep_c1308	kb8_rep_c42181	kb8_rep_c55076	kb8_s55772	kb8_s58999
1299	kb8_rep_c1309	kb8_s56057
1300	kb8_rep_c1310	kb8_rep_c29842
1301	kb8_rep_c1311	kb8_s55668	kb8_s60531
1302	kb8_rep_c1312	kb8_s56253	kb8_s57921	kb8_s60360	kb8_s71499
1305	kb8_rep_c1315	kb8_s55211	kb8_s60329	kb8_s66973
1306	kb8_rep_c1316	kb8_s70489
1308	kb8_rep_c1319	kb8_rep_c43950	kb8_s55715	kb8_s71469
1309	kb8_rep_c1320	kb8_rep_c39934
1311	kb8_rep_c1322	kb8_s53673
1312	kb8_rep_c1323	kb8_s59828	kb8_s67086
1313	kb8_rep_c1324	kb8_s66342
1316	kb8_rep_c1327	kb8_s52397	kb8_s67497	kb8_s68296
1317	kb8_rep_c1328	kb8_rep_c14258	kb8_rep_c24058	kb8_s61128
1318	kb8_rep_c1329	kb8_s52705
1323	kb8_rep_c1334	kb8_s52114
1325	kb8_rep_c1336	kb8_s68316
1326	kb8_rep_c1337	kb8_s61214
1328	kb8_rep_c1339	kb8_s66711
1331	kb8_rep_c1342	kb8_s70730
1339	kb8_rep_c1350	kb8_rep_c52972	kb8_s63961
1340	kb8_rep_c1351	kb8_s61296
1341	kb8_rep_c1352	kb8_rep_c34417	kb8_s56185	kb8_s71949	kb8_s72075
1342	kb8_rep_c1353	kb8_s58368
1343	kb8_rep_c1354	kb8_rep_c31672	kb8_s56306	kb8_s57779	kb8_s58581	kb8_s62925
1345	kb8_rep_c1357	kb8_c48509	kb8_rep_c51372	kb8_rep_c51472	kb8_rep_c52600	kb8_s54015	kb8_s63807
1352	kb8_rep_c1364	kb8_s59719	kb8_s61620
1356	kb8_rep_c1368	kb8_s57938	kb8_s61844
1357	kb8_rep_c1369	kb8_s56789
1360	kb8_rep_c1372	kb8_s68416
1363	kb8_rep_c1376	kb8_s64865
1365	kb8_rep_c1378	kb8_s66957
1366	kb8_rep_c1379	kb8_s64497
1367	kb8_rep_c1380	kb8_s62320	kb8_s67058
1368	kb8_rep_c1381	kb8_s54345	kb8_s67908
1369	kb8_rep_c1382	kb8_s56249	kb8_s71309
1370	kb8_rep_c1383	kb8_s57204
1372	kb8_rep_c1385	kb8_rep_c16379
1374	kb8_rep_c1387	kb8_s52735
1376	kb8_rep_c1389	kb8_s51362	kb8_s63796
1379	kb8_rep_c1392	kb8_s65026
1380	kb8_rep_c1393	kb8_s68764
1382	kb8_rep_c1395	kb8_s64336
1384	kb8_rep_c1397	kb8_s54650
1387	kb8_rep_c1400	kb8_s55811	kb8_s60059
1388	kb8_rep_c1401	kb8_s65288
1389	kb8_rep_c1402	kb8_rep_c51605	kb8_s51645	kb8_s61761
1390	kb8_rep_c1403	kb8_s64229
1391	kb8_rep_c1404	kb8_rep_c10899	kb8_rep_c53916	kb8_s58960	kb8_s64046	kb8_rep_c65463
1392	kb8_rep_c1405	kb8_rep_c52929
1394	kb8_rep_c1407	kb8_rep_c45714	kb8_s60608
1395	kb8_rep_c1408	kb8_rep_c50036
1400	kb8_rep_c1413	kb8_s52155	kb8_s53132	kb8_s68820
1402	kb8_rep_c1415	kb8_s52313	kb8_s53809	kb8_s55295	kb8_s62886	kb8_s68439	kb8_s71582
1403	kb8_rep_c1416	kb8_s63985	kb8_s71141
1409	kb8_rep_c1422	kb8_s69595
1411	kb8_rep_c1424	kb8_s67668
1412	kb8_rep_c1425	kb8_s64939
1413	kb8_rep_c1426	kb8_s66975
1414	kb8_rep_c1427	kb8_rep_c34609	kb8_s66374
1415	kb8_rep_c1428	kb8_rep_c28112	kb8_s53436	kb8_s55392
1416	kb8_rep_c1429	kb8_rep_c55296
1417	kb8_rep_c1430	kb8_rep_c48099	kb8_s51679	kb8_s62041
1418	kb8_rep_c1431	kb8_s54401	kb8_s63332
1419	kb8_rep_c1432	kb8_s57373
1421	kb8_rep_c1434	kb8_rep_c50282
1423	kb8_rep_c1436	kb8_s56964	kb8_s58090	kb8_s62582
1427	kb8_rep_c1440	kb8_s56247	kb8_s67613
1429	kb8_rep_c1442	kb8_s65620
1430	kb8_rep_c1443	kb8_s65726
1433	kb8_rep_c1446	kb8_s63779	kb8_s69029
1438	kb8_rep_c1451	kb8_s64438
1441	kb8_rep_c1454	kb8_rep_c12939	kb8_rep_c29730	kb8_s53449	kb8_rep_c55216	kb8_s60029	kb8_s62077	kb8_s62674	kb8_s63133	kb8_s63457	kb8_s72006
1442	kb8_rep_c1455	kb8_s54543
1443	kb8_rep_c1456	kb8_s70452
1444	kb8_rep_c1457	kb8_s63705
1446	kb8_rep_c1459	kb8_rep_c13282
1448	kb8_rep_c1461	kb8_rep_c42492	kb8_s67493	kb8_s71990
1449	kb8_rep_c1462	kb8_s60624	kb8_s69914
1450	kb8_rep_c1463	kb8_s67273
1451	kb8_rep_c1464	kb8_s57536
1453	kb8_rep_c1466	kb8_rep_c56849
1454	kb8_rep_c1467	kb8_s55443
1456	kb8_rep_c1469	kb8_s58917	kb8_s62048
1457	kb8_rep_c1470	kb8_rep_c56861	kb8_s64948
1458	kb8_rep_c1471	kb8_s63207
1459	kb8_rep_c1472	kb8_c50507	kb8_s69936
1460	kb8_rep_c1473	kb8_rep_c18869	kb8_rep_c34948	kb8_rep_c39260	kb8_s70830
1463	kb8_rep_c1476	kb8_rep_c47588	kb8_rep_c62044
1464	kb8_rep_c1477	kb8_s51871	kb8_s57878	kb8_s59345	kb8_s61211
1466	kb8_rep_c1479	kb8_rep_c48476
1468	kb8_rep_c1481	kb8_s60330
1469	kb8_rep_c1482	kb8_s58275
1471	kb8_rep_c1484	kb8_s55381
1473	kb8_rep_c1486	kb8_s57653
1474	kb8_rep_c1487	kb8_s64455
1476	kb8_rep_c1489	kb8_s61686
1477	kb8_rep_c1490	kb8_s70622
1478	kb8_rep_c1491	kb8_s60096	kb8_s62037
1480	kb8_rep_c1493	kb8_s54494
1481	kb8_rep_c1494	kb8_s56251	kb8_s61421
1484	kb8_rep_c1497	kb8_s65632	kb8_s68177
1486	kb8_rep_c1499	kb8_s66074
1487	kb8_rep_c1500	kb8_s63544
1488	kb8_rep_c1501	kb8_rep_c19130	kb8_rep_c62068	kb8_s67640
1490	kb8_rep_c1503	kb8_s56689	kb8_s57882
1493	kb8_rep_c1506	kb8_rep_c44504	kb8_rep_c46816	kb8_s62308
1495	kb8_rep_c1508	kb8_s57995
1497	kb8_rep_c1510	kb8_s62461
1498	kb8_rep_c1511	kb8_rep_c36665	kb8_c46638	kb8_s55793	kb8_s59877	kb8_s69211
1499	kb8_rep_c1512	kb8_rep_c31464	kb8_rep_c40719	kb8_s57668	kb8_s65705
1500	kb8_rep_c1513	kb8_s55878	kb8_s63492	kb8_s69329
1501	kb8_rep_c1514	kb8_s64553
1504	kb8_rep_c1517	kb8_rep_c35355
1505	kb8_rep_c1518	kb8_rep_c42910
1506	kb8_rep_c1519	kb8_s69867
1508	kb8_rep_c1521	kb8_rep_c40557	kb8_s64059	kb8_s66079	kb8_s68357	kb8_s70576
1509	kb8_rep_c1522	kb8_s70296
1512	kb8_rep_c1525	kb8_rep_c57491
1513	kb8_rep_c1526	kb8_rep_c25818	kb8_s54272	kb8_rep_c58049	kb8_rep_c58954	kb8_s61671	kb8_s63669
1515	kb8_rep_c1528	kb8_rep_c60836
1517	kb8_rep_c1530	kb8_s68591
1518	kb8_rep_c1531	kb8_s71373
1519	kb8_rep_c1532	kb8_s53997
1520	kb8_rep_c1533	kb8_s54560
1522	kb8_rep_c1535	kb8_c56536	kb8_s65837
1524	kb8_rep_c1537	kb8_rep_c53210	kb8_s63873
1527	kb8_rep_c1540	kb8_s65973
1528	kb8_rep_c1541	kb8_s71388
1532	kb8_rep_c1545	kb8_rep_c17222	kb8_rep_c49674	kb8_s51402	kb8_s69622
1534	kb8_rep_c1547	kb8_s62628	kb8_s71472
1536	kb8_rep_c1549	kb8_s69789
1538	kb8_rep_c1551	kb8_rep_c36179	kb8_s64264
1539	kb8_rep_c1552	kb8_s58046
1543	kb8_rep_c1556	kb8_rep_c5447	kb8_s51905	kb8_s54753	kb8_s56197	kb8_s63183	kb8_s66691	kb8_s68055	kb8_s68343	kb8_s69917
1553	kb8_rep_c1566	kb8_s63814
1554	kb8_rep_c1567	kb8_s59647
1555	kb8_rep_c1568	kb8_rep_c38175
1556	kb8_rep_c1569	kb8_s58695	kb8_s59093
1561	kb8_rep_c1574	kb8_rep_c24052	kb8_rep_c34888	kb8_c51755	kb8_c53954	kb8_s58173	kb8_s66926
1563	kb8_rep_c1576	kb8_rep_c58373
1564	kb8_rep_c1577	kb8_rep_c41658	kb8_s69765
1565	kb8_rep_c1578	kb8_s63377
1566	kb8_rep_c1579	kb8_rep_c46095
1568	kb8_rep_c1581	kb8_s62821
1569	kb8_rep_c1582	kb8_rep_c35608	kb8_s59812	kb8_s63285	kb8_s69027	kb8_s69577
1570	kb8_rep_c1583	kb8_s60275
1571	kb8_rep_c1584	kb8_rep_c40456	kb8_c50438
1572	kb8_rep_c1585	kb8_s67047
1573	kb8_rep_c1586	kb8_s57287
1574	kb8_rep_c1587	kb8_rep_c10544	kb8_rep_c23539	kb8_rep_c51272	kb8_rep_c51834	kb8_rep_c53065	kb8_rep_c55759	kb8_s56464	kb8_s57300	kb8_s58914	kb8_rep_c59211	kb8_rep_c60641	kb8_s62385	kb8_s68180
1575	kb8_rep_c1588	kb8_s60415
1576	kb8_rep_c1589	kb8_s61751	kb8_s69046	kb8_s70265
1578	kb8_rep_c1591	kb8_s67211
1580	kb8_rep_c1593	kb8_rep_c16670	kb8_s55712	kb8_s62855
1583	kb8_rep_c1596	kb8_s57589
1584	kb8_rep_c1597	kb8_s52248
1585	kb8_rep_c1598	kb8_s57014	kb8_s60483
1587	kb8_rep_c1600	kb8_s56468	kb8_s59096
1588	kb8_rep_c1601	kb8_rep_c48991
1589	kb8_rep_c1602	kb8_s67939
1590	kb8_rep_c1603	kb8_rep_c14173	kb8_rep_c58985
1592	kb8_rep_c1606	kb8_s63179
1595	kb8_rep_c1609	kb8_rep_c35485	kb8_rep_c51924	kb8_rep_c52181	kb8_rep_c54279	kb8_rep_c55498	kb8_s67455
1596	kb8_rep_c1610	kb8_rep_c29180	kb8_s52128	kb8_s65964
1598	kb8_rep_c1612	kb8_s56760	kb8_s71566
1600	kb8_rep_c1614	kb8_s52280	kb8_s53324
1601	kb8_rep_c1615	kb8_rep_c47878
1602	kb8_rep_c1616	kb8_rep_c32832	kb8_s58740
1603	kb8_rep_c1617	kb8_s57803
1604	kb8_rep_c1618	kb8_s57718
1606	kb8_rep_c1620	kb8_rep_c28392	kb8_s54773	kb8_rep_c59838
1607	kb8_rep_c1621	kb8_s57129	kb8_s58294	kb8_s59557
1608	kb8_rep_c1622	kb8_rep_c47970	kb8_s57647
1610	kb8_rep_c1624	kb8_rep_c52147	kb8_rep_c55390	kb8_rep_c57604
1611	kb8_rep_c1625	kb8_s64954
1614	kb8_rep_c1628	kb8_s69767
1615	kb8_rep_c1629	kb8_rep_c20680
1618	kb8_rep_c1632	kb8_rep_c9463	kb8_rep_c54931
1619	kb8_rep_c1633	kb8_s58516
1621	kb8_rep_c1635	kb8_rep_c40822
1622	kb8_rep_c1636	kb8_s71163
1623	kb8_rep_c1637	kb8_s57629	kb8_s62299
1625	kb8_rep_c1639	kb8_s52109
1631	kb8_rep_c1645	kb8_rep_c8563	kb8_rep_c18539	kb8_s63614
1632	kb8_rep_c1646	kb8_c18845	kb8_s60062	kb8_s66455
1635	kb8_rep_c1649	kb8_s69443
1636	kb8_rep_c1650	kb8_rep_c51322	kb8_s54862	kb8_s61922	kb8_rep_c64711	kb8_s71417
1637	kb8_rep_c1651	kb8_s54235	kb8_s61822
1638	kb8_rep_c1652	kb8_s58836
1643	kb8_rep_c1657	kb8_rep_c35173	kb8_s56355
1644	kb8_rep_c1658	kb8_rep_c49742
1646	kb8_rep_c1660	kb8_s56367
1647	kb8_rep_c1661	kb8_s60828
1648	kb8_rep_c1662	kb8_s54715	kb8_s56833	kb8_rep_c69660
1649	kb8_rep_c1663	kb8_s62395
1650	kb8_rep_c1664	kb8_s64679
1651	kb8_rep_c1665	kb8_rep_c33615
1652	kb8_rep_c1666	kb8_s65967
1655	kb8_rep_c1669	kb8_rep_c10059	kb8_rep_c52466	kb8_s71766
1656	kb8_rep_c1670	kb8_s66890
1657	kb8_rep_c1671	kb8_rep_c28357	kb8_s61339	kb8_s63360
1658	kb8_rep_c1672	kb8_s67280
1659	kb8_rep_c1673	kb8_s64412	kb8_s68160
1660	kb8_rep_c1674	kb8_s55442
1661	kb8_rep_c1676	kb8_s70884
1663	kb8_rep_c1678	kb8_s65777
1664	kb8_rep_c1679	kb8_s52402
1665	kb8_rep_c1680	kb8_s70688
1667	kb8_rep_c1682	kb8_s54944	kb8_rep_c56098	kb8_s63861
1670	kb8_rep_c1685	kb8_s57835	kb8_s66062
1672	kb8_rep_c1687	kb8_s53964	kb8_s60505	kb8_s67134
1673	kb8_rep_c1688	kb8_s65747	kb8_s69165
1674	kb8_rep_c1689	kb8_s67301
1677	kb8_rep_c1692	kb8_s69842
1678	kb8_rep_c1693	kb8_s70079
1679	kb8_rep_c1694	kb8_s52766	kb8_s65761
1681	kb8_rep_c1696	kb8_s60171
1684	kb8_rep_c1699	kb8_s67694
1685	kb8_rep_c1700	kb8_s59287
1686	kb8_rep_c1701	kb8_c41281	kb8_c54589	kb8_rep_c54784	kb8_rep_c55192	kb8_s58067	kb8_s58172	kb8_c58555	kb8_c58947	kb8_s59170	kb8_s62079	kb8_rep_c64026	kb8_s65330	kb8_s65770
1687	kb8_rep_c1702	kb8_s62562
1688	kb8_rep_c1703	kb8_s71978
1689	kb8_rep_c1704	kb8_s70510
1690	kb8_rep_c1705	kb8_rep_c24507
1692	kb8_rep_c1707	kb8_rep_c9282	kb8_rep_c32194	kb8_rep_c34720	kb8_rep_c53168	kb8_rep_c53231	kb8_rep_c54402	kb8_rep_c54414	kb8_rep_c59655	kb8_s59667	kb8_s61148	kb8_s71637
1693	kb8_rep_c1708	kb8_s63631	kb8_s66295
1697	kb8_rep_c1712	kb8_rep_c41257	kb8_s57899	kb8_s59944
1699	kb8_rep_c1714	kb8_rep_c10324
1700	kb8_rep_c1715	kb8_s62263
1704	kb8_rep_c1719	kb8_s65191
1705	kb8_rep_c1720	kb8_rep_c45031
1706	kb8_rep_c1721	kb8_s53920
1707	kb8_rep_c1722	kb8_s63100	kb8_s67477
1708	kb8_rep_c1723	kb8_s62985	kb8_s63058
1709	kb8_rep_c1724	kb8_s71751
1714	kb8_rep_c1729	kb8_s63311	kb8_s65218	kb8_s65566
1716	kb8_rep_c1731	kb8_s68326	kb8_s69663
1717	kb8_rep_c1732	kb8_rep_c34273	kb8_s54034	kb8_s71668
1722	kb8_rep_c1737	kb8_rep_c39412
1724	kb8_rep_c1739	kb8_s68031	kb8_s71784
1725	kb8_rep_c1740	kb8_s65036	kb8_s68467
1726	kb8_rep_c1741	kb8_c47993
1729	kb8_rep_c1744	kb8_s60277	kb8_s67781
1731	kb8_rep_c1746	kb8_s51929
1733	kb8_rep_c1748	kb8_rep_c53444	kb8_s53975	kb8_rep_c54501	kb8_s57753	kb8_s67060	kb8_s71035
1734	kb8_rep_c1749	kb8_s55203	kb8_s66228
1735	kb8_rep_c1750	kb8_rep_c7692	kb8_rep_c23441
1737	kb8_rep_c1752	kb8_s70282
1738	kb8_rep_c1753	kb8_s71554
1739	kb8_rep_c1754	kb8_s51252
1740	kb8_rep_c1755	kb8_s61051
1741	kb8_rep_c1756	kb8_rep_c51416	kb8_rep_c54739	kb8_s65804
1742	kb8_rep_c1757	kb8_rep_c42830
1743	kb8_rep_c1758	kb8_s57084
1744	kb8_rep_c1759	kb8_s58832
1745	kb8_rep_c1760	kb8_s56117	kb8_s68256
1747	kb8_rep_c1762	kb8_s59657
1750	kb8_rep_c1765	kb8_s63654
1751	kb8_rep_c1766	kb8_s60522
1753	kb8_rep_c1768	kb8_s63057
1754	kb8_rep_c1769	kb8_s58470	kb8_s71127
1755	kb8_rep_c1770	kb8_s61059
1756	kb8_rep_c1771	kb8_rep_c51721	kb8_rep_c53835	kb8_s58195
1757	kb8_rep_c1772	kb8_rep_c51584
1758	kb8_rep_c1773	kb8_s63334
1760	kb8_rep_c1775	kb8_rep_c35414
1763	kb8_rep_c1778	kb8_rep_c44775	kb8_s55212	kb8_s68014
1765	kb8_rep_c1780	kb8_s64287	kb8_s70668
1767	kb8_rep_c1782	kb8_s51241
1769	kb8_rep_c1784	kb8_s51935	kb8_s71288
1770	kb8_rep_c1785	kb8_s65438
1771	kb8_rep_c1786	kb8_rep_c47969	kb8_s70076
1772	kb8_rep_c1787	kb8_s64852
1774	kb8_rep_c1789	kb8_s69168
1775	kb8_rep_c1790	kb8_rep_c44782	kb8_s63511	kb8_s71942
1778	kb8_rep_c1793	kb8_s57162	kb8_s64289
1784	kb8_rep_c1799	kb8_rep_c35678
1785	kb8_rep_c1800	kb8_s52604	kb8_s54772
1788	kb8_rep_c1803	kb8_rep_c7907	kb8_rep_c56200
1792	kb8_rep_c1808	kb8_s67669
1793	kb8_rep_c1809	kb8_s58308	kb8_s61916
1794	kb8_rep_c1810	kb8_s60946	kb8_s67568
1795	kb8_rep_c1811	kb8_s54190
1796	kb8_rep_c1812	kb8_s64163	kb8_s67248
1797	kb8_rep_c1813	kb8_s62226
1798	kb8_rep_c1814	kb8_s61522
1799	kb8_rep_c1815	kb8_rep_c48796
1801	kb8_rep_c1817	kb8_rep_c56384	kb8_s72092
1802	kb8_rep_c1818	kb8_s57203
1803	kb8_rep_c1820	kb8_rep_c8542
1804	kb8_rep_c1821	kb8_s61938
1805	kb8_rep_c1822	kb8_s63276
1807	kb8_rep_c1824	kb8_rep_c46672	kb8_s67771
1809	kb8_rep_c1826	kb8_rep_c48288
1811	kb8_rep_c1828	kb8_s63846
1812	kb8_rep_c1829	kb8_rep_c38937
1815	kb8_rep_c1832	kb8_s56879
1816	kb8_rep_c1833	kb8_s53861	kb8_s69638
1817	kb8_rep_c1834	kb8_s63905
1819	kb8_rep_c1836	kb8_rep_c46876
1821	kb8_rep_c1838	kb8_s57055
1825	kb8_rep_c1842	kb8_rep_c47799
1826	kb8_rep_c1843	kb8_s66182
1828	kb8_rep_c1845	kb8_rep_c7013	kb8_rep_c51388	kb8_rep_c52245
1830	kb8_rep_c1847	kb8_s59716
1831	kb8_rep_c1848	kb8_c48190	kb8_s67903
1832	kb8_rep_c1849	kb8_s53817
1833	kb8_rep_c1850	kb8_rep_c49847	kb8_s62127
1836	kb8_rep_c1853	kb8_s59495
1838	kb8_rep_c1855	kb8_rep_c39898	kb8_rep_c48016	kb8_s52870	kb8_s55003	kb8_s67095
1842	kb8_rep_c1859	kb8_s63045	kb8_s64495	kb8_s65852
1846	kb8_rep_c1863	kb8_s55980
1848	kb8_rep_c1865	kb8_s53090
1849	kb8_rep_c1866	kb8_rep_c37866	kb8_rep_c51188	kb8_s51592	kb8_s63126	kb8_s66760
1850	kb8_rep_c1867	kb8_rep_c48829	kb8_s60908
1853	kb8_rep_c1870	kb8_rep_c49656
1855	kb8_rep_c1872	kb8_rep_c29048
1858	kb8_rep_c1875	kb8_s61715	kb8_s65100	kb8_s68502
1860	kb8_rep_c1877	kb8_rep_c38841	kb8_s61281
1861	kb8_rep_c1878	kb8_s70176
1862	kb8_rep_c1879	kb8_s52210	kb8_rep_c55088	kb8_s56006	kb8_s65382
1863	kb8_rep_c1880	kb8_rep_c25122	kb8_rep_c64853	kb8_s65522
1867	kb8_rep_c1884	kb8_s63381
1868	kb8_rep_c1885	kb8_s61981	kb8_s64582
1871	kb8_rep_c1888	kb8_s52342	kb8_s63916
1872	kb8_rep_c1889	kb8_rep_c22004
1873	kb8_rep_c1890	kb8_s60201
1874	kb8_rep_c1891	kb8_s57322	kb8_s64102
1878	kb8_rep_c1895	kb8_rep_c8665	kb8_s71938
1882	kb8_rep_c1899	kb8_rep_c38783
1883	kb8_rep_c1900	kb8_rep_c8846	kb8_rep_c38572	kb8_rep_c51639
1885	kb8_rep_c1902	kb8_rep_c14319	kb8_s51404	kb8_s59694
1887	kb8_rep_c1904	kb8_rep_c42514
1890	kb8_rep_c1907	kb8_c40386
1891	kb8_rep_c1908	kb8_s70246
1892	kb8_rep_c1909	kb8_s59642	kb8_s69620
1893	kb8_rep_c1910	kb8_rep_c16957
1894	kb8_rep_c1911	kb8_s72062
1896	kb8_rep_c1913	kb8_rep_c18787
1897	kb8_rep_c1914	kb8_rep_c6625	kb8_rep_c47422	kb8_rep_c54579	kb8_s67157
1898	kb8_rep_c1915	kb8_rep_c24313	kb8_s67755
1901	kb8_rep_c1918	kb8_rep_c48485
1904	kb8_rep_c1921	kb8_s66246
1907	kb8_rep_c1924	kb8_s69255
1909	kb8_rep_c1926	kb8_rep_c26610	kb8_s52497	kb8_s53772
1914	kb8_rep_c1931	kb8_s56156
1916	kb8_rep_c1933	kb8_s52843	kb8_s58930	kb8_s60635
1917	kb8_rep_c1934	kb8_s64759
1919	kb8_rep_c1936	kb8_s61614
1920	kb8_rep_c1937	kb8_rep_c39947
1921	kb8_rep_c1938	kb8_c50273	kb8_s59312
1922	kb8_rep_c1939	kb8_s61182	kb8_s66580
1926	kb8_rep_c1943	kb8_s62117	kb8_s66448
1927	kb8_rep_c1944	kb8_s71138
1928	kb8_rep_c1945	kb8_c27755	kb8_s67796
1930	kb8_rep_c1947	kb8_rep_c52203
1931	kb8_rep_c1948	kb8_rep_c21339	kb8_s55160
1933	kb8_rep_c1950	kb8_s63368
1934	kb8_rep_c1951	kb8_s54675
1935	kb8_rep_c1952	kb8_rep_c9878	kb8_rep_c31503	kb8_rep_c44488	kb8_rep_c53422	kb8_rep_c55147	kb8_rep_c57267	kb8_s65647	kb8_rep_c66636	kb8_s67742	kb8_s71443
1936	kb8_rep_c1953	kb8_rep_c55703
1937	kb8_rep_c1954	kb8_s56960	kb8_s58572	kb8_s65088
1939	kb8_rep_c1956	kb8_s55885
1940	kb8_rep_c1957	kb8_s59161	kb8_rep_c60620
1945	kb8_rep_c1962	kb8_s65298
1946	kb8_rep_c1963	kb8_rep_c51894
1948	kb8_rep_c1965	kb8_s61143
1950	kb8_rep_c1967	kb8_s58188
1951	kb8_rep_c1968	kb8_s65960
1953	kb8_rep_c1970	kb8_s58242
1954	kb8_rep_c1971	kb8_rep_c44606	kb8_s59263
1955	kb8_rep_c1972	kb8_s59735
1958	kb8_rep_c1975	kb8_s57190
1966	kb8_rep_c1983	kb8_s64082
1970	kb8_rep_c1987	kb8_s65592
1974	kb8_rep_c1991	kb8_s70737
1978	kb8_rep_c1995	kb8_s54288
1979	kb8_rep_c1996	kb8_s65661
1980	kb8_rep_c1997	kb8_c48295	kb8_s67989	kb8_s68312
1981	kb8_rep_c1998	kb8_rep_c32089
1982	kb8_rep_c1999	kb8_rep_c56959
1984	kb8_rep_c2001	kb8_s69451
1987	kb8_rep_c2005	kb8_rep_c39012	kb8_rep_c51548
1992	kb8_rep_c2010	kb8_s62716
1994	kb8_rep_c2012	kb8_s59204
1995	kb8_rep_c2013	kb8_rep_c51828	kb8_s66914
1999	kb8_rep_c2017	kb8_rep_c19048	kb8_rep_c24719	kb8_rep_c27221	kb8_s63340
2000	kb8_rep_c2018	kb8_rep_c46290
2003	kb8_rep_c2021	kb8_s56944
2005	kb8_rep_c2023	kb8_s65972	kb8_s68648
2007	kb8_rep_c2025	kb8_rep_c7109	kb8_rep_c19087	kb8_rep_c36582	kb8_c50392
2008	kb8_rep_c2026	kb8_s65104
2009	kb8_rep_c2027	kb8_s63874	kb8_s66937
2011	kb8_rep_c2029	kb8_rep_c41881	kb8_rep_c45371	kb8_rep_c50646	kb8_rep_c51422	kb8_rep_c52403	kb8_rep_c52570	kb8_rep_c53144	kb8_s53450	kb8_s55058	kb8_rep_c55294	kb8_rep_c57236	kb8_s60932
2013	kb8_rep_c2031	kb8_s62032
2016	kb8_rep_c2034	kb8_s59725
2017	kb8_rep_c2035	kb8_rep_c30972	kb8_s58377
2018	kb8_rep_c2036	kb8_s67031
2019	kb8_rep_c2037	kb8_s52561	kb8_s54391
2020	kb8_rep_c2038	kb8_s51983
2021	kb8_rep_c2039	kb8_s71915
2022	kb8_rep_c2040	kb8_s54072	kb8_s69244
2023	kb8_rep_c2041	kb8_rep_c33305
2025	kb8_rep_c2043	kb8_s59462
2031	kb8_rep_c2050	kb8_rep_c48936	kb8_rep_c50575	kb8_s53363	kb8_s54639	kb8_s56777	kb8_rep_c59819	kb8_s70492	kb8_s71157	kb8_s71404
2032	kb8_rep_c2051	kb8_rep_c34685
2033	kb8_rep_c2052	kb8_s58522
2034	kb8_rep_c2053	kb8_s65890
2035	kb8_rep_c2054	kb8_rep_c31959	kb8_s68124	kb8_s70923
2036	kb8_rep_c2055	kb8_s55144
2037	kb8_rep_c2056	kb8_s55358	kb8_s68596
2038	kb8_rep_c2057	kb8_s54150
2040	kb8_rep_c2059	kb8_s55345
2042	kb8_rep_c2061	kb8_s67241
2043	kb8_rep_c2062	kb8_rep_c41586	kb8_s57454
2050	kb8_rep_c2069	kb8_s60386	kb8_s66204
2054	kb8_rep_c2073	kb8_s66911
2055	kb8_rep_c2074	kb8_s59320
2056	kb8_rep_c2075	kb8_s68866
2058	kb8_rep_c2077	kb8_rep_c40695	kb8_s54856
2063	kb8_rep_c2082	kb8_s53064	kb8_rep_c57457	kb8_s69774
2069	kb8_rep_c2088	kb8_s55009	kb8_s56361	kb8_s67881
2070	kb8_rep_c2089	kb8_s59631
2072	kb8_rep_c2091	kb8_s54546
2073	kb8_rep_c2092	kb8_s61528	kb8_s65707
2074	kb8_rep_c2093	kb8_s64648
2076	kb8_rep_c2095	kb8_rep_c41270	kb8_rep_c48887
2077	kb8_rep_c2096	kb8_s71785
2079	kb8_rep_c2098	kb8_rep_c14139	kb8_rep_c41056	kb8_rep_c52390	kb8_rep_c53077	kb8_rep_c53500	kb8_s53968	kb8_s55501	kb8_s57357	kb8_s57499	kb8_rep_c58550	kb8_s61034	kb8_s62010	kb8_s65230	kb8_s65994	kb8_s68129	kb8_s69775
2081	kb8_rep_c2100	kb8_s63239	kb8_s66450
2082	kb8_rep_c2101	kb8_rep_c11287
2084	kb8_rep_c2103	kb8_s52853
2087	kb8_rep_c2106	kb8_rep_c11583	kb8_rep_c38102
2088	kb8_rep_c2107	kb8_s52352
2090	kb8_rep_c2109	kb8_s60764	kb8_s60962
2094	kb8_rep_c2113	kb8_rep_c38088	kb8_rep_c43759	kb8_s54580	kb8_s65473
2095	kb8_rep_c2114	kb8_s57924
2099	kb8_rep_c2118	kb8_s57117	kb8_s64212
2100	kb8_rep_c2119	kb8_s69801
2101	kb8_rep_c2120	kb8_s59677	kb8_s67870	kb8_s70454
2103	kb8_rep_c2122	kb8_rep_c24275	kb8_rep_c38986
2104	kb8_rep_c2123	kb8_s54519	kb8_s58614
2108	kb8_rep_c2127	kb8_rep_c5882	kb8_s64349
2109	kb8_rep_c2128	kb8_rep_c26028	kb8_rep_c48653	kb8_rep_c62110	kb8_s63998	kb8_s66730	kb8_s71070
2110	kb8_rep_c2129	kb8_s53101	kb8_s70705
2112	kb8_rep_c2131	kb8_rep_c41339	kb8_rep_c43523	kb8_s63617	kb8_s67788
2116	kb8_rep_c2135	kb8_s55887
2117	kb8_rep_c2136	kb8_s71958
2118	kb8_rep_c2137	kb8_s56834
2120	kb8_rep_c2139	kb8_rep_c13383	kb8_rep_c35546	kb8_s52368	kb8_s59027
2121	kb8_rep_c2140	kb8_s56515	kb8_s60358
2125	kb8_rep_c2144	kb8_s70708
2126	kb8_rep_c2145	kb8_s67470
2127	kb8_rep_c2146	kb8_s52924	kb8_s58031	kb8_s60771	kb8_s62895
2128	kb8_rep_c2147	kb8_s63416
2135	kb8_rep_c2154	kb8_s60450
2136	kb8_rep_c2155	kb8_s53513	kb8_s70219
2137	kb8_rep_c2156	kb8_s63403	kb8_s64651
2138	kb8_rep_c2157	kb8_rep_c24666	kb8_rep_c45618	kb8_s53451	kb8_s54336	kb8_s59599	kb8_rep_c63076	kb8_s67772
2139	kb8_rep_c2158	kb8_s65181
2144	kb8_rep_c2163	kb8_s63021	kb8_s64713
2145	kb8_rep_c2164	kb8_s44191	kb8_s67008	kb8_s68473
2146	kb8_rep_c2165	kb8_s55935	kb8_s66055
2150	kb8_rep_c2169	kb8_s60235
2154	kb8_rep_c2173	kb8_s57799
2156	kb8_rep_c2175	kb8_s56750
2159	kb8_rep_c2178	kb8_s56196
2161	kb8_rep_c2180	kb8_s63683
2166	kb8_rep_c2185	kb8_s51868
2167	kb8_rep_c2186	kb8_rep_c25261	kb8_s56307	kb8_s60756	kb8_s63337	kb8_s64869	kb8_s65871	kb8_s66948
2171	kb8_rep_c2190	kb8_s58337
2172	kb8_rep_c2191	kb8_s54445
2175	kb8_rep_c2194	kb8_s55113	kb8_s57221	kb8_s59190
2177	kb8_rep_c2196	kb8_rep_c4332	kb8_rep_c12406	kb8_s51246
2179	kb8_rep_c2198	kb8_s58477
2180	kb8_rep_c2199	kb8_s69926
2181	kb8_rep_c2200	kb8_s57930
2182	kb8_rep_c2201	kb8_rep_c38449	kb8_s60638
2183	kb8_rep_c2202	kb8_s52110
2184	kb8_rep_c2203	kb8_s68812
2186	kb8_rep_c2205	kb8_s56766
2189	kb8_rep_c2208	kb8_rep_c34690
2190	kb8_rep_c2209	kb8_s62707
2192	kb8_rep_c2211	kb8_s55173
2196	kb8_rep_c2215	kb8_rep_c51321	kb8_rep_c52384	kb8_rep_c52854	kb8_rep_c52936	kb8_rep_c53087	kb8_rep_c53222	kb8_rep_c53593	kb8_rep_c54135	kb8_rep_c54562	kb8_rep_c55513	kb8_rep_c55673	kb8_rep_c55875	kb8_s55905	kb8_rep_c56711	kb8_rep_c57601	kb8_s58359	kb8_s63518	kb8_s68358
2198	kb8_rep_c2217	kb8_rep_c37374	kb8_s53465	kb8_s70910
2200	kb8_rep_c2219	kb8_s68387
2201	kb8_rep_c2220	kb8_s54985
2202	kb8_rep_c2221	kb8_s68683
2203	kb8_rep_c2222	kb8_s57459
2204	kb8_rep_c2223	kb8_rep_c43336	kb8_s63356
2205	kb8_rep_c2224	kb8_s59732
2206	kb8_rep_c2225	kb8_s60697
2207	kb8_rep_c2226	kb8_rep_c40200	kb8_s44479	kb8_rep_c44801	kb8_rep_c47150	kb8_s56375	kb8_s64408	kb8_s68041	kb8_s70906
2209	kb8_rep_c2228	kb8_s64769
2215	kb8_rep_c2234	kb8_c32153	kb8_rep_c49747	kb8_s54356
2219	kb8_rep_c2238	kb8_s68915
2220	kb8_rep_c2239	kb8_rep_c19106	kb8_s53641	kb8_s58303
2221	kb8_rep_c2240	kb8_rep_c29279	kb8_s60669
2222	kb8_rep_c2241	kb8_s57694	kb8_s61226
2223	kb8_rep_c2242	kb8_s52772
2224	kb8_rep_c2243	kb8_s60477
2226	kb8_rep_c2245	kb8_rep_c23699
2232	kb8_rep_c2251	kb8_rep_c11401	kb8_c50069
2233	kb8_rep_c2252	kb8_s71008
2234	kb8_rep_c2253	kb8_s55863	kb8_s64569
2238	kb8_rep_c2257	kb8_s60112
2239	kb8_rep_c2258	kb8_rep_c42188
2240	kb8_rep_c2259	kb8_rep_c47377
2243	kb8_rep_c2262	kb8_c50691	kb8_s51766	kb8_s58264	kb8_s64959
2245	kb8_rep_c2264	kb8_s67002
2246	kb8_rep_c2265	kb8_rep_c69708
2253	kb8_rep_c2272	kb8_s59378
2254	kb8_rep_c2273	kb8_s53423
2255	kb8_rep_c2274	kb8_c47683	kb8_s56891	kb8_s71992
2256	kb8_rep_c2275	kb8_rep_c4349	kb8_rep_c6061	kb8_rep_c23661	kb8_rep_c45804	kb8_rep_c51350	kb8_rep_c51455	kb8_rep_c52841	kb8_rep_c54859	kb8_rep_c55258	kb8_rep_c58095	kb8_s70366
2259	kb8_rep_c2278	kb8_rep_c10778	kb8_rep_c13851	kb8_rep_c19833	kb8_rep_c26301	kb8_rep_c51720	kb8_rep_c52150	kb8_rep_c52554	kb8_s53008	kb8_rep_c53453	kb8_rep_c57402	kb8_rep_c59226	kb8_s61662	kb8_s63723
2261	kb8_rep_c2280	kb8_s55094
2262	kb8_rep_c2281	kb8_s58778
2264	kb8_rep_c2283	kb8_s66134
2266	kb8_rep_c2285	kb8_rep_c50927
2267	kb8_rep_c2286	kb8_rep_c22897	kb8_c37191	kb8_rep_c56428	kb8_rep_c58876	kb8_s63718	kb8_s70565
2269	kb8_rep_c2288	kb8_s54792	kb8_s71867
2270	kb8_rep_c2289	kb8_s58330
2273	kb8_rep_c2292	kb8_s72139
2274	kb8_rep_c2293	kb8_s60788
2275	kb8_rep_c2294	kb8_s53491	kb8_s56097	kb8_s67692
2278	kb8_rep_c2297	kb8_s56242
2279	kb8_rep_c2298	kb8_s56815	kb8_s71352
2280	kb8_rep_c2299	kb8_s68772
2281	kb8_rep_c2300	kb8_s54090
2283	kb8_rep_c2302	kb8_s59291
2285	kb8_rep_c2304	kb8_rep_c55750	kb8_rep_c59740
2286	kb8_rep_c2305	kb8_rep_c40772
2287	kb8_rep_c2306	kb8_s58704
2288	kb8_rep_c2307	kb8_s67954
2289	kb8_rep_c2308	kb8_rep_c9530	kb8_s64864	kb8_s69157
2292	kb8_rep_c2311	kb8_s64450
2293	kb8_rep_c2312	kb8_s68060
2295	kb8_rep_c2314	kb8_s58903
2296	kb8_rep_c2315	kb8_s56108	kb8_s67723	kb8_s69554
2297	kb8_rep_c2316	kb8_rep_c18565	kb8_s69290
2299	kb8_rep_c2318	kb8_s59967
2301	kb8_rep_c2320	kb8_rep_c47468	kb8_s71574
2305	kb8_rep_c2324	kb8_rep_c7198	kb8_rep_c7363
2308	kb8_rep_c2327	kb8_c46162
2311	kb8_rep_c2330	kb8_rep_c42159
2312	kb8_rep_c2331	kb8_s67218
2313	kb8_rep_c2332	kb8_s65082	kb8_s70753
2317	kb8_rep_c2336	kb8_s69670
2319	kb8_rep_c2338	kb8_rep_c16880	kb8_rep_c20318	kb8_rep_c51516	kb8_s51610	kb8_rep_c51784	kb8_s52370	kb8_rep_c53473	kb8_rep_c53667	kb8_s55274	kb8_s58970
2321	kb8_rep_c2340	kb8_s56580
2323	kb8_rep_c2342	kb8_s70609	kb8_s71562
2324	kb8_rep_c2343	kb8_s60602
2326	kb8_rep_c2345	kb8_s64619
2327	kb8_rep_c2346	kb8_s55010
2333	kb8_rep_c2352	kb8_rep_c41083	kb8_s62321	kb8_s65374
2336	kb8_rep_c2355	kb8_s62115
2337	kb8_rep_c2356	kb8_s66708	kb8_s67094
2338	kb8_rep_c2357	kb8_s62071
2340	kb8_rep_c2359	kb8_rep_c6268	kb8_c45181	kb8_s63180
2341	kb8_rep_c2360	kb8_s62619
2343	kb8_rep_c2362	kb8_s60069
2346	kb8_rep_c2365	kb8_s60158	kb8_s66869
2351	kb8_rep_c2370	kb8_s51955	kb8_s64669
2353	kb8_rep_c2372	kb8_s57627
2356	kb8_rep_c2375	kb8_s51893	kb8_s54971
2357	kb8_rep_c2376	kb8_rep_c48541	kb8_s61003
2358	kb8_rep_c2377	kb8_s64485
2360	kb8_rep_c2379	kb8_c50722
2364	kb8_rep_c2383	kb8_s52827	kb8_s57833
2368	kb8_rep_c2387	kb8_s58339	kb8_s69112
2369	kb8_rep_c2388	kb8_s68409
2372	kb8_rep_c2391	kb8_rep_c16737	kb8_rep_c51743	kb8_s54740	kb8_s57439	kb8_s65963
2374	kb8_rep_c2393	kb8_s52845
2375	kb8_rep_c2394	kb8_s64540
2377	kb8_rep_c2396	kb8_s55453
2378	kb8_rep_c2397	kb8_s64411
2379	kb8_rep_c2398	kb8_rep_c6237
2380	kb8_rep_c2400	kb8_s66922
2381	kb8_rep_c2401	kb8_rep_c32739
2382	kb8_rep_c2402	kb8_c39870
2385	kb8_rep_c2405	kb8_rep_c56992
2391	kb8_rep_c2411	kb8_s53434
2392	kb8_rep_c2412	kb8_s54914
2393	kb8_rep_c2413	kb8_s71726
2394	kb8_rep_c2414	kb8_rep_c42635
2398	kb8_rep_c2418	kb8_s60070
2399	kb8_rep_c2419	kb8_rep_c59007
2402	kb8_rep_c2422	kb8_s51870
2405	kb8_rep_c2425	kb8_s53745	kb8_s67174
2406	kb8_rep_c2426	kb8_rep_c49261	kb8_s71699
2408	kb8_rep_c2428	kb8_s67688
2410	kb8_rep_c2430	kb8_s59237
2414	kb8_rep_c2434	kb8_s54388
2415	kb8_rep_c2435	kb8_s62566
2417	kb8_rep_c2437	kb8_s62935
2418	kb8_rep_c2438	kb8_s71078
2419	kb8_rep_c2439	kb8_rep_c11567	kb8_rep_c20002	kb8_rep_c48890
2420	kb8_rep_c2440	kb8_s69162
2421	kb8_rep_c2441	kb8_rep_c30384	kb8_s63671
2422	kb8_rep_c2442	kb8_s53742
2423	kb8_rep_c2443	kb8_s71783
2424	kb8_rep_c2444	kb8_rep_c36417	kb8_s54265
2425	kb8_rep_c2445	kb8_s52913
2426	kb8_rep_c2446	kb8_s52681
2427	kb8_rep_c2447	kb8_rep_c50173	kb8_s62666
2428	kb8_rep_c2448	kb8_s63658	kb8_s66630
2429	kb8_rep_c2449	kb8_s54415
2431	kb8_rep_c2451	kb8_s44634	kb8_rep_c49662	kb8_s64980	kb8_s65474
2432	kb8_rep_c2452	kb8_rep_c35273	kb8_s64309
2433	kb8_rep_c2453	kb8_s58803
2435	kb8_rep_c2455	kb8_s70937
2436	kb8_rep_c2456	kb8_rep_c10205	kb8_s51407	kb8_s67310
2438	kb8_rep_c2458	kb8_s57297
2439	kb8_rep_c2459	kb8_rep_c19716	kb8_s71331
2440	kb8_rep_c2460	kb8_rep_c14586	kb8_rep_c26855	kb8_s51383
2443	kb8_rep_c2463	kb8_rep_c4826	kb8_rep_c44942	kb8_s56161
2444	kb8_rep_c2464	kb8_s67431
2446	kb8_rep_c2466	kb8_rep_c14433
2447	kb8_rep_c2467	kb8_rep_c35674
2448	kb8_rep_c2468	kb8_s51386	kb8_s60934	kb8_s67526
2450	kb8_rep_c2470	kb8_s65454	kb8_s67376
2452	kb8_rep_c2472	kb8_s67138
2453	kb8_rep_c2473	kb8_rep_c22907
2456	kb8_rep_c2476	kb8_s53176
2457	kb8_rep_c2477	kb8_s55583	kb8_s57590
2458	kb8_rep_c2478	kb8_s67528
2459	kb8_rep_c2479	kb8_s56278
2462	kb8_rep_c2482	kb8_rep_c34075	kb8_s61279	kb8_s63097	kb8_s68699	kb8_s69777
2464	kb8_rep_c2484	kb8_s51840
2465	kb8_rep_c2485	kb8_s56366	kb8_s60565
2466	kb8_rep_c2486	kb8_rep_c24885
2468	kb8_rep_c2488	kb8_s59049
2469	kb8_rep_c2489	kb8_s60280
2470	kb8_rep_c2490	kb8_s68289
2471	kb8_rep_c2491	kb8_s63780	kb8_s67521
2474	kb8_rep_c2494	kb8_rep_c52633	kb8_rep_c56169	kb8_s69239
2475	kb8_rep_c2495	kb8_s61555
2477	kb8_rep_c2497	kb8_s54783
2478	kb8_rep_c2498	kb8_s69800
2484	kb8_rep_c2504	kb8_rep_c53114	kb8_rep_c55246	kb8_s67365
2485	kb8_rep_c2505	kb8_rep_c33696	kb8_s57160
2487	kb8_rep_c2507	kb8_s65025
2490	kb8_rep_c2510	kb8_rep_c43913	kb8_s65883
2491	kb8_rep_c2511	kb8_rep_c17591	kb8_rep_c25171	kb8_s56245	kb8_s56334	kb8_s67294
2492	kb8_rep_c2512	kb8_c56164	kb8_s56836	kb8_rep_c58284	kb8_rep_c63065	kb8_c63973	kb8_c65070	kb8_s65580	kb8_s66400	kb8_s68310
2493	kb8_rep_c2514	kb8_s69476
2498	kb8_rep_c2519	kb8_rep_c17978
2499	kb8_rep_c2520	kb8_rep_c49867	kb8_rep_c58830
2502	kb8_rep_c2523	kb8_s56972
2505	kb8_rep_c2526	kb8_rep_c5727
2506	kb8_rep_c2527	kb8_rep_c47866
2508	kb8_rep_c2529	kb8_rep_c19446
2510	kb8_rep_c2531	kb8_s51458	kb8_s66057
2511	kb8_rep_c2532	kb8_s61716	kb8_s62772
2512	kb8_rep_c2533	kb8_s53597
2513	kb8_rep_c2534	kb8_rep_c21292
2516	kb8_rep_c2537	kb8_s52331
2519	kb8_rep_c2540	kb8_rep_c49900
2520	kb8_rep_c2541	kb8_s56405
2522	kb8_rep_c2543	kb8_s57275
2523	kb8_rep_c2544	kb8_s51626
2527	kb8_rep_c2549	kb8_s62022
2530	kb8_rep_c2553	kb8_s56835	kb8_s59596	kb8_s69210
2533	kb8_rep_c2556	kb8_s52324	kb8_s61039
2534	kb8_rep_c2557	kb8_s64514
2535	kb8_rep_c2558	kb8_s64568
2536	kb8_rep_c2559	kb8_rep_c40183	kb8_s67577
2543	kb8_rep_c2566	kb8_s48124	kb8_s68165
2544	kb8_rep_c2567	kb8_s69434
2546	kb8_rep_c2569	kb8_s53236	kb8_s67003
2551	kb8_rep_c2574	kb8_s64454
2556	kb8_rep_c2579	kb8_s68096	kb8_s71241
2560	kb8_rep_c2583	kb8_rep_c33493	kb8_s51738
2562	kb8_rep_c2585	kb8_s64311
2563	kb8_rep_c2586	kb8_rep_c12114	kb8_s68063
2564	kb8_rep_c2587	kb8_s53333
2567	kb8_rep_c2590	kb8_rep_c32484	kb8_rep_c46978	kb8_s67977
2568	kb8_rep_c2591	kb8_s63498
2573	kb8_rep_c2596	kb8_rep_c48347	kb8_s68214	kb8_s71983
2575	kb8_rep_c2598	kb8_s64666
2576	kb8_rep_c2599	kb8_rep_c43128	kb8_rep_c43666	kb8_s69872
2577	kb8_rep_c2600	kb8_s63038
2578	kb8_rep_c2601	kb8_s70457
2582	kb8_rep_c2605	kb8_rep_c25047
2584	kb8_rep_c2607	kb8_s60188
2585	kb8_rep_c2608	kb8_rep_c48508	kb8_s59792
2586	kb8_rep_c2609	kb8_rep_c26088	kb8_s60679
2587	kb8_rep_c2610	kb8_rep_c48861	kb8_s51239	kb8_s53761	kb8_s56441	kb8_s68979
2588	kb8_rep_c2611	kb8_s65023	kb8_s68085
2589	kb8_rep_c2612	kb8_s64420
2590	kb8_rep_c2613	kb8_rep_c6267	kb8_rep_c8107	kb8_rep_c25885	kb8_rep_c44216	kb8_s53987	kb8_rep_c54312	kb8_s55964	kb8_rep_c56365	kb8_s61859	kb8_s61996	kb8_rep_c65733	kb8_s68776
2591	kb8_rep_c2614	kb8_s69693
2592	kb8_rep_c2615	kb8_s57159
2595	kb8_rep_c2618	kb8_s68628
2597	kb8_rep_c2620	kb8_s65387
2600	kb8_rep_c2623	kb8_rep_c26124	kb8_rep_c45231	kb8_rep_c55562	kb8_s55927	kb8_rep_c66747
2601	kb8_rep_c2624	kb8_s55015
2602	kb8_rep_c2625	kb8_s64863
2604	kb8_rep_c2627	kb8_s53922	kb8_s71662
2607	kb8_rep_c2630	kb8_s51631
2610	kb8_rep_c2633	kb8_rep_c15566	kb8_rep_c57044	kb8_s61005
2612	kb8_rep_c2635	kb8_c42177
2615	kb8_rep_c2638	kb8_s54180
2618	kb8_rep_c2641	kb8_s67522
2622	kb8_rep_c2645	kb8_c51163	kb8_s62893	kb8_s63832
2625	kb8_rep_c2648	kb8_s62938	kb8_s66934
2626	kb8_rep_c2649	kb8_s53825
2629	kb8_rep_c2652	kb8_s56809	kb8_s57740
2632	kb8_rep_c2655	kb8_rep_c16320	kb8_rep_c54535	kb8_s54871	kb8_s62344	kb8_s68040
2633	kb8_rep_c2656	kb8_s55353
2634	kb8_rep_c2657	kb8_s58730
2636	kb8_rep_c2659	kb8_s55991
2640	kb8_rep_c2663	kb8_s59427
2642	kb8_rep_c2665	kb8_s51480	kb8_s64291
2643	kb8_rep_c2666	kb8_s69599
2645	kb8_rep_c2668	kb8_s54243
2646	kb8_rep_c2669	kb8_s51446	kb8_s63418
2651	kb8_rep_c2674	kb8_c50360	kb8_s58563	kb8_s59895	kb8_s65177
2652	kb8_rep_c2675	kb8_s56274	kb8_s70057
2655	kb8_rep_c2678	kb8_rep_c33193
2656	kb8_rep_c2679	kb8_rep_c47873	kb8_s71885
2657	kb8_rep_c2680	kb8_rep_c40401	kb8_rep_c46998	kb8_rep_c49016	kb8_s60665
2658	kb8_rep_c2681	kb8_s68870	kb8_s70641
2659	kb8_rep_c2682	kb8_s63870
2663	kb8_rep_c2687	kb8_s59383
2664	kb8_rep_c2688	kb8_s55695
2667	kb8_rep_c2691	kb8_c31118
2670	kb8_rep_c2694	kb8_rep_c46593	kb8_s61062
2671	kb8_rep_c2695	kb8_rep_c10717	kb8_rep_c52846	kb8_rep_c58360	kb8_s59618	kb8_s67015
2674	kb8_rep_c2698	kb8_s62561
2676	kb8_rep_c2700	kb8_s55531	kb8_s68535
2677	kb8_rep_c2701	kb8_s59583
2678	kb8_rep_c2702	kb8_s56238	kb8_s63442
2680	kb8_rep_c2704	kb8_s64565
2681	kb8_rep_c2705	kb8_s56579
2684	kb8_rep_c2708	kb8_s70895
2686	kb8_rep_c2710	kb8_s60078	kb8_s61135
2688	kb8_rep_c2712	kb8_rep_c49815
2690	kb8_rep_c2714	kb8_s52478
2692	kb8_rep_c2716	kb8_s69644
2694	kb8_rep_c2718	kb8_rep_c39364
2699	kb8_rep_c2723	kb8_s57980
2700	kb8_rep_c2724	kb8_s61017
2701	kb8_rep_c2725	kb8_c30976	kb8_s64621
2706	kb8_rep_c2730	kb8_s66819
2709	kb8_rep_c2733	kb8_s60544
2713	kb8_rep_c2737	kb8_s64104
2715	kb8_rep_c2739	kb8_s67990
2716	kb8_rep_c2740	kb8_rep_c50181
2717	kb8_rep_c2741	kb8_rep_c46877
2719	kb8_rep_c2743	kb8_rep_c23289
2720	kb8_rep_c2744	kb8_rep_c50303
2724	kb8_rep_c2748	kb8_s60592
2725	kb8_rep_c2749	kb8_s53675	kb8_s54134	kb8_s55880
2729	kb8_rep_c2753	kb8_s66429
2730	kb8_rep_c2754	kb8_rep_c46461	kb8_rep_c51216	kb8_rep_c52256	kb8_rep_c52886	kb8_rep_c52904	kb8_s52948	kb8_rep_c58405
2731	kb8_rep_c2755	kb8_s58113
2732	kb8_rep_c2756	kb8_rep_c32483	kb8_s57161
2736	kb8_rep_c2760	kb8_s69280
2737	kb8_rep_c2761	kb8_s53740	kb8_s57418	kb8_s58789	kb8_s68753
2738	kb8_rep_c2762	kb8_s60858	kb8_s68400
2740	kb8_rep_c2764	kb8_s61825
2741	kb8_rep_c2765	kb8_c48205
2758	kb8_rep_c2783	kb8_rep_c47449	kb8_s64157
2759	kb8_rep_c2784	kb8_rep_c15764
2760	kb8_rep_c2785	kb8_s55862	kb8_s57637	kb8_s62264
2762	kb8_rep_c2787	kb8_s60279
2763	kb8_rep_c2788	kb8_rep_c44399	kb8_rep_c44925	kb8_s57574	kb8_s66447
2764	kb8_rep_c2789	kb8_s58811	kb8_s59602
2765	kb8_rep_c2790	kb8_s66827
2769	kb8_rep_c2794	kb8_rep_c42162
2770	kb8_rep_c2795	kb8_s67487
2774	kb8_rep_c2799	kb8_rep_c15001	kb8_rep_c18902	kb8_rep_c53502	kb8_rep_c53713	kb8_rep_c53813	kb8_s55488	kb8_s56194	kb8_s63811	kb8_rep_c63862	kb8_s64958
2775	kb8_rep_c2800	kb8_rep_c38897
2776	kb8_rep_c2801	kb8_s61925	kb8_s67308
2778	kb8_rep_c2803	kb8_s54229
2780	kb8_rep_c2805	kb8_s63369
2782	kb8_rep_c2807	kb8_rep_c39987	kb8_s67075
2785	kb8_rep_c2810	kb8_s56213
2786	kb8_rep_c2811	kb8_s70022
2787	kb8_rep_c2812	kb8_s60439
2788	kb8_rep_c2813	kb8_s61588	kb8_s67326	kb8_rep_c67424	kb8_s71859
2790	kb8_rep_c2815	kb8_s66830	kb8_s69151
2791	kb8_rep_c2816	kb8_s53148
2792	kb8_rep_c2817	kb8_rep_c36309	kb8_rep_c40879
2794	kb8_rep_c2819	kb8_s52534	kb8_s61896	kb8_s71941
2795	kb8_rep_c2820	kb8_s60722	kb8_s70294
2796	kb8_rep_c2821	kb8_rep_c24852	kb8_s66117
2799	kb8_rep_c2824	kb8_s66560
2801	kb8_rep_c2827	kb8_s64003
2802	kb8_rep_c2828	kb8_s62179	kb8_s65651
2803	kb8_rep_c2829	kb8_rep_c3792	kb8_rep_c31164	kb8_rep_c56783	kb8_rep_c58922
2804	kb8_rep_c2830	kb8_s55942
2806	kb8_rep_c2832	kb8_s69583
2808	kb8_rep_c2834	kb8_rep_c9314	kb8_rep_c29868	kb8_rep_c34326	kb8_rep_c41590	kb8_rep_c42532	kb8_s57272	kb8_s60147
2811	kb8_rep_c2837	kb8_s56148
2812	kb8_rep_c2838	kb8_s51874	kb8_s63384
2814	kb8_rep_c2840	kb8_s59671
2815	kb8_rep_c2841	kb8_s64089
2816	kb8_rep_c2842	kb8_rep_c32069
2817	kb8_rep_c2843	kb8_s52454
2819	kb8_rep_c2845	kb8_rep_c44670	kb8_s68551	kb8_s71191
2822	kb8_rep_c2848	kb8_s59238	kb8_s65286
2823	kb8_rep_c2849	kb8_s70414
2824	kb8_rep_c2850	kb8_s58162
2825	kb8_rep_c2851	kb8_rep_c52751	kb8_s65357
2826	kb8_rep_c2852	kb8_rep_c22471	kb8_rep_c27375	kb8_s59435	kb8_s61657
2831	kb8_rep_c2857	kb8_rep_c40210	kb8_s66063
2837	kb8_rep_c2863	kb8_s67494
2840	kb8_rep_c2866	kb8_s65854
2841	kb8_rep_c2867	kb8_rep_c43496
2842	kb8_rep_c2868	kb8_rep_c18207	kb8_s60656	kb8_s66752
2845	kb8_rep_c2871	kb8_s60487
2846	kb8_rep_c2872	kb8_s62174
2848	kb8_rep_c2874	kb8_rep_c7012
2849	kb8_rep_c2875	kb8_rep_c41790	kb8_s53336	kb8_s60292	kb8_s68657
2851	kb8_rep_c2877	kb8_s71862
2853	kb8_rep_c2879	kb8_s64251
2855	kb8_rep_c2881	kb8_rep_c20998
2856	kb8_rep_c2883	kb8_s63867	kb8_s64519	kb8_s66521
2857	kb8_rep_c2884	kb8_s57738
2858	kb8_rep_c2885	kb8_s52968
2862	kb8_rep_c2889	kb8_s56407	kb8_s56799
2863	kb8_rep_c2890	kb8_rep_c35041	kb8_s55400	kb8_s56986	kb8_s68664	kb8_s69890
2864	kb8_rep_c2891	kb8_s52472
2865	kb8_rep_c2892	kb8_s53574	kb8_s70529
2866	kb8_rep_c2893	kb8_rep_c46966
2867	kb8_rep_c2894	kb8_rep_c29876	kb8_rep_c39387	kb8_s71072
2871	kb8_rep_c2898	kb8_rep_c31097
2874	kb8_rep_c2901	kb8_rep_c39447	kb8_s63309	kb8_s65452
2878	kb8_rep_c2905	kb8_s70785
2879	kb8_rep_c2906	kb8_rep_c53108	kb8_s54263
2880	kb8_rep_c2907	kb8_s57484
2882	kb8_rep_c2909	kb8_s55685
2883	kb8_rep_c2910	kb8_s61929
2884	kb8_rep_c2911	kb8_s54300	kb8_s64614
2886	kb8_rep_c2913	kb8_s63372
2887	kb8_rep_c2914	kb8_rep_c33755	kb8_s66069
2892	kb8_rep_c2919	kb8_s66718
2893	kb8_rep_c2920	kb8_rep_c39995
2894	kb8_rep_c2921	kb8_s71109
2895	kb8_rep_c2922	kb8_s68680
2897	kb8_rep_c2924	kb8_s69884
2903	kb8_rep_c2930	kb8_c44224	kb8_s62407
2904	kb8_rep_c2931	kb8_s53618	kb8_s61552	kb8_s68878
2905	kb8_rep_c2932	kb8_s59911
2906	kb8_rep_c2933	kb8_s60269	kb8_s63719	kb8_s65260
2907	kb8_rep_c2934	kb8_s66665
2908	kb8_rep_c2935	kb8_s54027	kb8_s66120
2912	kb8_rep_c2939	kb8_s54649
2913	kb8_rep_c2940	kb8_s68495
2915	kb8_rep_c2942	kb8_s57033
2921	kb8_rep_c2949	kb8_s56081
2925	kb8_rep_c2953	kb8_s58119
2926	kb8_rep_c2954	kb8_rep_c26274	kb8_c46655
2929	kb8_rep_c2957	kb8_rep_c41266
2931	kb8_rep_c2959	kb8_rep_c26335	kb8_s55886
2935	kb8_rep_c2963	kb8_s62090
2939	kb8_rep_c2967	kb8_s54867
2940	kb8_rep_c2968	kb8_s65928
2944	kb8_rep_c2972	kb8_s59522
2945	kb8_rep_c2973	kb8_s68347
2947	kb8_rep_c2975	kb8_rep_c24805	kb8_s52973
2949	kb8_rep_c2977	kb8_s51952	kb8_s57490
2952	kb8_rep_c2980	kb8_s57788
2955	kb8_rep_c2983	kb8_s52673
2957	kb8_rep_c2985	kb8_s54512
2958	kb8_rep_c2986	kb8_s70610
2962	kb8_rep_c2991	kb8_rep_c49168	kb8_s71018
2966	kb8_rep_c2995	kb8_rep_c19984
2970	kb8_rep_c2999	kb8_s55161
2971	kb8_rep_c3000	kb8_s63131
2974	kb8_rep_c3003	kb8_s57370
2976	kb8_rep_c3005	kb8_s68918
2978	kb8_rep_c3007	kb8_s54008
2981	kb8_rep_c3010	kb8_s52834
2982	kb8_rep_c3011	kb8_rep_c17429
2985	kb8_rep_c3014	kb8_s61511
2990	kb8_rep_c3019	kb8_s56574
2993	kb8_rep_c3022	kb8_s57255
3005	kb8_rep_c3034	kb8_s55578
3008	kb8_rep_c3037	kb8_c35261	kb8_s53801	kb8_s70594
3009	kb8_rep_c3038	kb8_rep_c31033	kb8_s54925
3010	kb8_rep_c3039	kb8_rep_c12655
3011	kb8_rep_c3040	kb8_s68182
3013	kb8_rep_c3042	kb8_rep_c30593
3015	kb8_rep_c3044	kb8_s64005
3019	kb8_rep_c3048	kb8_s53856
3020	kb8_rep_c3049	kb8_rep_c40129	kb8_s56030
3021	kb8_rep_c3050	kb8_s69528
3022	kb8_rep_c3052	kb8_s54879
3024	kb8_rep_c3054	kb8_s69056
3025	kb8_rep_c3055	kb8_c37205	kb8_rep_c41817	kb8_rep_c47365	kb8_rep_c51315	kb8_rep_c51470	kb8_rep_c52001	kb8_rep_c52191	kb8_rep_c52593	kb8_rep_c52928	kb8_rep_c53174	kb8_rep_c53934	kb8_rep_c54010	kb8_rep_c54442	kb8_rep_c55210	kb8_rep_c55247	kb8_rep_c56025	kb8_s57682	kb8_rep_c59288	kb8_s60585	kb8_rep_c61500	kb8_s62368	kb8_s63316	kb8_rep_c65443	kb8_s66904	kb8_s68338	kb8_s70334	kb8_s70335
3028	kb8_rep_c3058	kb8_s52750
3030	kb8_rep_c3060	kb8_s70426
3031	kb8_rep_c3061	kb8_s57198
3032	kb8_rep_c3062	kb8_s52715	kb8_s57329
3033	kb8_rep_c3063	kb8_s63817
3034	kb8_rep_c3064	kb8_s52016
3035	kb8_rep_c3065	kb8_s53554	kb8_s55380	kb8_s57450	kb8_s64060	kb8_s69656
3037	kb8_rep_c3067	kb8_s53477
3040	kb8_rep_c3070	kb8_s59870	kb8_s68308
3042	kb8_rep_c3072	kb8_s61841
3044	kb8_rep_c3074	kb8_c47096
3045	kb8_rep_c3075	kb8_rep_c5953	kb8_rep_c17104	kb8_rep_c20880	kb8_rep_c53153	kb8_s55779	kb8_s56254	kb8_s65468
3046	kb8_rep_c3076	kb8_rep_c25863
3047	kb8_rep_c3077	kb8_s69996
3049	kb8_rep_c3079	kb8_rep_c10930	kb8_rep_c17363	kb8_s54587	kb8_s57619
3050	kb8_rep_c3080	kb8_s54452	kb8_s64174
3052	kb8_rep_c3082	kb8_s58304
3053	kb8_rep_c3083	kb8_c47280
3054	kb8_rep_c3084	kb8_rep_c16570	kb8_rep_c36081	kb8_rep_c40296	kb8_rep_c52580	kb8_rep_c53926
3056	kb8_rep_c3086	kb8_s59071
3057	kb8_rep_c3087	kb8_s68449
3060	kb8_rep_c3090	kb8_s65565
3061	kb8_rep_c3091	kb8_s61328
3073	kb8_rep_c3103	kb8_s60580	kb8_s71633
3074	kb8_rep_c3104	kb8_s55526
3076	kb8_rep_c3106	kb8_s63108
3078	kb8_rep_c3108	kb8_s52923
3079	kb8_rep_c3109	kb8_s70605
3080	kb8_rep_c3110	kb8_s66898
3085	kb8_rep_c3115	kb8_s54413
3086	kb8_rep_c3116	kb8_s59248	kb8_s60316	kb8_s61088
3087	kb8_rep_c3117	kb8_s56220	kb8_s59559	kb8_s70806
3091	kb8_rep_c3121	kb8_s61283	kb8_s67387
3094	kb8_rep_c3124	kb8_s64043
3095	kb8_rep_c3125	kb8_s71230
3096	kb8_rep_c3126	kb8_rep_c41364
3097	kb8_rep_c3127	kb8_c37004
3098	kb8_rep_c3128	kb8_rep_c46479
3099	kb8_rep_c3129	kb8_rep_c35616
3100	kb8_rep_c3130	kb8_s60113	kb8_s60504	kb8_s65666
3101	kb8_rep_c3132	kb8_rep_c16597	kb8_rep_c52345	kb8_rep_c54202	kb8_s56924	kb8_s60604	kb8_s69207	kb8_s71325
3103	kb8_rep_c3134	kb8_s65407
3104	kb8_rep_c3135	kb8_s66779
3105	kb8_rep_c3136	kb8_s56067
3109	kb8_rep_c3140	kb8_s57957
3110	kb8_rep_c3141	kb8_s58039
3113	kb8_rep_c3144	kb8_rep_c40930
3115	kb8_rep_c3146	kb8_s62203
3116	kb8_rep_c3147	kb8_s55866	kb8_s60416
3117	kb8_rep_c3148	kb8_s63507
3118	kb8_rep_c3149	kb8_s52879	kb8_rep_c53041	kb8_rep_c54064	kb8_s61719	kb8_s63144	kb8_s64387	kb8_s68159	kb8_s68489	kb8_s71116
3119	kb8_rep_c3150	kb8_s57170	kb8_s67892
3123	kb8_rep_c3154	kb8_s62477
3124	kb8_rep_c3155	kb8_s60488	kb8_s65084
3125	kb8_rep_c3156	kb8_s54945	kb8_s64283
3127	kb8_rep_c3158	kb8_s52187	kb8_s67940
3128	kb8_rep_c3159	kb8_rep_c35267	kb8_s67373
3131	kb8_rep_c3162	kb8_rep_c38467
3133	kb8_rep_c3164	kb8_s60318
3140	kb8_rep_c3171	kb8_rep_c44050
3143	kb8_rep_c3174	kb8_s66124
3144	kb8_rep_c3175	kb8_rep_c50384
3145	kb8_rep_c3177	kb8_rep_c4792	kb8_rep_c13443	kb8_rep_c20716	kb8_rep_c45854	kb8_s53520	kb8_rep_c57183
3146	kb8_rep_c3178	kb8_s60074
3147	kb8_rep_c3179	kb8_s67910
3149	kb8_rep_c3181	kb8_s71281
3152	kb8_rep_c3184	kb8_c50835
3154	kb8_rep_c3186	kb8_s51370
3155	kb8_rep_c3187	kb8_s65984
3158	kb8_rep_c3190	kb8_s63204
3159	kb8_rep_c3191	kb8_s71161
3160	kb8_rep_c3193	kb8_rep_c36586
3161	kb8_rep_c3194	kb8_s56933	kb8_s58725	kb8_s61041
3162	kb8_rep_c3195	kb8_s69755
3167	kb8_rep_c3200	kb8_s63843	kb8_s65066
3170	kb8_rep_c3203	kb8_s70995
3172	kb8_rep_c3205	kb8_s57080	kb8_s66987
3174	kb8_rep_c3207	kb8_s66339
3177	kb8_rep_c3210	kb8_s64024
3180	kb8_rep_c3213	kb8_rep_c7108	kb8_rep_c44537
3181	kb8_rep_c3214	kb8_s66251
3190	kb8_rep_c3223	kb8_rep_c47526
3192	kb8_rep_c3225	kb8_s56236
3194	kb8_rep_c3227	kb8_s58301	kb8_s58658
3195	kb8_rep_c3228	kb8_rep_c39303	kb8_s55639	kb8_rep_c56494	kb8_s57316	kb8_s61065	kb8_rep_c64760	kb8_s71912
3197	kb8_rep_c3230	kb8_s68393
3199	kb8_rep_c3232	kb8_rep_c44700	kb8_rep_c55914	kb8_rep_c56985	kb8_s62083	kb8_s64725
3200	kb8_rep_c3233	kb8_s58833	kb8_s65756
3202	kb8_rep_c3235	kb8_rep_c20541	kb8_rep_c35207	kb8_rep_c53237	kb8_s59056	kb8_s65160
3203	kb8_rep_c3236	kb8_s68143
3204	kb8_rep_c3237	kb8_s67436
3207	kb8_rep_c3240	kb8_rep_c28778
3209	kb8_rep_c3242	kb8_s58175
3210	kb8_rep_c3243	kb8_rep_c50367
3211	kb8_rep_c3244	kb8_rep_c56531	kb8_s59169	kb8_s66148
3212	kb8_rep_c3245	kb8_rep_c8363	kb8_rep_c41070	kb8_rep_c50742
3213	kb8_rep_c3246	kb8_s52734
3221	kb8_rep_c3254	kb8_s59009
3222	kb8_rep_c3255	kb8_s52942
3224	kb8_rep_c3257	kb8_rep_c40056	kb8_s64694
3225	kb8_rep_c3258	kb8_rep_c11123	kb8_rep_c44264
3226	kb8_rep_c3259	kb8_s51792	kb8_s67553
3231	kb8_rep_c3264	kb8_s66281
3232	kb8_rep_c3265	kb8_s66787	kb8_s67050
3234	kb8_rep_c3267	kb8_rep_c28098
3236	kb8_rep_c3269	kb8_s57697
3238	kb8_rep_c3271	kb8_s67590
3239	kb8_rep_c3272	kb8_rep_c4470	kb8_rep_c52096	kb8_rep_c52283	kb8_rep_c52597	kb8_s56002	kb8_s58703	kb8_rep_c59772	kb8_s61557	kb8_rep_c64598	kb8_s68751
3240	kb8_rep_c3273	kb8_rep_c8362	kb8_rep_c17809	kb8_s54390
3244	kb8_rep_c3277	kb8_s58362
3249	kb8_c3282	kb8_s58165
3250	kb8_rep_c3283	kb8_rep_c51864
3252	kb8_rep_c3285	kb8_s56155	kb8_s63199	kb8_s65657	kb8_s68278
3256	kb8_rep_c3289	kb8_s66413
3257	kb8_rep_c3290	kb8_s52711
3258	kb8_rep_c3291	kb8_rep_c45103	kb8_s53455	kb8_s59155
3259	kb8_rep_c3292	kb8_s52966
3260	kb8_rep_c3293	kb8_s60109	kb8_s67732
3261	kb8_rep_c3294	kb8_rep_c7730	kb8_rep_c44723	kb8_s60264
3262	kb8_rep_c3295	kb8_s71129
3264	kb8_rep_c3297	kb8_rep_c44853	kb8_s69294
3266	kb8_rep_c3299	kb8_s60030
3267	kb8_rep_c3300	kb8_s51836
3270	kb8_rep_c3303	kb8_s53903
3272	kb8_rep_c3305	kb8_s69365
3275	kb8_rep_c3308	kb8_s58030
3277	kb8_rep_c3310	kb8_rep_c22577
3281	kb8_rep_c3314	kb8_s66826
3283	kb8_rep_c3316	kb8_s52525
3285	kb8_rep_c3318	kb8_s64446	kb8_s68712
3288	kb8_rep_c3321	kb8_rep_c44944
3289	kb8_rep_c3322	kb8_s61734
3292	kb8_rep_c3325	kb8_s56152	kb8_s57174
3296	kb8_rep_c3330	kb8_s55601
3299	kb8_rep_c3333	kb8_rep_c54926
3301	kb8_rep_c3335	kb8_s63194
3303	kb8_rep_c3337	kb8_s69989
3305	kb8_rep_c3339	kb8_rep_c49039
3310	kb8_rep_c3344	kb8_rep_c30211	kb8_s61726
3313	kb8_rep_c3347	kb8_rep_c41418	kb8_s54953	kb8_s62362
3314	kb8_rep_c3348	kb8_s66543
3316	kb8_rep_c3350	kb8_s62035
3319	kb8_rep_c3353	kb8_c49510
3322	kb8_rep_c3356	kb8_s55699
3323	kb8_rep_c3357	kb8_s65336
3324	kb8_rep_c3358	kb8_s59452
3326	kb8_rep_c3360	kb8_s60510	kb8_s61007
3327	kb8_rep_c3361	kb8_rep_c37815
3328	kb8_rep_c3362	kb8_s71011
3330	kb8_rep_c3364	kb8_s52979	kb8_s67178	kb8_s68365
3331	kb8_rep_c3365	kb8_s55477	kb8_s67575
3332	kb8_rep_c3366	kb8_s52063
3337	kb8_rep_c3371	kb8_s51711	kb8_s62450
3338	kb8_rep_c3372	kb8_s66259
3341	kb8_rep_c3375	kb8_s57333
3342	kb8_rep_c3376	kb8_rep_c61497
3345	kb8_rep_c3379	kb8_rep_c48708	kb8_s65583
3349	kb8_rep_c3383	kb8_c44943
3353	kb8_rep_c3387	kb8_s58123
3356	kb8_rep_c3390	kb8_s57672	kb8_s59024
3357	kb8_rep_c3391	kb8_s63648
3360	kb8_rep_c3394	kb8_s69968
3362	kb8_rep_c3396	kb8_rep_c44010
3363	kb8_rep_c3397	kb8_rep_c40917
3370	kb8_rep_c3404	kb8_rep_c18566
3372	kb8_rep_c3406	kb8_s66118
3373	kb8_rep_c3407	kb8_s61317
3376	kb8_rep_c3410	kb8_s63458
3377	kb8_rep_c3411	kb8_rep_c36092
3379	kb8_rep_c3413	kb8_c44469
3380	kb8_rep_c3414	kb8_s55326
3384	kb8_rep_c3418	kb8_s56472	kb8_s62377
3385	kb8_rep_c3419	kb8_s54210
3388	kb8_rep_c3422	kb8_rep_c45534	kb8_s67803
3391	kb8_rep_c3425	kb8_rep_c15064	kb8_rep_c34582	kb8_rep_c43053	kb8_s58920	kb8_s64816	kb8_s68109	kb8_s71152
3392	kb8_rep_c3426	kb8_s66952	kb8_s72113
3393	kb8_rep_c3427	kb8_s70868
3395	kb8_rep_c3429	kb8_s69200
3396	kb8_rep_c3430	kb8_rep_c44370	kb8_s66207
3399	kb8_rep_c3433	kb8_rep_c21696	kb8_s62569
3400	kb8_rep_c3434	kb8_s71015
3401	kb8_rep_c3435	kb8_c48220	kb8_s61029
3403	kb8_rep_c3437	kb8_s62824	kb8_s65637
3404	kb8_rep_c3438	kb8_rep_c52385
3405	kb8_rep_c3439	kb8_rep_c50869	kb8_rep_c52560	kb8_rep_c53220
3406	kb8_rep_c3440	kb8_s58015
3407	kb8_rep_c3441	kb8_s51244
3408	kb8_rep_c3442	kb8_s56485
3409	kb8_rep_c3443	kb8_rep_c30067
3412	kb8_rep_c3446	kb8_s71708
3413	kb8_rep_c3447	kb8_s70877
3416	kb8_rep_c3450	kb8_rep_c20192	kb8_rep_c55213	kb8_rep_c55598	kb8_s56983	kb8_s61736
3417	kb8_rep_c3451	kb8_s56179	kb8_s63011
3420	kb8_rep_c3454	kb8_s70626
3423	kb8_rep_c3457	kb8_c26730	kb8_s61968	kb8_s67452
3424	kb8_rep_c3458	kb8_s60838
3427	kb8_rep_c3461	kb8_s67648
3428	kb8_rep_c3462	kb8_s66371
3429	kb8_rep_c3463	kb8_rep_c40591
3430	kb8_rep_c3464	kb8_s62749
3431	kb8_rep_c3465	kb8_rep_c32626	kb8_s54320
3434	kb8_rep_c3468	kb8_rep_c9599	kb8_rep_c18857	kb8_rep_c53733	kb8_rep_c55248
3438	kb8_rep_c3473	kb8_rep_c20068
3440	kb8_rep_c3475	kb8_c18806	kb8_s55302	kb8_s68240
3441	kb8_rep_c3476	kb8_s54927	kb8_rep_c56193	kb8_s66308
3444	kb8_rep_c3479	kb8_rep_c41791
3445	kb8_rep_c3480	kb8_s54872
3447	kb8_rep_c3482	kb8_s60451
3449	kb8_rep_c3484	kb8_s62757
3450	kb8_rep_c3485	kb8_s60253
3459	kb8_rep_c3494	kb8_s51867
3460	kb8_rep_c3495	kb8_rep_c39773
3461	kb8_rep_c3496	kb8_rep_c42660
3462	kb8_rep_c3497	kb8_s61173
3465	kb8_rep_c3500	kb8_rep_c33149
3467	kb8_rep_c3502	kb8_rep_c28988
3468	kb8_rep_c3503	kb8_s55167
3469	kb8_rep_c3504	kb8_rep_c43277
3473	kb8_rep_c3508	kb8_s64703
3474	kb8_rep_c3509	kb8_s60783	kb8_s64339	kb8_s68286
3475	kb8_rep_c3510	kb8_rep_c40875
3476	kb8_rep_c3511	kb8_s61167
3477	kb8_rep_c3512	kb8_s68095
3479	kb8_rep_c3514	kb8_s53217
3480	kb8_rep_c3515	kb8_s69904
3483	kb8_rep_c3518	kb8_s59493	kb8_s69275
3487	kb8_rep_c3522	kb8_s58840
3488	kb8_rep_c3523	kb8_s68426
3491	kb8_rep_c3526	kb8_rep_c43260	kb8_s51855	kb8_rep_c54045	kb8_s63347	kb8_s65772	kb8_s66766
3492	kb8_rep_c3527	kb8_rep_c10766	kb8_s62216	kb8_s70920
3493	kb8_rep_c3528	kb8_s68777	kb8_s70586
3497	kb8_rep_c3532	kb8_s52713	kb8_s59658
3498	kb8_rep_c3533	kb8_s69478
3499	kb8_rep_c3534	kb8_rep_c46203	kb8_s64108
3501	kb8_rep_c3536	kb8_rep_c54165
3503	kb8_rep_c3538	kb8_rep_c37692
3505	kb8_rep_c3540	kb8_rep_c28766	kb8_rep_c51741	kb8_s51945	kb8_rep_c53704	kb8_s61745
3506	kb8_rep_c3541	kb8_s52133	kb8_s70975
3509	kb8_rep_c3544	kb8_s61643
[truncated: 6,483 more rows]
[truncated: 127 more columns]

## Sheet: Mf1.05b
0	mf105_rep_c1	mf105_rep_c17817	mf105_rep_c32781	mf105_s52771	mf105_rep_c54090	mf105_s67600
2	mf105_rep_c3	mf105_rep_c14542	mf105_rep_c16331	mf105_s38470	mf105_s58172	mf105_s60548	mf105_s67439	mf105_s70381	mf105_s75096	mf105_s75793
3	mf105_rep_c4	mf105_rep_c42845	mf105_rep_c45053	mf105_c47544	mf105_s58360	mf105_s64291	mf105_s68179
4	mf105_rep_c5	mf105_s66782
5	mf105_rep_c6	mf105_rep_c35267	mf105_rep_c36103	mf105_rep_c45161	mf105_s62443	mf105_s66693	mf105_s68939
6	mf105_rep_c7	mf105_rep_c8086	mf105_rep_c34538	mf105_rep_c41899	mf105_s69018
7	mf105_rep_c8	mf105_rep_c42619	mf105_s54989	mf105_s68143
8	mf105_rep_c9	mf105_s52203	mf105_s54092	mf105_s56255
9	mf105_rep_c10	mf105_rep_c23570	mf105_rep_c29403	mf105_rep_c44313	mf105_s54262
10	mf105_rep_c11	mf105_rep_c3246	mf105_rep_c14314	mf105_s51266	mf105_s52431	mf105_rep_c57658	mf105_s60367
11	mf105_rep_c12	mf105_rep_c22210	mf105_s63047
12	mf105_rep_c13	mf105_s57925
13	mf105_rep_c14	mf105_rep_c9543	mf105_rep_c23358	mf105_rep_c29588	mf105_s54106	mf105_s63838	mf105_s64011	mf105_s65985	mf105_s66312	mf105_s67090	mf105_s74822
14	mf105_rep_c15	mf105_rep_c13570	mf105_s67461
15	mf105_rep_c16	mf105_rep_c19656	mf105_s58930	mf105_s67999	mf105_s75924
16	mf105_rep_c17	mf105_rep_c26348	mf105_s50855	mf105_s68507
17	mf105_rep_c18	mf105_rep_c6775	mf105_rep_c45193	mf105_s49809
18	mf105_rep_c19	mf105_rep_c11197	mf105_rep_c17085	mf105_rep_c17970	mf105_c27237	mf105_rep_c30177	mf105_rep_c39955	mf105_rep_c42701	mf105_s48536	mf105_s48599	mf105_c50638	mf105_s52404	mf105_s57056	mf105_s57775	mf105_s60185	mf105_s65324	mf105_s66863	mf105_s68306	mf105_s69567	mf105_s71960	mf105_s72723	mf105_s72775	mf105_s74516
19	mf105_rep_c20	mf105_rep_c24024	mf105_rep_c30373	mf105_s60458	mf105_s71257
20	mf105_rep_c21	mf105_rep_c47845	mf105_s60492	mf105_s62298	mf105_s70921	mf105_s74908
21	mf105_rep_c22	mf105_rep_c9765	mf105_rep_c37618	mf105_rep_c44409	mf105_rep_c49773	mf105_s54748	mf105_s55511	mf105_s64681
22	mf105_rep_c23	mf105_s53014	mf105_s54404	mf105_s57486	mf105_s64767	mf105_s68355
23	mf105_rep_c24	mf105_rep_c16958	mf105_rep_c23631	mf105_rep_c29312	mf105_rep_c40466	mf105_s49953	mf105_s64558	mf105_s66005
24	mf105_rep_c25	mf105_rep_c38000	mf105_s61549	mf105_s66623	mf105_s74481
25	mf105_rep_c26	mf105_s67335	mf105_s71297
26	mf105_rep_c27	mf105_rep_c44127	mf105_s67288
27	mf105_rep_c28	mf105_rep_c28200	mf105_rep_c40289	mf105_s53108
28	mf105_rep_c29	mf105_s42401	mf105_rep_c44587	mf105_s67959
29	mf105_rep_c30	mf105_s63963
30	mf105_rep_c31	mf105_rep_c18218	mf105_rep_c31696	mf105_rep_c47939	mf105_s49269	mf105_s64138	mf105_s64841
31	mf105_rep_c32	mf105_rep_c26941	mf105_s58921	mf105_s62035
32	mf105_rep_c33	mf105_rep_c13329	mf105_rep_c44698	mf105_s53622	mf105_s69742
33	mf105_rep_c34	mf105_s53545	mf105_s57792	mf105_s67523
34	mf105_rep_c35	mf105_rep_c21422	mf105_rep_c30367	mf105_rep_c39381	mf105_s54953	mf105_s55143	mf105_s58120	mf105_s70555
35	mf105_rep_c36	mf105_rep_c34106	mf105_s71262	mf105_s75737
37	mf105_rep_c38	mf105_rep_c26203	mf105_rep_c32501	mf105_s55393
38	mf105_rep_c39	mf105_rep_c14875	mf105_rep_c48702	mf105_s61806	mf105_s66071
39	mf105_rep_c40	mf105_s56035	mf105_s57455	mf105_s70925	mf105_s71709
40	mf105_rep_c41	mf105_rep_c6184	mf105_rep_c26307	mf105_rep_c40659	mf105_s50216	mf105_s54566	mf105_s58150	mf105_s66141	mf105_s67070	mf105_s70816	mf105_s71788
41	mf105_rep_c42	mf105_rep_c20524	mf105_rep_c38510	mf105_s52124	mf105_s64140	mf105_s68980	mf105_s72282
42	mf105_rep_c43	mf105_rep_c42875	mf105_s64748
43	mf105_rep_c44	mf105_rep_c45035
45	mf105_rep_c46	mf105_rep_c27423	mf105_s57769	mf105_s65146	mf105_s73329	mf105_s76277
46	mf105_rep_c47	mf105_s50623	mf105_s59876	mf105_s65862	mf105_s74759
47	mf105_rep_c48	mf105_rep_c37003	mf105_s65102
48	mf105_rep_c49	mf105_rep_c28525	mf105_c48141	mf105_s52358	mf105_s52562
49	mf105_rep_c50	mf105_s50562	mf105_s51222	mf105_s56311
50	mf105_rep_c51	mf105_s58693	mf105_s64573	mf105_s64618
51	mf105_rep_c52	mf105_rep_c22510	mf105_rep_c28444	mf105_rep_c32177	mf105_rep_c41158	mf105_s48576	mf105_rep_c52510	mf105_s56539	mf105_s57399	mf105_s59345	mf105_s59575	mf105_s63438	mf105_s63592	mf105_s66390	mf105_s67757	mf105_s68748	mf105_s70148	mf105_s71352
52	mf105_rep_c53	mf105_s48378	mf105_s65822
53	mf105_rep_c54	mf105_s51609	mf105_s51737	mf105_s53800
54	mf105_rep_c55	mf105_s57225	mf105_s66999	mf105_s67018
55	mf105_rep_c56	mf105_rep_c20369	mf105_rep_c50035	mf105_s72614
56	mf105_rep_c57	mf105_rep_c27850	mf105_rep_c36330	mf105_s60292	mf105_s67629
57	mf105_rep_c58	mf105_s52999	mf105_s60153	mf105_s74390
58	mf105_rep_c59	mf105_s48294	mf105_s52109	mf105_s56710	mf105_s60298
59	mf105_rep_c60	mf105_rep_c24306	mf105_s52937	mf105_s62572
60	mf105_rep_c61	mf105_rep_c12695	mf105_s50143
61	mf105_rep_c62	mf105_rep_c9558	mf105_rep_c25069	mf105_rep_c31088	mf105_rep_c32331	mf105_s51465	mf105_s54809	mf105_s58453	mf105_s66249	mf105_s67240	mf105_s68925	mf105_s74479
63	mf105_rep_c64	mf105_s53635	mf105_s53844	mf105_s64946
64	mf105_rep_c65	mf105_s70480	mf105_s71851
65	mf105_rep_c66	mf105_rep_c20610	mf105_s44840	mf105_s56754	mf105_s72677
66	mf105_rep_c67	mf105_rep_c46045
67	mf105_rep_c68	mf105_rep_c36093	mf105_s73219	mf105_s75865
69	mf105_rep_c70	mf105_rep_c44548	mf105_s61076
70	mf105_rep_c71	mf105_rep_c23152	mf105_rep_c36594
71	mf105_rep_c72	mf105_rep_c25952	mf105_s50427	mf105_s54395	mf105_s55518	mf105_s57441	mf105_s60327	mf105_s61343	mf105_s69261	mf105_s69817	mf105_s73514	mf105_s74709
72	mf105_rep_c73	mf105_rep_c35731	mf105_s63659
73	mf105_rep_c74	mf105_rep_c43318	mf105_rep_c47112	mf105_s49740	mf105_s51010	mf105_s51979
74	mf105_rep_c75	mf105_rep_c30494	mf105_s53696	mf105_s61729
75	mf105_rep_c76	mf105_rep_c44374
76	mf105_rep_c77	mf105_rep_c46280	mf105_s70719
77	mf105_rep_c78	mf105_rep_c28371	mf105_rep_c39549	mf105_s59566	mf105_s64591	mf105_s66111	mf105_s74075	mf105_s75351
78	mf105_rep_c79	mf105_s59578
79	mf105_rep_c80	mf105_rep_c18935	mf105_s53963	mf105_s66664	mf105_s71657
80	mf105_rep_c81	mf105_rep_c47221	mf105_s54864	mf105_s76174
81	mf105_rep_c82	mf105_s54581
82	mf105_rep_c83	mf105_rep_c28313	mf105_rep_c42217	mf105_s48786	mf105_s72880
83	mf105_rep_c84	mf105_rep_c58230
84	mf105_rep_c85	mf105_rep_c39151	mf105_s51650
85	mf105_rep_c86	mf105_rep_c27790	mf105_rep_c29101	mf105_rep_c45142	mf105_s55210	mf105_s57854	mf105_s63993	mf105_s71279
86	mf105_rep_c87	mf105_rep_c16968	mf105_s55534	mf105_s58775	mf105_s65143	mf105_s72093	mf105_s74925
87	mf105_rep_c88	mf105_rep_c6006	mf105_s53916	mf105_s75735	mf105_s76102
88	mf105_rep_c89	mf105_rep_c17217	mf105_rep_c39369	mf105_s58283	mf105_s59559	mf105_s71737	mf105_s72152
89	mf105_rep_c90	mf105_s56350	mf105_s59895	mf105_s68513	mf105_s71790
90	mf105_rep_c91	mf105_rep_c37933	mf105_s64898	mf105_s69012
91	mf105_rep_c92	mf105_rep_c51875	mf105_s55621
92	mf105_rep_c93	mf105_rep_c32221	mf105_s53085	mf105_s73168
93	mf105_rep_c94	mf105_s68277
94	mf105_rep_c95	mf105_rep_c11916	mf105_rep_c20021	mf105_rep_c49139	mf105_s62213
95	mf105_rep_c96	mf105_rep_c31935
96	mf105_rep_c97	mf105_rep_c18547	mf105_rep_c25611	mf105_s55763	mf105_s66231
97	mf105_rep_c98	mf105_rep_c37723	mf105_s49944
98	mf105_rep_c99	mf105_s57175
99	mf105_rep_c100	mf105_rep_c39666	mf105_rep_c46398	mf105_s65844	mf105_s71290	mf105_s71480	mf105_s73795	mf105_s76007
100	mf105_rep_c101	mf105_s53529	mf105_s75488
101	mf105_rep_c102	mf105_s53344	mf105_s57380
102	mf105_rep_c103	mf105_rep_c26145	mf105_s64800
103	mf105_rep_c104	mf105_s72650	mf105_s73462
104	mf105_rep_c105	mf105_s53226	mf105_s54052	mf105_s54892	mf105_s65165	mf105_s71648	mf105_s75268
105	mf105_rep_c106	mf105_s66519	mf105_s67566	mf105_s74851
106	mf105_rep_c107	mf105_s52032	mf105_s54122
107	mf105_rep_c108	mf105_rep_c11740	mf105_s58674	mf105_s68758
108	mf105_rep_c109	mf105_rep_c13623
109	mf105_rep_c110	mf105_rep_c32036
110	mf105_rep_c111	mf105_s25686	mf105_rep_c26177	mf105_rep_c40880	mf105_rep_c42063	mf105_rep_c48051	mf105_s48565	mf105_s69091	mf105_s70665
111	mf105_rep_c112	mf105_s56413	mf105_s64868	mf105_s68315
112	mf105_rep_c113	mf105_s67443	mf105_s68439
113	mf105_rep_c114	mf105_rep_c33871	mf105_s55480
114	mf105_rep_c115	mf105_s68554
115	mf105_rep_c116	mf105_rep_c47707	mf105_s56301	mf105_s67111
116	mf105_rep_c117	mf105_rep_c39933
117	mf105_rep_c118	mf105_rep_c14073	mf105_rep_c46270	mf105_s66668	mf105_s76250
118	mf105_rep_c119	mf105_rep_c38532	mf105_rep_c39719	mf105_rep_c43477	mf105_s64878	mf105_s71452
119	mf105_rep_c120	mf105_rep_c34338
120	mf105_rep_c121	mf105_s66056	mf105_s74480
121	mf105_rep_c122	mf105_rep_c1850	mf105_s50289	mf105_s52145	mf105_s73436	mf105_s76013
122	mf105_rep_c123	mf105_s58256	mf105_s66834	mf105_s68170	mf105_s70034
123	mf105_rep_c124	mf105_s32275	mf105_s56127	mf105_s66516	mf105_s72032	mf105_s74687
124	mf105_rep_c125	mf105_rep_c30882	mf105_rep_c37009	mf105_s51981	mf105_s65019	mf105_s76245
125	mf105_rep_c126	mf105_rep_c43798	mf105_s66144	mf105_s71224
126	mf105_rep_c127	mf105_rep_c34101	mf105_s51942	mf105_s54619	mf105_s57041	mf105_s58124	mf105_s58209	mf105_s58934
127	mf105_rep_c128	mf105_s54876
128	mf105_rep_c129	mf105_rep_c39866	mf105_rep_c41793	mf105_s54240	mf105_s75490
129	mf105_rep_c130	mf105_s56122	mf105_s69154
131	mf105_rep_c132	mf105_rep_c44136	mf105_s67737
132	mf105_rep_c133	mf105_rep_c17121
133	mf105_rep_c134	mf105_rep_c30483	mf105_s52129	mf105_s65735	mf105_s69392	mf105_s76202
134	mf105_rep_c135	mf105_rep_c18051	mf105_s75807
135	mf105_rep_c136	mf105_s52516	mf105_s54282	mf105_s59838
136	mf105_rep_c137	mf105_s73775
137	mf105_rep_c138	mf105_s52417	mf105_s76079
138	mf105_rep_c139	mf105_rep_c31739	mf105_s67395	mf105_s70818	mf105_s74690
139	mf105_rep_c140	mf105_s59447	mf105_s66160
140	mf105_rep_c141	mf105_s63336	mf105_s75330
141	mf105_rep_c142	mf105_rep_c44664	mf105_s58796	mf105_s62467	mf105_s62807	mf105_s69514
142	mf105_rep_c143	mf105_rep_c45428	mf105_s51192	mf105_s71356
143	mf105_rep_c144	mf105_rep_c35152	mf105_rep_c37523	mf105_s59081
144	mf105_rep_c145	mf105_rep_c33542	mf105_rep_c44646	mf105_s56063	mf105_s60503	mf105_s62543	mf105_s68431	mf105_s68993	mf105_s69474	mf105_s76189
145	mf105_rep_c146	mf105_rep_c5416	mf105_rep_c47177	mf105_s66095
146	mf105_rep_c147	mf105_s75655
147	mf105_rep_c148	mf105_rep_c32715	mf105_rep_c60075	mf105_s60315	mf105_s61163	mf105_s71703	mf105_s74442
148	mf105_rep_c149	mf105_s57773
149	mf105_rep_c150	mf105_s73053
150	mf105_rep_c151	mf105_rep_c42056	mf105_s73675
151	mf105_rep_c152	mf105_s51239	mf105_s62454	mf105_s62565	mf105_s76152
152	mf105_rep_c153	mf105_rep_c30413	mf105_s65786	mf105_s71377	mf105_s73830
153	mf105_rep_c154	mf105_rep_c21065	mf105_rep_c26112	mf105_rep_c42157	mf105_rep_c42704	mf105_s50946	mf105_s57029	mf105_s64799
154	mf105_rep_c155	mf105_rep_c37797	mf105_s57807	mf105_s65170	mf105_s71060
155	mf105_rep_c156	mf105_rep_c32261	mf105_s72211	mf105_s74546
157	mf105_rep_c158	mf105_rep_c32295	mf105_s57037
158	mf105_rep_c159	mf105_rep_c5241	mf105_rep_c31795	mf105_rep_c42993	mf105_s72920
160	mf105_rep_c161	mf105_rep_c30869	mf105_s62729	mf105_s62791	mf105_s62902	mf105_s75023
161	mf105_rep_c162	mf105_rep_c11549	mf105_rep_c13545	mf105_s54537
162	mf105_rep_c163	mf105_rep_c47096	mf105_s52058	mf105_s75154
163	mf105_rep_c164	mf105_rep_c41400	mf105_s54153	mf105_s58807
165	mf105_rep_c166	mf105_rep_c19344	mf105_rep_c31852	mf105_s54321	mf105_s58193	mf105_s71603
166	mf105_rep_c167	mf105_rep_c23190	mf105_rep_c37065	mf105_s71208	mf105_s73415
167	mf105_rep_c168	mf105_rep_c45401	mf105_s54657	mf105_s66581
168	mf105_rep_c169	mf105_rep_c11051	mf105_rep_c35625	mf105_s58339	mf105_s72023	mf105_s74129
169	mf105_rep_c170	mf105_rep_c25364	mf105_rep_c39362
170	mf105_rep_c171	mf105_s63608	mf105_s64503
171	mf105_rep_c172	mf105_s58556	mf105_s59417	mf105_s63861	mf105_s67692	mf105_s75946
172	mf105_rep_c173	mf105_rep_c43464	mf105_s71009
173	mf105_rep_c174	mf105_rep_c44022	mf105_s55529
174	mf105_rep_c175	mf105_rep_c44045
175	mf105_rep_c176	mf105_s59676
176	mf105_rep_c177	mf105_rep_c43296	mf105_s69074
177	mf105_rep_c178	mf105_rep_c17519	mf105_rep_c20970	mf105_s73024
178	mf105_rep_c179	mf105_rep_c49159
179	mf105_rep_c180	mf105_rep_c49122
180	mf105_rep_c181	mf105_rep_c39091
181	mf105_rep_c182	mf105_s64374	mf105_s73130	mf105_s73231
182	mf105_rep_c183	mf105_rep_c31181	mf105_s57816	mf105_s58087
183	mf105_rep_c184	mf105_rep_c29642	mf105_s64373	mf105_s67987	mf105_s70141
184	mf105_rep_c185	mf105_rep_c29697
185	mf105_rep_c186	mf105_rep_c31657	mf105_rep_c38400	mf105_s72846
186	mf105_rep_c187	mf105_rep_c20909	mf105_rep_c28615	mf105_s52223	mf105_s67278	mf105_s75214
187	mf105_rep_c188	mf105_rep_c2843	mf105_rep_c35182	mf105_s44611	mf105_rep_c45137	mf105_s50787	mf105_s51318	mf105_s53221	mf105_s53842	mf105_s58654	mf105_s59066
188	mf105_rep_c189	mf105_rep_c7993	mf105_rep_c17713	mf105_s49592	mf105_s53603	mf105_s62822
189	mf105_rep_c190	mf105_rep_c33588	mf105_s73517	mf105_s75928
190	mf105_rep_c191	mf105_rep_c32187	mf105_rep_c47425	mf105_s55402	mf105_s65491
191	mf105_rep_c192	mf105_s59793
192	mf105_rep_c193	mf105_rep_c22871	mf105_rep_c29967	mf105_c46747	mf105_s57048
193	mf105_rep_c194	mf105_s52624
194	mf105_rep_c195	mf105_rep_c31578	mf105_s53557	mf105_s66745
195	mf105_rep_c196	mf105_rep_c27791
196	mf105_rep_c197	mf105_rep_c22284	mf105_s74080
197	mf105_rep_c198	mf105_s58110
198	mf105_rep_c199	mf105_rep_c48048	mf105_s59071
199	mf105_rep_c200	mf105_rep_c27072	mf105_rep_c38392	mf105_s73192
200	mf105_rep_c201	mf105_s63532	mf105_s73897
201	mf105_rep_c202	mf105_s67669
202	mf105_rep_c203	mf105_s56353
203	mf105_rep_c204	mf105_rep_c43303	mf105_s65906
204	mf105_rep_c205	mf105_rep_c42155	mf105_s51706	mf105_s56427	mf105_s60268
205	mf105_rep_c206	mf105_rep_c43106	mf105_s50547
206	mf105_rep_c207	mf105_s52217	mf105_s70421
207	mf105_rep_c208	mf105_rep_c28153	mf105_s43770	mf105_s56004	mf105_s58334
208	mf105_rep_c209	mf105_s55408	mf105_s55940	mf105_s62728
210	mf105_rep_c211	mf105_rep_c7287	mf105_rep_c36989	mf105_s65133	mf105_s67516
211	mf105_rep_c212	mf105_rep_c29598	mf105_s60986	mf105_s62931	mf105_s74172	mf105_s74862
212	mf105_rep_c213	mf105_rep_c45545
214	mf105_rep_c215	mf105_rep_c24141	mf105_s52346	mf105_s67128
215	mf105_rep_c216	mf105_rep_c24296	mf105_rep_c28831	mf105_rep_c49342	mf105_s50224	mf105_s54104
216	mf105_rep_c217	mf105_rep_c41304	mf105_s48717	mf105_s52534
217	mf105_rep_c218	mf105_rep_c14341	mf105_rep_c17000	mf105_rep_c19176	mf105_rep_c20084	mf105_rep_c34058	mf105_rep_c40892	mf105_s50149	mf105_s52955	mf105_s53550	mf105_s54880	mf105_s59757	mf105_s62107	mf105_s63192	mf105_s66947	mf105_s69947	mf105_s74036
218	mf105_rep_c219	mf105_s64690	mf105_s66208
219	mf105_rep_c220	mf105_rep_c17808	mf105_rep_c42696	mf105_s73286
220	mf105_rep_c221	mf105_rep_c28114	mf105_s72950
221	mf105_rep_c222	mf105_rep_c33156	mf105_rep_c41412	mf105_s62021	mf105_s66496	mf105_s68421
222	mf105_rep_c223	mf105_s66909
223	mf105_rep_c224	mf105_rep_c42390	mf105_rep_c45257	mf105_s53769	mf105_s70055
224	mf105_rep_c225	mf105_rep_c27751	mf105_rep_c47289	mf105_s74604
225	mf105_rep_c226	mf105_rep_c35017	mf105_s51842	mf105_s60698	mf105_s62982	mf105_s74919	mf105_s75776
226	mf105_rep_c227	mf105_s57916	mf105_s64398
227	mf105_rep_c228	mf105_s56198
228	mf105_rep_c229	mf105_rep_c34320	mf105_s53089	mf105_s60856	mf105_s63186
229	mf105_rep_c230	mf105_rep_c24670	mf105_s49701
230	mf105_rep_c231	mf105_s62016	mf105_s64279
231	mf105_rep_c232	mf105_rep_c25942	mf105_s67705	mf105_s72968
232	mf105_rep_c233	mf105_rep_c42276	mf105_s52462	mf105_s52822	mf105_s60593	mf105_s72431
233	mf105_rep_c234	mf105_s58655	mf105_s59744
234	mf105_rep_c235	mf105_rep_c24312
235	mf105_rep_c236	mf105_rep_c30411	mf105_s53153	mf105_s58809	mf105_s60199	mf105_s64220	mf105_s69667
236	mf105_rep_c237	mf105_rep_c13136	mf105_rep_c37872	mf105_s71624	mf105_s72064
237	mf105_rep_c238	mf105_s61835
238	mf105_rep_c239	mf105_rep_c34282	mf105_s59597	mf105_s62943	mf105_s73752
239	mf105_rep_c240	mf105_s61135	mf105_s72765
240	mf105_rep_c241	mf105_rep_c20982	mf105_rep_c32073	mf105_rep_c46904	mf105_s48744	mf105_s58373
241	mf105_rep_c242	mf105_rep_c43625	mf105_s69734
242	mf105_rep_c243	mf105_s51540
243	mf105_rep_c244	mf105_rep_c35835	mf105_s53016
244	mf105_rep_c245	mf105_rep_c42559	mf105_c44655	mf105_rep_c45523	mf105_rep_c46199	mf105_rep_c47057	mf105_c47324	mf105_rep_c47521	mf105_c47571	mf105_rep_c48269	mf105_s48284	mf105_s48315	mf105_rep_c48391	mf105_s48590	mf105_s55246	mf105_s56393	mf105_c60351	mf105_s60468	mf105_s62201	mf105_s69097	mf105_s71533	mf105_s71933	mf105_s72552	mf105_s73101
245	mf105_rep_c246	mf105_s70230	mf105_s73609
246	mf105_rep_c247	mf105_rep_c40697	mf105_s42238	mf105_s52316	mf105_s53199	mf105_s72073
247	mf105_rep_c248	mf105_s63513	mf105_s69070
248	mf105_rep_c249	mf105_rep_c31017	mf105_s48662	mf105_s73114
249	mf105_rep_c250	mf105_s61306
250	mf105_rep_c251	mf105_rep_c23968	mf105_s55247	mf105_s67085
251	mf105_rep_c252	mf105_rep_c15896	mf105_s50082	mf105_s51578	mf105_s51908	mf105_s74173
252	mf105_rep_c253	mf105_rep_c29263	mf105_s52084	mf105_s60848	mf105_s70834
253	mf105_rep_c254	mf105_rep_c41625	mf105_s51754	mf105_s62645
254	mf105_rep_c255	mf105_s49130	mf105_s56077	mf105_s66882	mf105_s72591
255	mf105_rep_c256	mf105_c40592	mf105_s75019
256	mf105_rep_c257	mf105_rep_c17545	mf105_rep_c45726	mf105_s71633	mf105_s75003
257	mf105_rep_c258	mf105_rep_c47098	mf105_s49212	mf105_s66512
258	mf105_rep_c259	mf105_rep_c19086	mf105_rep_c21264	mf105_c37907	mf105_rep_c46050	mf105_s48510	mf105_s48916	mf105_s49119	mf105_s50334	mf105_s53596	mf105_s56102	mf105_s56621	mf105_s57520	mf105_s58899	mf105_s60915	mf105_s62948	mf105_s65352	mf105_s71384
260	mf105_rep_c261	mf105_s51575	mf105_s52400	mf105_s60994
261	mf105_rep_c262	mf105_s55216	mf105_s71108
262	mf105_rep_c263	mf105_c40995	mf105_s68930	mf105_s73707
263	mf105_rep_c264	mf105_rep_c43481	mf105_s44688	mf105_s65340
264	mf105_rep_c265	mf105_rep_c47442	mf105_s48552	mf105_s54812	mf105_s70638	mf105_s72385
265	mf105_rep_c266	mf105_rep_c25082	mf105_rep_c29000	mf105_s67880
266	mf105_rep_c267	mf105_rep_c22491	mf105_rep_c29839	mf105_s65436	mf105_s75170
267	mf105_rep_c268	mf105_rep_c47470	mf105_s54867	mf105_s64939
268	mf105_rep_c269	mf105_s53101	mf105_s55013	mf105_s58205	mf105_s68395
269	mf105_rep_c270	mf105_s58416	mf105_s73621
271	mf105_rep_c272	mf105_s75931
272	mf105_rep_c273	mf105_s63388
273	mf105_rep_c274	mf105_rep_c22135	mf105_rep_c31426
274	mf105_rep_c275	mf105_rep_c23401	mf105_rep_c45648
275	mf105_rep_c276	mf105_rep_c43983	mf105_s55203	mf105_s55261	mf105_s71733
276	mf105_rep_c277	mf105_rep_c30975	mf105_s49534	mf105_s62099
277	mf105_rep_c278	mf105_s54942	mf105_s58254
279	mf105_rep_c280	mf105_s75049
280	mf105_rep_c281	mf105_rep_c30956	mf105_s65874
281	mf105_rep_c282	mf105_rep_c35863	mf105_s57748	mf105_s59513	mf105_s69761
282	mf105_rep_c283	mf105_rep_c31683	mf105_s49174	mf105_s58216	mf105_s63685
283	mf105_rep_c284	mf105_rep_c43590	mf105_s51639
284	mf105_rep_c285	mf105_s56657	mf105_s66049
286	mf105_rep_c287	mf105_s64607
287	mf105_rep_c288	mf105_rep_c19058	mf105_rep_c41655	mf105_rep_c49236	mf105_s65420
288	mf105_rep_c289	mf105_s71469
289	mf105_rep_c290	mf105_s54722	mf105_s58481	mf105_s59045	mf105_s64577
290	mf105_rep_c291	mf105_rep_c46061	mf105_s56484	mf105_s60186	mf105_s71599
291	mf105_rep_c292	mf105_rep_c32358	mf105_s62604	mf105_s65233
292	mf105_rep_c293	mf105_s64217
293	mf105_rep_c294	mf105_rep_c19775
294	mf105_rep_c295	mf105_s72257
295	mf105_rep_c296	mf105_s61763	mf105_s73388
296	mf105_rep_c297	mf105_s70655	mf105_s71816
297	mf105_rep_c298	mf105_s53896	mf105_s55522	mf105_s58814	mf105_s61192
298	mf105_rep_c299	mf105_s69352
300	mf105_rep_c301	mf105_rep_c41735	mf105_s53054	mf105_s54162	mf105_s65800	mf105_s65812
301	mf105_rep_c302	mf105_rep_c11921	mf105_s66381
302	mf105_rep_c303	mf105_rep_c45360	mf105_s53947	mf105_s66024	mf105_s70182	mf105_s70337
303	mf105_rep_c304	mf105_rep_c26138	mf105_s60922	mf105_s65174	mf105_s72484
304	mf105_rep_c305	mf105_s52724	mf105_s59451	mf105_s65086	mf105_s66981	mf105_s75286
305	mf105_rep_c306	mf105_rep_c19909	mf105_s57370
307	mf105_rep_c308	mf105_s63467	mf105_s63856	mf105_s69288
308	mf105_rep_c309	mf105_rep_c24532	mf105_s64341	mf105_s73348
309	mf105_rep_c310	mf105_rep_c43592
310	mf105_rep_c311	mf105_rep_c25565	mf105_rep_c29207	mf105_rep_c30116	mf105_rep_c42168	mf105_s52010	mf105_s56300	mf105_s57976	mf105_s60847
312	mf105_rep_c313	mf105_rep_c36333	mf105_s59070	mf105_s62854	mf105_s69635
313	mf105_rep_c314	mf105_s56330	mf105_s63783	mf105_s70249
314	mf105_rep_c315	mf105_rep_c21301	mf105_rep_c34799
315	mf105_rep_c316	mf105_rep_c47020	mf105_s52341	mf105_s67062
316	mf105_rep_c317	mf105_rep_c52192	mf105_rep_c53890	mf105_s55025	mf105_s58383
317	mf105_rep_c318	mf105_rep_c30711
318	mf105_rep_c319	mf105_rep_c18304	mf105_rep_c41171	mf105_s59022	mf105_s61430	mf105_s61581	mf105_s70356
319	mf105_rep_c320	mf105_rep_c31243	mf105_rep_c45030	mf105_s57831	mf105_s62136	mf105_s71083
320	mf105_rep_c321	mf105_rep_c6416	mf105_rep_c47768	mf105_rep_c51817
321	mf105_rep_c322	mf105_s56219	mf105_s57964	mf105_s63854	mf105_s69856	mf105_s73934
322	mf105_rep_c323	mf105_rep_c29760
323	mf105_rep_c324	mf105_rep_c44657	mf105_s53661	mf105_s76158
324	mf105_rep_c325	mf105_rep_c51657	mf105_s56624	mf105_s63795	mf105_s65202
325	mf105_rep_c326	mf105_rep_c30147	mf105_s67479
326	mf105_rep_c327	mf105_rep_c16513	mf105_s56713	mf105_s59867	mf105_s61358
327	mf105_rep_c328	mf105_s52002	mf105_s55004	mf105_s73648
329	mf105_rep_c330	mf105_rep_c41916	mf105_rep_c45764	mf105_s60779	mf105_s65089
330	mf105_rep_c331	mf105_s58390	mf105_s76205
331	mf105_rep_c332	mf105_s68047	mf105_s71238
332	mf105_rep_c333	mf105_rep_c21283	mf105_rep_c44575
333	mf105_rep_c334	mf105_s53851	mf105_s56929	mf105_s61539	mf105_s69545
334	mf105_rep_c335	mf105_rep_c33742	mf105_s65329	mf105_s67093
335	mf105_rep_c336	mf105_rep_c38107	mf105_s63191	mf105_s64782
336	mf105_rep_c337	mf105_rep_c41729	mf105_s56298	mf105_s65478	mf105_s66211
337	mf105_rep_c338	mf105_rep_c13811	mf105_rep_c29954	mf105_s53049	mf105_s60991	mf105_s63524	mf105_s69997
338	mf105_rep_c339	mf105_rep_c32388	mf105_s65699
339	mf105_rep_c340	mf105_s58739
340	mf105_rep_c341	mf105_s63536	mf105_rep_c67604
341	mf105_rep_c342	mf105_rep_c35215	mf105_rep_c47625	mf105_s51337	mf105_s54149
342	mf105_rep_c343	mf105_rep_c10996	mf105_s70494
343	mf105_rep_c344	mf105_s68650	mf105_s73692	mf105_s74423
344	mf105_rep_c345	mf105_s56268	mf105_s57840	mf105_s59068
345	mf105_rep_c346	mf105_s57461	mf105_s70407	mf105_s74358
346	mf105_rep_c347	mf105_s63757
347	mf105_rep_c348	mf105_rep_c16696	mf105_s50800	mf105_s65193
348	mf105_rep_c349	mf105_rep_c36194	mf105_s62137
349	mf105_rep_c350	mf105_rep_c37506	mf105_s59890	mf105_s60373
351	mf105_rep_c352	mf105_rep_c15914	mf105_rep_c26913	mf105_rep_c31209	mf105_s56083	mf105_s58237	mf105_s61066
352	mf105_rep_c353	mf105_rep_c42735
353	mf105_rep_c354	mf105_s52476
354	mf105_rep_c355	mf105_s59798	mf105_s60132
355	mf105_rep_c356	mf105_s56090	mf105_s61628	mf105_s70531
356	mf105_rep_c357	mf105_s68502	mf105_s73119
357	mf105_rep_c358	mf105_rep_c48282	mf105_rep_c48296	mf105_s49150	mf105_rep_c60194	mf105_s64850
358	mf105_rep_c359	mf105_s57901	mf105_s69520
359	mf105_rep_c360	mf105_s50659	mf105_s60032	mf105_s64046	mf105_s64179	mf105_s68379	mf105_s74014	mf105_s74857
360	mf105_rep_c361	mf105_s67114
361	mf105_rep_c362	mf105_rep_c38545	mf105_s54440	mf105_s57544
362	mf105_rep_c363	mf105_rep_c28542
363	mf105_rep_c364	mf105_s70706
364	mf105_rep_c365	mf105_s71537
365	mf105_rep_c366	mf105_c27173	mf105_s49512	mf105_s49702	mf105_rep_c51991	mf105_s53323	mf105_s53936	mf105_s54218	mf105_s56432	mf105_s65130	mf105_s69915	mf105_s74803	mf105_s75350
366	mf105_rep_c367	mf105_rep_c60558
367	mf105_rep_c368	mf105_s72819
368	mf105_rep_c369	mf105_s52267	mf105_s56883	mf105_s66329	mf105_s68073
369	mf105_rep_c370	mf105_s68865	mf105_s71498
372	mf105_rep_c373	mf105_rep_c27288	mf105_s52731
373	mf105_rep_c374	mf105_rep_c27827	mf105_s53154
374	mf105_rep_c375	mf105_s61174	mf105_s66791	mf105_s67008
375	mf105_rep_c376	mf105_rep_c36290	mf105_rep_c44895	mf105_s52196	mf105_s70771	mf105_s75669
376	mf105_rep_c377	mf105_s49056
377	mf105_rep_c378	mf105_rep_c48153	mf105_s71022
378	mf105_rep_c379	mf105_s55667	mf105_s70231
379	mf105_rep_c380	mf105_rep_c36329	mf105_s53350	mf105_s65538	mf105_s74910
380	mf105_rep_c381	mf105_rep_c48406	mf105_s60935	mf105_s73176
381	mf105_rep_c382	mf105_rep_c47569
382	mf105_rep_c383	mf105_s58253	mf105_s74234
383	mf105_rep_c384	mf105_rep_c40086	mf105_s57262	mf105_s65188
385	mf105_rep_c386	mf105_s57813	mf105_s61044	mf105_s66606	mf105_s68161
386	mf105_rep_c387	mf105_rep_c39125	mf105_s55548	mf105_s61957	mf105_s62474	mf105_s62979
387	mf105_rep_c388	mf105_rep_c47147	mf105_s52570	mf105_s71607	mf105_s74028
388	mf105_rep_c389	mf105_s58003	mf105_s66959	mf105_s74986
389	mf105_rep_c390	mf105_rep_c22332	mf105_s62304
390	mf105_rep_c391	mf105_rep_c41778	mf105_s50267	mf105_s52202	mf105_s53709
391	mf105_rep_c392	mf105_rep_c32445	mf105_s64886	mf105_s66723	mf105_s68139
392	mf105_rep_c393	mf105_rep_c47386	mf105_s55057
393	mf105_rep_c394	mf105_s69263
394	mf105_rep_c395	mf105_rep_c38941
396	mf105_rep_c397	mf105_s56287	mf105_rep_c62935
397	mf105_rep_c398	mf105_s59483	mf105_s67232
398	mf105_rep_c399	mf105_rep_c52800	mf105_s66174
399	mf105_rep_c400	mf105_rep_c20014	mf105_s58938	mf105_s70757	mf105_s70832
400	mf105_rep_c401	mf105_s49308
401	mf105_rep_c402	mf105_s50586	mf105_s55702	mf105_s56963	mf105_s60652	mf105_s68253
402	mf105_rep_c403	mf105_s56221
403	mf105_rep_c404	mf105_rep_c39033
404	mf105_rep_c405	mf105_s64038	mf105_s73803
405	mf105_rep_c406	mf105_rep_c16713	mf105_s60900
406	mf105_rep_c407	mf105_rep_c40998	mf105_s57392	mf105_s66964
407	mf105_rep_c408	mf105_s55270	mf105_s71450
408	mf105_rep_c409	mf105_s65167
409	mf105_rep_c410	mf105_rep_c28335	mf105_s38221	mf105_rep_c38279	mf105_s48753	mf105_s49280	mf105_s60219	mf105_s61017	mf105_s62971	mf105_s64779	mf105_s70890
410	mf105_rep_c411	mf105_s73440
411	mf105_rep_c412	mf105_rep_c28693	mf105_s58868	mf105_s73456
412	mf105_rep_c413	mf105_s61114
413	mf105_rep_c414	mf105_s61678	mf105_s70317	mf105_s72746
414	mf105_rep_c415	mf105_s55737	mf105_s67791	mf105_s69592
415	mf105_rep_c416	mf105_rep_c33656	mf105_rep_c42829	mf105_rep_c43676	mf105_s50475	mf105_s62112
416	mf105_rep_c417	mf105_s55237
417	mf105_rep_c418	mf105_rep_c21198	mf105_rep_c27573	mf105_s57873	mf105_s75046
418	mf105_rep_c419	mf105_rep_c29144	mf105_rep_c35517	mf105_s55872	mf105_s64814	mf105_s67083
419	mf105_rep_c420	mf105_rep_c41907	mf105_s63223
420	mf105_rep_c421	mf105_rep_c47463
421	mf105_rep_c422	mf105_rep_c17273
422	mf105_rep_c423	mf105_rep_c42363	mf105_s69609
423	mf105_rep_c424	mf105_rep_c25810	mf105_rep_c37390	mf105_rep_c40421	mf105_rep_c47445
424	mf105_rep_c425	mf105_rep_c25256	mf105_s57717	mf105_s67499	mf105_s69846
425	mf105_rep_c426	mf105_rep_c7964	mf105_s51801	mf105_s55925	mf105_s61400
426	mf105_rep_c427	mf105_rep_c17145	mf105_rep_c17375	mf105_rep_c26676	mf105_s73292	mf105_s74403
427	mf105_rep_c428	mf105_rep_c19162	mf105_s67411
428	mf105_rep_c429	mf105_s72286
429	mf105_rep_c430	mf105_s51314	mf105_rep_c55017
430	mf105_rep_c431	mf105_rep_c14824
431	mf105_rep_c432	mf105_s65769
432	mf105_rep_c433	mf105_s55642
433	mf105_rep_c434	mf105_rep_c2402	mf105_s57069
434	mf105_rep_c435	mf105_s63256	mf105_s73964	mf105_s74201
435	mf105_rep_c436	mf105_rep_c43176	mf105_c43785	mf105_rep_c45052	mf105_s58115	mf105_s60201	mf105_s60399	mf105_s61930
436	mf105_rep_c437	mf105_rep_c20623	mf105_rep_c29994	mf105_rep_c43307
437	mf105_rep_c438	mf105_s48642	mf105_s58831
438	mf105_rep_c439	mf105_s52790	mf105_s54151	mf105_s65178	mf105_s69866
439	mf105_rep_c440	mf105_s53664	mf105_s74726
440	mf105_rep_c441	mf105_rep_c16397	mf105_s64468	mf105_s74544
441	mf105_rep_c442	mf105_rep_c33068	mf105_rep_c38629	mf105_rep_c46809	mf105_s48290	mf105_s48382	mf105_s48961	mf105_s53291	mf105_s53737	mf105_s54413	mf105_s55047	mf105_s56547	mf105_s59684	mf105_s59693	mf105_s61860	mf105_s61961	mf105_s62145	mf105_s62338	mf105_s65053	mf105_s67277	mf105_s70550	mf105_s71312	mf105_s72728	mf105_s74396	mf105_s75201
442	mf105_rep_c443	mf105_s57234	mf105_s58074	mf105_s67246
443	mf105_rep_c444	mf105_s72357
444	mf105_rep_c445	mf105_s67972	mf105_s70512
445	mf105_rep_c446	mf105_s57456
446	mf105_rep_c447	mf105_s61599	mf105_s67780
447	mf105_rep_c448	mf105_rep_c22053	mf105_rep_c22984	mf105_rep_c23031	mf105_rep_c40991	mf105_s50463	mf105_s52606	mf105_s55510	mf105_s59103	mf105_s59230	mf105_s61605	mf105_s65665	mf105_s65703	mf105_s75632
448	mf105_rep_c449	mf105_s55150
449	mf105_rep_c450	mf105_rep_c13937	mf105_s55120
450	mf105_rep_c451	mf105_s51913	mf105_s59714	mf105_s70545	mf105_s75445
451	mf105_rep_c452	mf105_s75844
452	mf105_rep_c453	mf105_rep_c27997
453	mf105_rep_c454	mf105_s54426
454	mf105_rep_c455	mf105_rep_c20609	mf105_s57507	mf105_s62148
455	mf105_rep_c456	mf105_s54628	mf105_s64832
456	mf105_rep_c457	mf105_rep_c47689	mf105_s60616	mf105_s70508
457	mf105_rep_c458	mf105_rep_c31752	mf105_s51210	mf105_s72321
458	mf105_rep_c459	mf105_s53427	mf105_s69507
459	mf105_rep_c460	mf105_s58851	mf105_s66433
460	mf105_rep_c461	mf105_s57722	mf105_s60338
461	mf105_rep_c462	mf105_s59167	mf105_s70792	mf105_s71794
462	mf105_rep_c463	mf105_rep_c40924	mf105_s54123	mf105_s58085
463	mf105_rep_c464	mf105_rep_c32422	mf105_s67109	mf105_s73823
464	mf105_rep_c465	mf105_s64897
465	mf105_rep_c466	mf105_s51745	mf105_s52945	mf105_s72362
466	mf105_rep_c467	mf105_rep_c45725	mf105_rep_c46615
467	mf105_rep_c468	mf105_rep_c29428	mf105_s71471
468	mf105_rep_c469	mf105_s69739	mf105_s75777
469	mf105_rep_c470	mf105_rep_c47383
470	mf105_rep_c471	mf105_rep_c38642	mf105_s62915	mf105_s63122
471	mf105_rep_c472	mf105_s67166	mf105_s71713
472	mf105_rep_c473	mf105_s53612	mf105_rep_c62332	mf105_s67694
473	mf105_rep_c474	mf105_s55674	mf105_s60958
474	mf105_rep_c475	mf105_rep_c39854
475	mf105_rep_c476	mf105_rep_c33108	mf105_s52536	mf105_s71852	mf105_s75126
476	mf105_rep_c477	mf105_rep_c22953	mf105_rep_c39586	mf105_s51701	mf105_s60209
477	mf105_rep_c478	mf105_rep_c25204	mf105_rep_c40877	mf105_s64391
479	mf105_rep_c480	mf105_s56822
480	mf105_rep_c481	mf105_s56985
481	mf105_rep_c482	mf105_s74444
482	mf105_rep_c483	mf105_s49394	mf105_s58345
483	mf105_rep_c484	mf105_s55138
485	mf105_rep_c486	mf105_s51140	mf105_s70131	mf105_s75732
486	mf105_rep_c487	mf105_s68435	mf105_s73027
487	mf105_rep_c488	mf105_rep_c40977	mf105_s49556	mf105_s64367	mf105_s64949	mf105_s69779
488	mf105_rep_c489	mf105_s60676
489	mf105_rep_c490	mf105_s36591	mf105_s65793	mf105_s74445	mf105_s74768	mf105_s76230
490	mf105_rep_c491	mf105_rep_c24000	mf105_rep_c46051	mf105_s52049	mf105_s60846	mf105_s66779	mf105_s69375
491	mf105_rep_c492	mf105_rep_c41330	mf105_s58977	mf105_s62106	mf105_s72894
492	mf105_rep_c493	mf105_rep_c24974	mf105_rep_c33303
493	mf105_rep_c494	mf105_s74992
494	mf105_rep_c495	mf105_rep_c30248	mf105_rep_c50566	mf105_s55198
495	mf105_rep_c496	mf105_rep_c31837	mf105_rep_c35309
496	mf105_rep_c497	mf105_rep_c40433
497	mf105_rep_c498	mf105_c47294	mf105_s49990
498	mf105_rep_c499	mf105_s59211
499	mf105_rep_c500	mf105_rep_c29613	mf105_s59711	mf105_s68926
500	mf105_rep_c501	mf105_s56800	mf105_s69836	mf105_s75009
501	mf105_rep_c502	mf105_s54166	mf105_s57643
502	mf105_rep_c503	mf105_s69572
503	mf105_rep_c504	mf105_s51152	mf105_s51906	mf105_s54506
504	mf105_rep_c505	mf105_rep_c30240	mf105_rep_c35370	mf105_rep_c38301	mf105_rep_c38859	mf105_rep_c40142	mf105_rep_c42695	mf105_rep_c45470	mf105_c47902	mf105_s48288	mf105_rep_c48347	mf105_s48480	mf105_s49463	mf105_s50340	mf105_s53962	mf105_s60228	mf105_s60291	mf105_s72077
506	mf105_rep_c507	mf105_rep_c29599	mf105_rep_c43378
507	mf105_rep_c508	mf105_rep_c15236	mf105_rep_c25518	mf105_s48945	mf105_s71771
508	mf105_rep_c509	mf105_s56752	mf105_s71359
509	mf105_rep_c510	mf105_s36274	mf105_rep_c38722	mf105_s72881
510	mf105_rep_c511	mf105_rep_c47318	mf105_s49470	mf105_s73756
511	mf105_rep_c512	mf105_s71135
512	mf105_rep_c513	mf105_s59789	mf105_s71366
513	mf105_rep_c514	mf105_rep_c32042	mf105_s52298	mf105_s53794
514	mf105_rep_c515	mf105_s57198	mf105_s63535
515	mf105_rep_c516	mf105_rep_c49028	mf105_rep_c53306	mf105_s55739	mf105_s56830
516	mf105_rep_c517	mf105_s57776	mf105_s57787
517	mf105_rep_c518	mf105_rep_c48203	mf105_s60738	mf105_s66229	mf105_s69931
518	mf105_rep_c519	mf105_rep_c20525	mf105_rep_c52862	mf105_s58708
519	mf105_rep_c520	mf105_rep_c14631	mf105_s52823	mf105_s60618
520	mf105_rep_c521	mf105_rep_c20414	mf105_s42209	mf105_s51969
521	mf105_rep_c522	mf105_rep_c8129
522	mf105_rep_c523	mf105_s55542	mf105_s63232
523	mf105_rep_c524	mf105_c48188	mf105_s71086
524	mf105_rep_c525	mf105_rep_c49600	mf105_s55206
525	mf105_rep_c526	mf105_rep_c14820	mf105_rep_c35042	mf105_rep_c39441	mf105_s49034	mf105_s49264	mf105_s54545	mf105_s67908
526	mf105_rep_c527	mf105_rep_c13048	mf105_rep_c17762	mf105_rep_c23183	mf105_rep_c30450	mf105_rep_c44308	mf105_rep_c46364	mf105_s72396
527	mf105_rep_c528	mf105_s51168	mf105_s69164	mf105_s72182
529	mf105_rep_c530	mf105_rep_c33811	mf105_rep_c40047	mf105_s58054
530	mf105_rep_c531	mf105_s63572
531	mf105_rep_c532	mf105_c47286	mf105_s57772	mf105_s69492	mf105_s71719
532	mf105_rep_c533	mf105_s74418
533	mf105_rep_c534	mf105_rep_c28087	mf105_rep_c48920	mf105_rep_c49538	mf105_s69139	mf105_s69886	mf105_s70181
534	mf105_rep_c535	mf105_rep_c44991	mf105_rep_c47350	mf105_s59388	mf105_s66118	mf105_s67677	mf105_s75426
535	mf105_rep_c536	mf105_rep_c44598
537	mf105_rep_c538	mf105_rep_c16934	mf105_s61667
538	mf105_rep_c539	mf105_s60389
539	mf105_rep_c540	mf105_rep_c39459	mf105_rep_c44709	mf105_s48806
540	mf105_rep_c541	mf105_s58211
541	mf105_rep_c542	mf105_s65975
543	mf105_rep_c544	mf105_rep_c38160	mf105_s68698
544	mf105_rep_c545	mf105_rep_c35121	mf105_s60082
545	mf105_rep_c546	mf105_s74387
546	mf105_rep_c547	mf105_s62745	mf105_s64899
547	mf105_rep_c548	mf105_rep_c48216	mf105_s66660
548	mf105_rep_c549	mf105_s53822	mf105_s55731
549	mf105_rep_c550	mf105_rep_c25816	mf105_rep_c48249	mf105_s75054	mf105_s76169
551	mf105_rep_c552	mf105_s51585	mf105_s65658	mf105_s68182
552	mf105_rep_c553	mf105_s67671	mf105_s70870
553	mf105_rep_c554	mf105_rep_c31450	mf105_rep_c31617	mf105_rep_c35145	mf105_rep_c39735	mf105_rep_c41256	mf105_rep_c42837	mf105_rep_c44778	mf105_rep_c45178	mf105_rep_c47504	mf105_rep_c48291	mf105_rep_c48312	mf105_s48320	mf105_s48409	mf105_s48453	mf105_s48479	mf105_s48496	mf105_s48497	mf105_s48559	mf105_rep_c48664	mf105_rep_c48667	mf105_s48722	mf105_s49037	mf105_s49072	mf105_s51606	mf105_s59592	mf105_s60074	mf105_s60112	mf105_s60124	mf105_s60139	mf105_s60156	mf105_s60157	mf105_s60162	mf105_s60205	mf105_s60222	mf105_s60232	mf105_s60273	mf105_rep_c60326	mf105_s60442	mf105_s60533	mf105_rep_c60543	mf105_rep_c60610	mf105_s64568	mf105_s64829	mf105_s71972
554	mf105_rep_c555	mf105_rep_c45969	mf105_s58015
555	mf105_rep_c556	mf105_rep_c16069	mf105_s48574	mf105_s63248	mf105_s64712
556	mf105_rep_c557	mf105_rep_c27473	mf105_rep_c42756	mf105_s56391	mf105_s62885	mf105_s72652
557	mf105_rep_c558	mf105_rep_c25498	mf105_rep_c41214	mf105_rep_c41554	mf105_rep_c44004
558	mf105_rep_c559	mf105_s48139	mf105_s54109	mf105_s72030
559	mf105_rep_c560	mf105_s56856
560	mf105_rep_c561	mf105_rep_c37332
561	mf105_rep_c562	mf105_rep_c14715	mf105_rep_c17178	mf105_s57973	mf105_s64110	mf105_s64592	mf105_s67686	mf105_s67983
562	mf105_rep_c563	mf105_rep_c35135	mf105_s50378	mf105_s57169	mf105_s65666
563	mf105_rep_c564	mf105_s56425	mf105_s57818	mf105_s62326	mf105_s65601
564	mf105_rep_c565	mf105_rep_c15577	mf105_rep_c34068	mf105_s73282
565	mf105_rep_c566	mf105_rep_c30525
566	mf105_rep_c567	mf105_rep_c30074	mf105_s49478	mf105_s58274	mf105_s67721	mf105_s67912
567	mf105_rep_c568	mf105_rep_c26298	mf105_rep_c46340	mf105_s51447	mf105_s55645	mf105_s67563
568	mf105_rep_c569	mf105_s46089	mf105_s72586
569	mf105_rep_c570	mf105_rep_c38879	mf105_s72165
570	mf105_rep_c571	mf105_s48084	mf105_s60241
571	mf105_rep_c572	mf105_rep_c35276	mf105_s66078	mf105_s71174
572	mf105_rep_c573	mf105_s56687	mf105_s73321
573	mf105_rep_c574	mf105_rep_c30277
574	mf105_rep_c575	mf105_s63574	mf105_s69351	mf105_s75202
575	mf105_rep_c576	mf105_rep_c5716	mf105_s57594	mf105_s69966	mf105_s76279
576	mf105_rep_c577	mf105_s49247
577	mf105_rep_c578	mf105_rep_c43529	mf105_s73937	mf105_s74370
578	mf105_rep_c579	mf105_rep_c32951	mf105_s71336
579	mf105_rep_c580	mf105_s61213	mf105_s65382
580	mf105_rep_c581	mf105_rep_c23270	mf105_s50166	mf105_s60805	mf105_s65150	mf105_s70727
581	mf105_rep_c582	mf105_rep_c43543	mf105_rep_c46494	mf105_c48037
582	mf105_rep_c583	mf105_rep_c28694	mf105_s52028	mf105_s61509
583	mf105_rep_c584	mf105_rep_c24221	mf105_s69383
584	mf105_rep_c585	mf105_rep_c52519	mf105_s72592
585	mf105_rep_c586	mf105_s50834	mf105_s52841	mf105_s65259
586	mf105_rep_c587	mf105_s60686
587	mf105_rep_c588	mf105_s73323
589	mf105_rep_c590	mf105_rep_c38361	mf105_s55279	mf105_s67886	mf105_s74872
590	mf105_rep_c591	mf105_s49662	mf105_s54817	mf105_s62986	mf105_s72983
591	mf105_rep_c592	mf105_rep_c24555
592	mf105_rep_c593	mf105_rep_c27372	mf105_rep_c40347	mf105_s50669	mf105_s65015	mf105_s72575	mf105_s73097
593	mf105_rep_c594	mf105_s51445	mf105_s65249	mf105_s66013
595	mf105_rep_c596	mf105_rep_c25848
597	mf105_rep_c598	mf105_rep_c34072	mf105_s69281
598	mf105_rep_c599	mf105_rep_c44675	mf105_s48660	mf105_s59047	mf105_s75131
599	mf105_rep_c600	mf105_rep_c31125	mf105_rep_c41002
600	mf105_rep_c601	mf105_s59936
601	mf105_rep_c602	mf105_rep_c33169	mf105_s60372	mf105_s75365
602	mf105_rep_c603	mf105_s70142	mf105_s70755
603	mf105_rep_c604	mf105_s54824	mf105_s56979	mf105_s58114
604	mf105_rep_c605	mf105_rep_c35879	mf105_s54890	mf105_s68456
605	mf105_rep_c606	mf105_rep_c24442	mf105_s64884	mf105_s66876
606	mf105_rep_c607	mf105_rep_c43580	mf105_s58718	mf105_s74559
607	mf105_rep_c608	mf105_s52116	mf105_s62616	mf105_s74646
608	mf105_rep_c609	mf105_s57988	mf105_s63945	mf105_s69852	mf105_s71725	mf105_s72346
609	mf105_rep_c610	mf105_rep_c41685	mf105_rep_c48242
610	mf105_rep_c611	mf105_rep_c44419	mf105_s64508
611	mf105_rep_c612	mf105_rep_c4972	mf105_rep_c31775	mf105_rep_c33054	mf105_rep_c50347	mf105_s74483
612	mf105_rep_c613	mf105_rep_c47914
613	mf105_rep_c614	mf105_s56437
615	mf105_rep_c616	mf105_rep_c48066	mf105_s51206	mf105_s67061	mf105_s70739
616	mf105_rep_c617	mf105_rep_c46779	mf105_s52739	mf105_s58040	mf105_s69328
617	mf105_rep_c618	mf105_s75941
618	mf105_rep_c619	mf105_rep_c26434	mf105_rep_c46198	mf105_s56139	mf105_s67485
619	mf105_rep_c620	mf105_s72440
620	mf105_rep_c621	mf105_c47000	mf105_s63022	mf105_s75767
621	mf105_rep_c622	mf105_rep_c26165	mf105_s54731	mf105_s60706
622	mf105_rep_c623	mf105_s55619	mf105_s68494	mf105_s72132
623	mf105_rep_c624	mf105_s52644
624	mf105_rep_c625	mf105_rep_c40016	mf105_s55357	mf105_s63555	mf105_s63810
625	mf105_rep_c626	mf105_rep_c46938
626	mf105_rep_c627	mf105_rep_c27033	mf105_rep_c41810	mf105_s68413	mf105_s75183
627	mf105_rep_c628	mf105_rep_c16701	mf105_rep_c40996	mf105_s69881
629	mf105_rep_c630	mf105_s50342
630	mf105_rep_c631	mf105_s65725	mf105_s71357
631	mf105_rep_c632	mf105_s55493	mf105_s57019	mf105_s69085	mf105_s69839
632	mf105_rep_c633	mf105_rep_c46260	mf105_s48957	mf105_s54056	mf105_s54107	mf105_s58297
633	mf105_rep_c634	mf105_rep_c46784	mf105_rep_c48102	mf105_s63150	mf105_s65066
634	mf105_rep_c635	mf105_rep_c47882	mf105_s66165	mf105_s73251
635	mf105_rep_c636	mf105_rep_c33039	mf105_rep_c41891	mf105_s52150	mf105_s52990	mf105_s63706
637	mf105_rep_c638	mf105_rep_c17776	mf105_s48451	mf105_s70068
638	mf105_rep_c639	mf105_rep_c24534	mf105_s67142	mf105_s70589	mf105_s72049
639	mf105_rep_c640	mf105_rep_c29732	mf105_rep_c39288	mf105_s54340	mf105_s59984	mf105_s62110	mf105_s63458	mf105_s68382	mf105_s73015
640	mf105_rep_c641	mf105_c24824	mf105_rep_c37545	mf105_s57387	mf105_s74467
642	mf105_rep_c643	mf105_s49849
643	mf105_rep_c644	mf105_s60048
644	mf105_rep_c645	mf105_rep_c31874	mf105_rep_c43328	mf105_s48276	mf105_s50684	mf105_s71126	mf105_s73437	mf105_s74578
645	mf105_rep_c646	mf105_rep_c28832
646	mf105_rep_c647	mf105_s58982
647	mf105_rep_c648	mf105_rep_c33332	mf105_s63652	mf105_s68878
648	mf105_rep_c649	mf105_rep_c23927
649	mf105_rep_c650	mf105_rep_c41441	mf105_rep_c48195	mf105_s70676
650	mf105_rep_c651	mf105_s67182
651	mf105_rep_c652	mf105_s54495	mf105_s70096
652	mf105_rep_c653	mf105_rep_c39271	mf105_s70280
653	mf105_rep_c654	mf105_rep_c38764	mf105_rep_c39287	mf105_s55287	mf105_s73911
654	mf105_rep_c655	mf105_s71037
655	mf105_rep_c656	mf105_s49075
657	mf105_rep_c658	mf105_rep_c36960	mf105_s57475	mf105_s75030
658	mf105_rep_c659	mf105_s56134
659	mf105_rep_c660	mf105_rep_c44556	mf105_s51806	mf105_s59165	mf105_s74609
661	mf105_rep_c662	mf105_rep_c44819	mf105_s50971	mf105_s51821	mf105_s69557
662	mf105_rep_c663	mf105_rep_c28486	mf105_s55258	mf105_s69565
663	mf105_rep_c664	mf105_s58278	mf105_s64142
664	mf105_rep_c665	mf105_rep_c39615	mf105_s54045	mf105_s58651	mf105_s69311
665	mf105_rep_c666	mf105_s69441	mf105_s71268
666	mf105_rep_c667	mf105_s53212	mf105_s61703	mf105_s65969	mf105_s68852
667	mf105_rep_c668	mf105_rep_c27110	mf105_s70385
668	mf105_rep_c669	mf105_rep_c20800	mf105_rep_c35166
669	mf105_rep_c670	mf105_rep_c22640	mf105_rep_c41552	mf105_s57166	mf105_s58125	mf105_s68388
670	mf105_rep_c671	mf105_rep_c9475	mf105_rep_c35484	mf105_s56762	mf105_s70202	mf105_s74145
672	mf105_rep_c673	mf105_rep_c25598	mf105_s59461	mf105_s65916
674	mf105_rep_c675	mf105_s63997
675	mf105_rep_c676	mf105_s69536
677	mf105_rep_c678	mf105_s53176
678	mf105_rep_c679	mf105_s50678
679	mf105_rep_c680	mf105_rep_c25329	mf105_rep_c34680	mf105_s65228	mf105_s75713
680	mf105_rep_c681	mf105_c35385	mf105_s58562
681	mf105_rep_c682	mf105_s58757	mf105_s66728
682	mf105_rep_c683	mf105_rep_c43466	mf105_s70606
683	mf105_rep_c684	mf105_rep_c48969	mf105_s51243	mf105_s64019	mf105_s66204
684	mf105_rep_c685	mf105_s58011
685	mf105_rep_c686	mf105_rep_c43683	mf105_s57571	mf105_s58066
687	mf105_rep_c688	mf105_rep_c41257	mf105_s56602
688	mf105_rep_c689	mf105_rep_c35628	mf105_s67483
689	mf105_rep_c690	mf105_rep_c12164	mf105_s48962	mf105_s66657	mf105_s70940	mf105_s73342	mf105_s75208
690	mf105_rep_c691	mf105_rep_c26131	mf105_rep_c45970	mf105_s54605
691	mf105_rep_c692	mf105_s53392	mf105_s62088	mf105_s69022	mf105_s69828
692	mf105_rep_c693	mf105_s52850	mf105_s70250	mf105_s75018
693	mf105_rep_c694	mf105_rep_c34487	mf105_s54320	mf105_s59783	mf105_s74215
694	mf105_rep_c695	mf105_rep_c46375	mf105_s51649	mf105_s59781
695	mf105_rep_c696	mf105_s55931
696	mf105_rep_c697	mf105_rep_c29891	mf105_s52165	mf105_s72223
697	mf105_rep_c698	mf105_rep_c35360
698	mf105_rep_c699	mf105_s50523	mf105_s61068	mf105_s61956
699	mf105_rep_c700	mf105_s75888
700	mf105_rep_c701	mf105_s61447
702	mf105_rep_c703	mf105_rep_c3409	mf105_s60507
703	mf105_rep_c704	mf105_s65476	mf105_s69918	mf105_s70896	mf105_s72733
704	mf105_rep_c705	mf105_s57460	mf105_s69234
705	mf105_rep_c706	mf105_rep_c24604	mf105_s65620	mf105_s70306	mf105_s70548	mf105_s72900	mf105_s74334
706	mf105_rep_c707	mf105_rep_c14895	mf105_s66451	mf105_s70204
707	mf105_rep_c708	mf105_rep_c45554	mf105_s48977	mf105_s66810	mf105_s66864	mf105_s66893
708	mf105_rep_c709	mf105_s70445	mf105_s76106
709	mf105_rep_c710	mf105_s75479
710	mf105_rep_c711	mf105_s53485
711	mf105_rep_c712	mf105_rep_c43604	mf105_s49855	mf105_s69702
712	mf105_rep_c713	mf105_rep_c32132	mf105_s58536
714	mf105_rep_c715	mf105_s51276	mf105_s61889
715	mf105_rep_c716	mf105_s65222	mf105_s66345
716	mf105_rep_c717	mf105_rep_c46531
717	mf105_rep_c718	mf105_rep_c18594	mf105_rep_c30734	mf105_rep_c46630
718	mf105_rep_c719	mf105_rep_c31401	mf105_rep_c54158	mf105_s64770	mf105_s70378	mf105_s71964
719	mf105_rep_c720	mf105_c41998	mf105_rep_c44218	mf105_rep_c44528	mf105_rep_c44799	mf105_rep_c47683	mf105_s56623	mf105_s60433	mf105_s71873
720	mf105_rep_c721	mf105_rep_c16444	mf105_s49868	mf105_s54849	mf105_s58221	mf105_s59505	mf105_s67329	mf105_s67982	mf105_s75961
721	mf105_rep_c722	mf105_s52012
722	mf105_rep_c723	mf105_s58612
723	mf105_rep_c724	mf105_s54207	mf105_s57766
724	mf105_rep_c725	mf105_rep_c9535	mf105_rep_c15871	mf105_rep_c19500	mf105_rep_c28083	mf105_rep_c31024	mf105_rep_c37118	mf105_s50877	mf105_s55907	mf105_s58455	mf105_s67236
725	mf105_rep_c726	mf105_s59331	mf105_s59486
726	mf105_rep_c727	mf105_rep_c36620	mf105_rep_c45038	mf105_s56388	mf105_s71415
727	mf105_rep_c728	mf105_s58412
728	mf105_rep_c729	mf105_rep_c36812
729	mf105_rep_c730	mf105_s57802	mf105_s72210
730	mf105_rep_c731	mf105_s66955	mf105_s73305
731	mf105_rep_c732	mf105_s75894
732	mf105_rep_c733	mf105_rep_c33911	mf105_rep_c34568	mf105_s67010
733	mf105_rep_c734	mf105_s61175
734	mf105_rep_c735	mf105_rep_c37943	mf105_s65468
735	mf105_rep_c736	mf105_rep_c41506	mf105_s57138
736	mf105_rep_c737	mf105_rep_c20632	mf105_s59582	mf105_rep_c60469
737	mf105_rep_c738	mf105_s68551
738	mf105_rep_c739	mf105_rep_c28619	mf105_s71454
739	mf105_rep_c740	mf105_s65659	mf105_s74286
740	mf105_rep_c741	mf105_rep_c6814	mf105_s54574	mf105_s57094	mf105_s71038	mf105_s74783
741	mf105_rep_c742	mf105_rep_c31863	mf105_s74638
742	mf105_rep_c743	mf105_s64997
743	mf105_rep_c744	mf105_s53288
744	mf105_rep_c745	mf105_rep_c29674	mf105_rep_c38609	mf105_s60470
745	mf105_rep_c746	mf105_rep_c29746	mf105_s48994
747	mf105_rep_c748	mf105_s57402	mf105_s70032	mf105_s70169	mf105_s75665
748	mf105_rep_c749	mf105_rep_c4490	mf105_rep_c6383	mf105_rep_c7357	mf105_s64054	mf105_s66285
749	mf105_rep_c750	mf105_rep_c38570
751	mf105_rep_c752	mf105_rep_c39770	mf105_s53743	mf105_s64716	mf105_s72307	mf105_s75646
752	mf105_rep_c753	mf105_rep_c25861	mf105_c42839	mf105_s51791
753	mf105_rep_c754	mf105_s55833
754	mf105_rep_c755	mf105_rep_c10021	mf105_rep_c30880
755	mf105_rep_c756	mf105_rep_c39965
756	mf105_rep_c757	mf105_rep_c34749
757	mf105_rep_c758	mf105_rep_c39841	mf105_s66889	mf105_s68209	mf105_s74151
758	mf105_rep_c759	mf105_s44841	mf105_s48346	mf105_s50115	mf105_s73737
759	mf105_rep_c760	mf105_rep_c37724
760	mf105_rep_c761	mf105_rep_c31456	mf105_rep_c33102	mf105_s50644	mf105_s62101
761	mf105_rep_c762	mf105_s55721	mf105_s64909
764	mf105_rep_c765	mf105_s74375	mf105_s74513
765	mf105_rep_c766	mf105_s54061	mf105_s62424	mf105_s62771
766	mf105_rep_c767	mf105_s53593	mf105_s67021	mf105_s75909
767	mf105_rep_c768	mf105_rep_c24429	mf105_s57080
768	mf105_rep_c769	mf105_rep_c31871	mf105_s54984
769	mf105_rep_c770	mf105_rep_c46501	mf105_s61879
770	mf105_rep_c771	mf105_rep_c5584	mf105_rep_c49245	mf105_s54913	mf105_s55165	mf105_s64481	mf105_s70071
771	mf105_rep_c772	mf105_s53694	mf105_s63969
772	mf105_rep_c773	mf105_c44508	mf105_s57948
773	mf105_rep_c774	mf105_rep_c22579	mf105_s49683	mf105_s54095	mf105_s67664	mf105_s73894
774	mf105_rep_c775	mf105_s48520
775	mf105_rep_c776	mf105_s59130	mf105_s74618
776	mf105_rep_c777	mf105_rep_c45340	mf105_s71066
777	mf105_rep_c778	mf105_s50373
778	mf105_rep_c779	mf105_rep_c6821	mf105_s51500	mf105_s52371	mf105_s75563	mf105_s75780
779	mf105_rep_c780	mf105_rep_c12361	mf105_s70239
780	mf105_rep_c781	mf105_s52487
781	mf105_rep_c782	mf105_rep_c26414	mf105_s57459
782	mf105_rep_c783	mf105_rep_c37289
783	mf105_rep_c784	mf105_rep_c43853	mf105_rep_c46056	mf105_s59738
784	mf105_rep_c785	mf105_rep_c40844	mf105_s53560	mf105_s75382
785	mf105_rep_c786	mf105_s59553	mf105_s68263
786	mf105_rep_c787	mf105_rep_c28650	mf105_rep_c29439	mf105_s61087
787	mf105_rep_c788	mf105_rep_c29957	mf105_rep_c42162	mf105_s50584	mf105_s69478	mf105_s74274
788	mf105_rep_c789	mf105_rep_c38238	mf105_s57369	mf105_s63567	mf105_s71705	mf105_s72153
789	mf105_rep_c790	mf105_rep_c1958	mf105_rep_c15341	mf105_s51945
791	mf105_rep_c792	mf105_rep_c32078	mf105_rep_c40237
792	mf105_rep_c793	mf105_s49650	mf105_s66626
793	mf105_rep_c794	mf105_s57122	mf105_s68044
794	mf105_rep_c795	mf105_s65276
795	mf105_rep_c796	mf105_rep_c33509	mf105_s73532
796	mf105_rep_c797	mf105_rep_c23617	mf105_rep_c29378	mf105_s37473	mf105_s50353	mf105_s55729	mf105_s73983
797	mf105_rep_c798	mf105_rep_c44196	mf105_s64175
798	mf105_rep_c799	mf105_s48594
799	mf105_rep_c800	mf105_rep_c30280	mf105_s73784
800	mf105_rep_c801	mf105_s58368	mf105_s64953	mf105_s75840
801	mf105_rep_c802	mf105_s48661
802	mf105_rep_c803	mf105_rep_c45012	mf105_s67965	mf105_s72914
803	mf105_rep_c804	mf105_rep_c2532
804	mf105_rep_c805	mf105_s51963	mf105_s52635	mf105_s61166	mf105_s65152
806	mf105_rep_c807	mf105_s50957
807	mf105_rep_c808	mf105_rep_c22877	mf105_s59796	mf105_s66854
808	mf105_rep_c809	mf105_s55928	mf105_s58927
809	mf105_rep_c810	mf105_rep_c24518	mf105_s64488
810	mf105_rep_c811	mf105_rep_c47291	mf105_s54400	mf105_s76060
811	mf105_rep_c812	mf105_s61473
812	mf105_rep_c813	mf105_rep_c40538	mf105_rep_c45703	mf105_s48483
814	mf105_rep_c815	mf105_s74294
815	mf105_rep_c816	mf105_rep_c28946	mf105_s52365	mf105_s53815	mf105_s73237
816	mf105_rep_c817	mf105_s53536
817	mf105_rep_c818	mf105_rep_c36755	mf105_rep_c49232	mf105_s55746
818	mf105_rep_c819	mf105_s59011
819	mf105_rep_c820	mf105_rep_c8595	mf105_s61427
820	mf105_rep_c821	mf105_s63925
821	mf105_rep_c822	mf105_s51673	mf105_s61364
822	mf105_rep_c823	mf105_c31615	mf105_rep_c46002	mf105_s58127
823	mf105_rep_c824	mf105_rep_c18982	mf105_s64867
824	mf105_rep_c825	mf105_s63733	mf105_s72355
825	mf105_rep_c826	mf105_s51526	mf105_s55776	mf105_s62494	mf105_s64490	mf105_s74218
826	mf105_rep_c827	mf105_s68977
827	mf105_rep_c828	mf105_rep_c40576	mf105_s58276	mf105_s66123
828	mf105_rep_c829	mf105_rep_c38073	mf105_s70598	mf105_s76072
829	mf105_rep_c830	mf105_rep_c42329	mf105_s50854
830	mf105_rep_c831	mf105_s56105	mf105_s59489
831	mf105_rep_c832	mf105_s58883	mf105_s60876
832	mf105_rep_c833	mf105_rep_c40252	mf105_s53036	mf105_s60843
833	mf105_rep_c834	mf105_rep_c23985	mf105_rep_c34986	mf105_s74128
834	mf105_rep_c835	mf105_s54258	mf105_s63182	mf105_s69016
835	mf105_rep_c836	mf105_s57978
836	mf105_rep_c837	mf105_s51829
837	mf105_rep_c838	mf105_rep_c33616	mf105_rep_c46808
838	mf105_rep_c839	mf105_rep_c37871	mf105_s48685
839	mf105_rep_c840	mf105_s50833
840	mf105_rep_c841	mf105_c43505	mf105_s61706	mf105_s66105	mf105_s72094
841	mf105_rep_c842	mf105_rep_c43988	mf105_s69136
842	mf105_rep_c843	mf105_rep_c44147	mf105_s53805	mf105_s55452
843	mf105_rep_c844	mf105_c45653	mf105_s50585
844	mf105_rep_c845	mf105_rep_c19167	mf105_s57576	mf105_s67326	mf105_s69128
845	mf105_rep_c846	mf105_s58988	mf105_s66035	mf105_s66487
846	mf105_rep_c847	mf105_rep_c41187
847	mf105_rep_c848	mf105_rep_c48007
848	mf105_rep_c849	mf105_s73376
849	mf105_rep_c850	mf105_s38779	mf105_s74866
850	mf105_rep_c851	mf105_s64353
851	mf105_rep_c852	mf105_rep_c39922	mf105_s67871
852	mf105_rep_c853	mf105_rep_c33740	mf105_s56358	mf105_s62709
853	mf105_rep_c854	mf105_s48607	mf105_s69577
854	mf105_rep_c855	mf105_s59237	mf105_s69448
855	mf105_rep_c856	mf105_s55858	mf105_s71470
856	mf105_rep_c857	mf105_s52481	mf105_s58705
857	mf105_rep_c858	mf105_rep_c48120	mf105_s59145	mf105_s68041
858	mf105_rep_c859	mf105_s51927
859	mf105_rep_c860	mf105_s52882	mf105_s55084	mf105_s56329	mf105_s68486
860	mf105_rep_c861	mf105_rep_c30404	mf105_rep_c40395
861	mf105_rep_c862	mf105_s68892
862	mf105_rep_c863	mf105_rep_c37664
863	mf105_rep_c864	mf105_s53632	mf105_s61660	mf105_s62557	mf105_s72690
864	mf105_rep_c865	mf105_s52465	mf105_s55513	mf105_s69180	mf105_s73589
865	mf105_rep_c866	mf105_rep_c31689	mf105_rep_c36985	mf105_s48730	mf105_s60584	mf105_s63910	mf105_s65893
866	mf105_rep_c867	mf105_rep_c22195	mf105_s57731	mf105_s59893	mf105_s63780	mf105_s69669
868	mf105_rep_c869	mf105_rep_c38005
869	mf105_rep_c870	mf105_rep_c39863	mf105_s51627	mf105_s70368
870	mf105_rep_c871	mf105_rep_c14977	mf105_rep_c22234	mf105_rep_c46954	mf105_s48447	mf105_s50596
871	mf105_rep_c872	mf105_s55081	mf105_s58111	mf105_s71485
872	mf105_rep_c873	mf105_rep_c41765	mf105_rep_c46252	mf105_rep_c51921	mf105_s68200	mf105_s73513
873	mf105_rep_c874	mf105_rep_c41029	mf105_c44864	mf105_s49527	mf105_s73302	mf105_s74608
874	mf105_rep_c875	mf105_rep_c48183	mf105_s53401
875	mf105_rep_c876	mf105_s65118	mf105_s67920
876	mf105_rep_c877	mf105_s50639	mf105_s53404	mf105_s65584	mf105_s66397	mf105_s75304
877	mf105_rep_c878	mf105_rep_c47719
879	mf105_rep_c880	mf105_rep_c46883	mf105_s56056
880	mf105_rep_c881	mf105_rep_c31489	mf105_rep_c37762
881	mf105_rep_c882	mf105_s57835	mf105_s69428	mf105_s70013
882	mf105_rep_c883	mf105_s66162
883	mf105_rep_c884	mf105_rep_c47750	mf105_s62829
884	mf105_rep_c885	mf105_s52682	mf105_s68897	mf105_s74581
885	mf105_rep_c886	mf105_rep_c31534	mf105_rep_c34024	mf105_s68293
886	mf105_rep_c887	mf105_rep_c44450	mf105_s53740	mf105_s70380	mf105_s71039
888	mf105_rep_c889	mf105_rep_c22518	mf105_rep_c41732	mf105_s48719	mf105_s65863
889	mf105_rep_c890	mf105_s63447
890	mf105_rep_c891	mf105_s50803	mf105_s57675
891	mf105_rep_c892	mf105_rep_c27479	mf105_c47069	mf105_s52697	mf105_s55465	mf105_s56646	mf105_s74823
892	mf105_rep_c893	mf105_rep_c32865
893	mf105_rep_c894	mf105_rep_c39113
894	mf105_rep_c895	mf105_s48430
896	mf105_rep_c897	mf105_s60180	mf105_s68442
897	mf105_rep_c898	mf105_s65295	mf105_s72068
898	mf105_rep_c899	mf105_s67990	mf105_s69879	mf105_s70475	mf105_s71902	mf105_s74072
899	mf105_rep_c900	mf105_rep_c25453	mf105_rep_c26192	mf105_rep_c29582	mf105_s48641	mf105_s64252
900	mf105_rep_c901	mf105_s72483	mf105_s76117
901	mf105_rep_c902	mf105_rep_c19395
902	mf105_rep_c903	mf105_s60088	mf105_s61773	mf105_s65437
903	mf105_rep_c904	mf105_rep_c22354	mf105_s67802
904	mf105_rep_c905	mf105_s49005	mf105_s49094	mf105_s75753
905	mf105_rep_c906	mf105_s70021
906	mf105_rep_c907	mf105_rep_c32379	mf105_c41332	mf105_s54139	mf105_s59940	mf105_s67831	mf105_s72828
907	mf105_rep_c908	mf105_s59958	mf105_s73051
908	mf105_rep_c909	mf105_rep_c35382	mf105_s58072
909	mf105_rep_c910	mf105_s49401	mf105_s62481
911	mf105_rep_c912	mf105_rep_c17313	mf105_c44622	mf105_c47413	mf105_rep_c52070	mf105_s53222	mf105_s57607	mf105_s75857
912	mf105_rep_c913	mf105_s50973	mf105_s54298	mf105_s67601	mf105_s72108
913	mf105_rep_c914	mf105_s48741	mf105_s69327
914	mf105_rep_c915	mf105_rep_c19497	mf105_s70025	mf105_s71276	mf105_s73133
915	mf105_rep_c916	mf105_rep_c25032	mf105_s49551	mf105_s55831
916	mf105_rep_c917	mf105_rep_c10414	mf105_rep_c44678
917	mf105_rep_c918	mf105_s51388	mf105_s70229
918	mf105_rep_c919	mf105_s66671	mf105_s72230
919	mf105_rep_c920	mf105_s49088
920	mf105_rep_c921	mf105_s56487	mf105_s70329
921	mf105_rep_c922	mf105_s52482	mf105_s58300
922	mf105_rep_c923	mf105_s52627
923	mf105_rep_c924	mf105_s58743
924	mf105_rep_c925	mf105_s58745	mf105_s74930
925	mf105_rep_c926	mf105_s71098
926	mf105_rep_c927	mf105_s67250	mf105_s67592	mf105_s69344	mf105_s73728
927	mf105_rep_c928	mf105_s50928	mf105_s56368	mf105_s67790
928	mf105_rep_c929	mf105_s54540	mf105_s59968	mf105_s70009	mf105_s70989
929	mf105_rep_c930	mf105_rep_c24624	mf105_s54872	mf105_s60429	mf105_s75680
930	mf105_rep_c931	mf105_s59192	mf105_s60384	mf105_s66916	mf105_s69804
931	mf105_rep_c932	mf105_s73272
932	mf105_rep_c933	mf105_s65616	mf105_s65880	mf105_s71048
933	mf105_rep_c934	mf105_s50389	mf105_s64035	mf105_s67498
935	mf105_rep_c936	mf105_rep_c44219
936	mf105_rep_c937	mf105_rep_c12931	mf105_s75468
937	mf105_rep_c938	mf105_rep_c31536	mf105_s70140
938	mf105_rep_c939	mf105_s64697	mf105_s65760
939	mf105_rep_c940	mf105_rep_c41501
940	mf105_rep_c941	mf105_s49518
941	mf105_rep_c942	mf105_rep_c20183	mf105_rep_c26324
942	mf105_rep_c943	mf105_s58990	mf105_s69079
944	mf105_rep_c945	mf105_rep_c27437	mf105_rep_c49407
945	mf105_rep_c946	mf105_rep_c40810	mf105_s58030
946	mf105_rep_c947	mf105_rep_c46022	mf105_s58405	mf105_s60357
947	mf105_rep_c948	mf105_rep_c15318	mf105_s53853	mf105_s58860	mf105_s59317	mf105_s60285	mf105_s61929
948	mf105_rep_c949	mf105_s56280	mf105_s64414
949	mf105_rep_c950	mf105_s48591
950	mf105_rep_c951	mf105_rep_c33263	mf105_s75187
951	mf105_rep_c952	mf105_rep_c28953	mf105_s64296	mf105_s73568
952	mf105_rep_c953	mf105_s53471	mf105_s53714
953	mf105_rep_c954	mf105_s53939	mf105_s55908
954	mf105_rep_c955	mf105_rep_c33610	mf105_s59606	mf105_s59737	mf105_s76213
955	mf105_rep_c956	mf105_s51127	mf105_s52879	mf105_s53206	mf105_s64039	mf105_s69275
956	mf105_rep_c957	mf105_s64047
957	mf105_rep_c958	mf105_rep_c15909	mf105_rep_c16992	mf105_rep_c30456	mf105_rep_c33998	mf105_s53578	mf105_s55154	mf105_s66219	mf105_s72083
958	mf105_rep_c959	mf105_s54452
960	mf105_rep_c961	mf105_rep_c38471	mf105_s73218	mf105_s76074
962	mf105_rep_c963	mf105_rep_c13997	mf105_rep_c22633	mf105_rep_c31668	mf105_s52391	mf105_s70444
964	mf105_rep_c965	mf105_rep_c45735	mf105_s50524	mf105_s55281	mf105_s65803	mf105_s73277
965	mf105_rep_c966	mf105_s71217	mf105_s71315
966	mf105_rep_c967	mf105_s48706
967	mf105_rep_c968	mf105_s61963	mf105_s66530	mf105_s73518
968	mf105_rep_c969	mf105_rep_c23870	mf105_s66792
971	mf105_rep_c972	mf105_s64479
972	mf105_rep_c973	mf105_rep_c32420	mf105_rep_c45816	mf105_rep_c46503	mf105_s53218	mf105_s64249	mf105_s65226	mf105_s66729	mf105_s67741	mf105_s67749
973	mf105_rep_c974	mf105_rep_c47179	mf105_s48534	mf105_s51938	mf105_rep_c52339
974	mf105_rep_c975	mf105_rep_c15808	mf105_s53572	mf105_s59495
975	mf105_rep_c976	mf105_rep_c32760	mf105_s49262	mf105_s56631
976	mf105_rep_c977	mf105_s48989	mf105_s52855
977	mf105_rep_c978	mf105_s63543
978	mf105_rep_c979	mf105_rep_c32350	mf105_s68492	mf105_s72222
979	mf105_rep_c980	mf105_s66877
981	mf105_rep_c982	mf105_s39162	mf105_s56214	mf105_s74091
982	mf105_rep_c983	mf105_s53483
983	mf105_rep_c984	mf105_rep_c28395	mf105_rep_c43138	mf105_s73306
984	mf105_rep_c985	mf105_s65080
985	mf105_rep_c986	mf105_s70446
986	mf105_rep_c987	mf105_s69549
987	mf105_rep_c988	mf105_s55860
988	mf105_rep_c989	mf105_s57742	mf105_s63306	mf105_s70120
989	mf105_rep_c990	mf105_rep_c30065
990	mf105_rep_c991	mf105_rep_c45753	mf105_rep_c47458	mf105_s54979
992	mf105_rep_c993	mf105_s55291	mf105_s60978	mf105_s75480
993	mf105_rep_c994	mf105_s72812
994	mf105_rep_c995	mf105_rep_c38288	mf105_s64914	mf105_s72309
996	mf105_rep_c997	mf105_s64581
997	mf105_rep_c998	mf105_rep_c30449	mf105_s49477	mf105_s53783
998	mf105_rep_c999	mf105_s65092	mf105_s70790	mf105_s71311
999	mf105_rep_c1000	mf105_s55275	mf105_s57777	mf105_s63606	mf105_s65256
1000	mf105_rep_c1001	mf105_s62253	mf105_s74743
1001	mf105_rep_c1002	mf105_s62245	mf105_s75395
1002	mf105_rep_c1003	mf105_s55725	mf105_s63236
1004	mf105_rep_c1005	mf105_s54490	mf105_s55218	mf105_s57824	mf105_s58201
1005	mf105_rep_c1006	mf105_rep_c29392	mf105_s49359	mf105_s67119	mf105_s74260
1006	mf105_rep_c1007	mf105_rep_c17408	mf105_rep_c26942
1007	mf105_rep_c1008	mf105_rep_c45850	mf105_s56616	mf105_s65048
1008	mf105_rep_c1009	mf105_s52853
1009	mf105_rep_c1010	mf105_rep_c30703
1010	mf105_rep_c1011	mf105_s64666
1011	mf105_rep_c1012	mf105_rep_c27636	mf105_rep_c34513
1012	mf105_rep_c1013	mf105_rep_c39153	mf105_s73840
1013	mf105_rep_c1014	mf105_rep_c36045	mf105_s63544
1014	mf105_rep_c1015	mf105_s52794
1015	mf105_rep_c1016	mf105_s70973
1017	mf105_rep_c1018	mf105_rep_c45494	mf105_s49357	mf105_s56701
1018	mf105_rep_c1019	mf105_s51421	mf105_s51954	mf105_s74983
1019	mf105_rep_c1020	mf105_s60464	mf105_s73792
1020	mf105_rep_c1021	mf105_rep_c16676	mf105_rep_c50874	mf105_rep_c52884	mf105_s58137	mf105_s59501	mf105_rep_c69300
1021	mf105_rep_c1022	mf105_s61564
1022	mf105_rep_c1023	mf105_s55260	mf105_s75727
1024	mf105_rep_c1025	mf105_s71170	mf105_s74187
1025	mf105_rep_c1026	mf105_rep_c32134	mf105_rep_c40470	mf105_s54636	mf105_s68889
1026	mf105_rep_c1027	mf105_s50098	mf105_s54662	mf105_s59403
1027	mf105_rep_c1028	mf105_rep_c43014	mf105_s53584
1028	mf105_rep_c1029	mf105_rep_c46231	mf105_s61698	mf105_s62620
1029	mf105_rep_c1030	mf105_s52995	mf105_s69396
1030	mf105_rep_c1031	mf105_rep_c40176	mf105_rep_c43352	mf105_s50986	mf105_s59430	mf105_s70191	mf105_s72169	mf105_s75671
1031	mf105_rep_c1032	mf105_rep_c28035	mf105_s53042	mf105_s68898
1032	mf105_rep_c1033	mf105_rep_c46149	mf105_s53876
1033	mf105_rep_c1034	mf105_s70942
1034	mf105_rep_c1035	mf105_s55936	mf105_s68008	mf105_s68987
1035	mf105_rep_c1036	mf105_rep_c44231	mf105_s64823
1036	mf105_rep_c1037	mf105_s70109
1037	mf105_rep_c1038	mf105_rep_c20121	mf105_s51533	mf105_s62627	mf105_s66133
1038	mf105_rep_c1039	mf105_rep_c5773	mf105_rep_c23714
1039	mf105_rep_c1040	mf105_s50821	mf105_s64546	mf105_s68767
1040	mf105_rep_c1041	mf105_s54040
1041	mf105_rep_c1042	mf105_rep_c12768	mf105_rep_c26407	mf105_rep_c42488	mf105_s71154
1042	mf105_rep_c1043	mf105_rep_c42448	mf105_s63488	mf105_s67782	mf105_s71303
1043	mf105_rep_c1044	mf105_s62232	mf105_s63817
1044	mf105_rep_c1045	mf105_s51137	mf105_s55077	mf105_s64178
1045	mf105_rep_c1046	mf105_s51807	mf105_s53313	mf105_s68417	mf105_s74491
1046	mf105_rep_c1047	mf105_s75405
1047	mf105_rep_c1048	mf105_rep_c24348	mf105_s51422
1048	mf105_rep_c1049	mf105_s49472
1049	mf105_rep_c1050	mf105_s51384	mf105_s63665	mf105_s67717	mf105_s75801
1050	mf105_rep_c1051	mf105_rep_c44931	mf105_s55626	mf105_s60475
1051	mf105_rep_c1052	mf105_rep_c18761	mf105_s49141
1052	mf105_rep_c1053	mf105_rep_c27375	mf105_s65067
1053	mf105_rep_c1054	mf105_s55105	mf105_s59379
1054	mf105_rep_c1055	mf105_rep_c23549	mf105_rep_c49279	mf105_s54279
1055	mf105_rep_c1056	mf105_s58169	mf105_s73797
1058	mf105_rep_c1059	mf105_rep_c32394	mf105_rep_c45771	mf105_s52837	mf105_s63929	mf105_s68202
1059	mf105_rep_c1060	mf105_rep_c45021	mf105_s66642	mf105_s73374
1060	mf105_rep_c1061	mf105_rep_c41535	mf105_s51233	mf105_s53183	mf105_s56438	mf105_s69111	mf105_s69394
1061	mf105_rep_c1062	mf105_s74991
1062	mf105_rep_c1063	mf105_rep_c21407	mf105_s61168	mf105_s70960
1063	mf105_rep_c1064	mf105_s76064
1064	mf105_rep_c1065	mf105_rep_c25517	mf105_rep_c30010	mf105_rep_c32767	mf105_rep_c38826	mf105_s55602	mf105_s59630	mf105_s75486
1067	mf105_rep_c1068	mf105_s61116
1068	mf105_rep_c1069	mf105_rep_c30739	mf105_s59098	mf105_s68774
1069	mf105_rep_c1070	mf105_s50008	mf105_s51604
1070	mf105_rep_c1071	mf105_s54681
1071	mf105_rep_c1072	mf105_s65195
1072	mf105_rep_c1073	mf105_s55874	mf105_s63417	mf105_s69921
1073	mf105_rep_c1074	mf105_rep_c7809	mf105_s59178
1074	mf105_rep_c1075	mf105_s70902
1075	mf105_rep_c1076	mf105_rep_c33666	mf105_s53506	mf105_s57065	mf105_s58013	mf105_s76000
1076	mf105_rep_c1077	mf105_s58002
1077	mf105_rep_c1078	mf105_s73936	mf105_s74794
1078	mf105_rep_c1079	mf105_rep_c42534	mf105_s52047	mf105_s59168	mf105_s62046	mf105_s62859
1079	mf105_rep_c1080	mf105_s63383
1080	mf105_rep_c1081	mf105_s45138	mf105_s62187	mf105_s62956	mf105_s66529
1081	mf105_rep_c1082	mf105_rep_c35550	mf105_s48860	mf105_s66217
1082	mf105_rep_c1083	mf105_s57499
1083	mf105_rep_c1084	mf105_s46608	mf105_s62611	mf105_s63459	mf105_s72632
1084	mf105_rep_c1085	mf105_rep_c27766	mf105_s56568
1085	mf105_rep_c1086	mf105_rep_c9392	mf105_rep_c35589	mf105_s48922	mf105_s76097
1088	mf105_rep_c1089	mf105_s49353
1093	mf105_rep_c1094	mf105_rep_c28134	mf105_s63641
1094	mf105_rep_c1095	mf105_s67267
1095	mf105_rep_c1096	mf105_rep_c37665	mf105_s55180	mf105_s67115
1096	mf105_rep_c1097	mf105_rep_c12075	mf105_rep_c36926	mf105_s65398	mf105_s74452
1097	mf105_rep_c1098	mf105_s64459
1098	mf105_rep_c1099	mf105_rep_c27610	mf105_s70278
1099	mf105_rep_c1100	mf105_s63600	mf105_s65353
1100	mf105_rep_c1101	mf105_rep_c30935	mf105_rep_c47254	mf105_s50283	mf105_s55235	mf105_s65499
1101	mf105_rep_c1102	mf105_s54084	mf105_s66255	mf105_s72563
1102	mf105_rep_c1103	mf105_rep_c35359	mf105_rep_c46254	mf105_s74525	mf105_s75228
1103	mf105_rep_c1104	mf105_rep_c35725	mf105_s50914	mf105_s59351	mf105_s73612
1104	mf105_rep_c1105	mf105_s74433
1105	mf105_rep_c1106	mf105_rep_c33129	mf105_s59950	mf105_s61743
1106	mf105_rep_c1107	mf105_rep_c17153
1108	mf105_rep_c1109	mf105_rep_c46057	mf105_s67937
1109	mf105_rep_c1110	mf105_s70811	mf105_s75135
1110	mf105_rep_c1111	mf105_rep_c37115	mf105_rep_c42888	mf105_s54228
1111	mf105_rep_c1112	mf105_s48629	mf105_s60514	mf105_s62105	mf105_s75136
1112	mf105_rep_c1113	mf105_s60040
1113	mf105_rep_c1114	mf105_rep_c13714	mf105_rep_c19364	mf105_rep_c25465	mf105_s68648	mf105_s75322
1114	mf105_rep_c1115	mf105_s61651
1115	mf105_rep_c1116	mf105_s37861	mf105_s74100
1116	mf105_rep_c1117	mf105_rep_c27397	mf105_s52027	mf105_s58621
1118	mf105_rep_c1119	mf105_rep_c46895	mf105_s72580	mf105_s75724
1119	mf105_rep_c1120	mf105_s60708	mf105_s69339
1120	mf105_rep_c1121	mf105_s48627
1121	mf105_rep_c1122	mf105_s57744	mf105_s68669
1123	mf105_rep_c1124	mf105_rep_c43465
1124	mf105_rep_c1125	mf105_s58949	mf105_s69860
1125	mf105_rep_c1126	mf105_s72350
1126	mf105_rep_c1127	mf105_s63832
1127	mf105_rep_c1128	mf105_s51596	mf105_s60674	mf105_s62724	mf105_s65578	mf105_s75257
1128	mf105_rep_c1129	mf105_s67550	mf105_s68092	mf105_s72651
1129	mf105_rep_c1130	mf105_s73700
1130	mf105_rep_c1131	mf105_s71440
1131	mf105_rep_c1132	mf105_s60975	mf105_s68727
1132	mf105_rep_c1133	mf105_rep_c24103	mf105_rep_c42983	mf105_s52249	mf105_s54911
1133	mf105_rep_c1134	mf105_s57564	mf105_s65446	mf105_s71609
1134	mf105_rep_c1135	mf105_s65004	mf105_s66416	mf105_s74888
1135	mf105_rep_c1136	mf105_rep_c38350	mf105_s57245
1136	mf105_rep_c1137	mf105_s50157
1137	mf105_rep_c1138	mf105_s51256
1138	mf105_rep_c1139	mf105_s52537	mf105_s56459
1139	mf105_rep_c1140	mf105_s61463	mf105_s73475
1140	mf105_rep_c1141	mf105_s74225
1141	mf105_rep_c1142	mf105_s69057
1142	mf105_rep_c1143	mf105_rep_c48876	mf105_s56795	mf105_s57038	mf105_s58465	mf105_s74458
1144	mf105_rep_c1145	mf105_rep_c24749	mf105_rep_c28654	mf105_s62554	mf105_s65264
1145	mf105_rep_c1146	mf105_s56943
1146	mf105_rep_c1147	mf105_c32478	mf105_rep_c41684	mf105_s58794	mf105_s73878
1147	mf105_rep_c1148	mf105_c44369	mf105_s51517	mf105_s68788
1150	mf105_rep_c1151	mf105_s66393
1151	mf105_rep_c1152	mf105_s75774
1152	mf105_rep_c1153	mf105_s55286	mf105_s59614	mf105_s63695	mf105_s63896	mf105_s64258
1153	mf105_rep_c1154	mf105_s68521
1154	mf105_rep_c1155	mf105_rep_c32210	mf105_s55662	mf105_s64335
1155	mf105_rep_c1156	mf105_rep_c40469	mf105_rep_c47587	mf105_s51024	mf105_s57828	mf105_s58394	mf105_s59301	mf105_s62693
1156	mf105_rep_c1157	mf105_s59382
1158	mf105_rep_c1159	mf105_rep_c46317	mf105_s50029
1160	mf105_rep_c1161	mf105_rep_c23768	mf105_rep_c31508	mf105_s54062
1161	mf105_rep_c1162	mf105_s59433
1162	mf105_rep_c1163	mf105_s66956	mf105_s70065	mf105_s74629
1163	mf105_rep_c1164	mf105_s55762	mf105_s61987	mf105_s64572	mf105_s66068
1164	mf105_rep_c1165	mf105_s51178	mf105_s66027
1165	mf105_rep_c1166	mf105_s53570	mf105_s60085	mf105_s62938	mf105_s76203
1166	mf105_rep_c1167	mf105_s50896
1167	mf105_rep_c1168	mf105_rep_c35287
1168	mf105_rep_c1169	mf105_rep_c11002	mf105_c43316	mf105_s53453
1169	mf105_rep_c1170	mf105_s58719	mf105_s58768	mf105_s68300
1170	mf105_rep_c1171	mf105_rep_c42682
1171	mf105_rep_c1172	mf105_c43427	mf105_s65986
1172	mf105_rep_c1173	mf105_s49525	mf105_s63119
1173	mf105_rep_c1174	mf105_rep_c26225	mf105_rep_c43388	mf105_rep_c46087	mf105_s57830	mf105_s57932	mf105_s74761
1174	mf105_rep_c1175	mf105_s66974
1175	mf105_rep_c1176	mf105_s66847	mf105_s69832
1176	mf105_rep_c1177	mf105_s57712
1177	mf105_rep_c1178	mf105_rep_c38710	mf105_s56576
1178	mf105_rep_c1179	mf105_rep_c11512
1179	mf105_rep_c1180	mf105_rep_c37002	mf105_s70213
1181	mf105_rep_c1182	mf105_rep_c6677	mf105_rep_c11591	mf105_rep_c49758	mf105_s56218	mf105_s75953
1182	mf105_rep_c1183	mf105_s68794
1183	mf105_rep_c1184	mf105_s69240
1185	mf105_rep_c1186	mf105_s50925	mf105_s52651	mf105_s53836
1186	mf105_rep_c1187	mf105_s58963	mf105_s67311
1187	mf105_rep_c1188	mf105_s57955
1188	mf105_rep_c1189	mf105_rep_c28092	mf105_s51779	mf105_s71416
1189	mf105_rep_c1190	mf105_rep_c35233
1191	mf105_rep_c1192	mf105_s50989	mf105_s58624	mf105_s65265
1192	mf105_rep_c1193	mf105_s57473	mf105_s74595
1193	mf105_rep_c1194	mf105_s72215
1195	mf105_rep_c1196	mf105_rep_c36743	mf105_s58858
1196	mf105_rep_c1197	mf105_s53779
1198	mf105_rep_c1199	mf105_rep_c5740	mf105_rep_c49179	mf105_s52889	mf105_s59670	mf105_s66646
1199	mf105_rep_c1200	mf105_s69277
1201	mf105_rep_c1202	mf105_s61328
1202	mf105_rep_c1203	mf105_c27613	mf105_s57614
1203	mf105_rep_c1204	mf105_s59188	mf105_s71629
1205	mf105_rep_c1206	mf105_rep_c22769	mf105_s71169
1206	mf105_rep_c1207	mf105_s64613	mf105_s68303	mf105_s74353
1208	mf105_rep_c1209	mf105_s57569	mf105_s57833	mf105_s63082	mf105_s69297
1209	mf105_rep_c1210	mf105_s58937
1210	mf105_rep_c1211	mf105_s72706
1212	mf105_rep_c1213	mf105_s63171	mf105_s64700
1213	mf105_rep_c1214	mf105_rep_c44916	mf105_s59818
1214	mf105_rep_c1215	mf105_s57583	mf105_s66274
1215	mf105_rep_c1216	mf105_rep_c37929	mf105_s65755	mf105_s73904
1216	mf105_rep_c1217	mf105_rep_c18836	mf105_s61510	mf105_s62345
1217	mf105_rep_c1218	mf105_s55646	mf105_s66860
1218	mf105_rep_c1219	mf105_rep_c22798	mf105_rep_c39160	mf105_s75111
1219	mf105_rep_c1220	mf105_s55630	mf105_s63461
1220	mf105_rep_c1221	mf105_s50685
1221	mf105_rep_c1222	mf105_s58322	mf105_s69937
1222	mf105_rep_c1223	mf105_rep_c30811
1223	mf105_rep_c1224	mf105_rep_c42861	mf105_s49772	mf105_s50454	mf105_s63052
1225	mf105_rep_c1226	mf105_rep_c28258	mf105_s73593
1227	mf105_rep_c1228	mf105_rep_c42946	mf105_rep_c50198	mf105_s70533
1228	mf105_rep_c1229	mf105_s65206
1229	mf105_rep_c1230	mf105_rep_c40803	mf105_s74283	mf105_s76107
1230	mf105_rep_c1231	mf105_rep_c47187
1231	mf105_rep_c1232	mf105_s73837
1233	mf105_rep_c1234	mf105_s56261
1234	mf105_rep_c1235	mf105_s62387	mf105_s70463
1235	mf105_rep_c1236	mf105_rep_c31820	mf105_s48345	mf105_s49904	mf105_s50893
1236	mf105_rep_c1237	mf105_s66015
1237	mf105_rep_c1238	mf105_rep_c38351	mf105_s46406	mf105_s75312
1238	mf105_rep_c1239	mf105_rep_c44711	mf105_s64113	mf105_s67733
1239	mf105_rep_c1240	mf105_rep_c5634
1240	mf105_rep_c1241	mf105_s72317
1241	mf105_rep_c1242	mf105_rep_c22720	mf105_rep_c30741	mf105_rep_c43559	mf105_s65359	mf105_s75407
1242	mf105_rep_c1243	mf105_rep_c38785	mf105_s64521
1243	mf105_rep_c1244	mf105_rep_c40148	mf105_s53856	mf105_s66044
1244	mf105_rep_c1245	mf105_s48564	mf105_s53270
1245	mf105_rep_c1246	mf105_s52881	mf105_s54227
1248	mf105_rep_c1249	mf105_s59366	mf105_s69299
1249	mf105_rep_c1250	mf105_rep_c30121	mf105_rep_c34634
1250	mf105_rep_c1251	mf105_s73246
1253	mf105_rep_c1254	mf105_s52587
1255	mf105_rep_c1256	mf105_c47601	mf105_s57941
1256	mf105_rep_c1257	mf105_c44533	mf105_s68559
1257	mf105_rep_c1258	mf105_s61654	mf105_s67525
1258	mf105_rep_c1259	mf105_rep_c33649	mf105_s69740	mf105_s70037	mf105_s72141
1259	mf105_rep_c1260	mf105_rep_c22788	mf105_s67850
1261	mf105_rep_c1262	mf105_s59316
1262	mf105_rep_c1263	mf105_s58228	mf105_s68465
1263	mf105_rep_c1264	mf105_rep_c46629	mf105_s52857	mf105_s69432
1264	mf105_rep_c1265	mf105_rep_c15129	mf105_rep_c37997	mf105_rep_c52253	mf105_s65003	mf105_s71155
1265	mf105_rep_c1266	mf105_c47217	mf105_s59292
1266	mf105_rep_c1267	mf105_s49977	mf105_s73481
1269	mf105_rep_c1270	mf105_s51154	mf105_s64711	mf105_s67060
1271	mf105_rep_c1272	mf105_rep_c31295	mf105_s54429	mf105_s57453	mf105_s67856
1272	mf105_rep_c1273	mf105_s65211	mf105_s68538	mf105_s71244
1273	mf105_rep_c1274	mf105_s59901
1274	mf105_rep_c1275	mf105_s65981
1275	mf105_rep_c1276	mf105_s53871	mf105_s54098	mf105_s58910	mf105_s61615	mf105_s67149
1277	mf105_rep_c1278	mf105_s63495	mf105_s67616
1278	mf105_rep_c1279	mf105_s51702	mf105_s63878
1279	mf105_rep_c1280	mf105_rep_c42719
1280	mf105_rep_c1281	mf105_s67200	mf105_s67315	mf105_s74820
1282	mf105_rep_c1283	mf105_rep_c17923	mf105_rep_c46745
1283	mf105_rep_c1284	mf105_rep_c45157	mf105_s71123
1284	mf105_rep_c1285	mf105_s67762
1285	mf105_rep_c1286	mf105_s48384	mf105_s64660	mf105_s68097
1286	mf105_rep_c1287	mf105_s50431	mf105_s73025
1287	mf105_rep_c1288	mf105_s48965	mf105_s65733	mf105_s73161
1288	mf105_rep_c1289	mf105_s68205
1289	mf105_rep_c1290	mf105_s59037	mf105_s60639	mf105_s63974
1290	mf105_rep_c1291	mf105_rep_c42274	mf105_rep_c49970
1291	mf105_rep_c1292	mf105_rep_c46700	mf105_rep_c47025	mf105_s58432	mf105_s75814
1292	mf105_rep_c1293	mf105_s60165	mf105_s67159	mf105_s67853
1295	mf105_rep_c1296	mf105_rep_c21761	mf105_s55473	mf105_s75134
1296	mf105_rep_c1297	mf105_s58316	mf105_s74243	mf105_s75231
1297	mf105_rep_c1298	mf105_s70073	mf105_s71449
1298	mf105_rep_c1299	mf105_s49112	mf105_s60163
1299	mf105_rep_c1300	mf105_s59991
1300	mf105_rep_c1301	mf105_s73735
1301	mf105_rep_c1302	mf105_rep_c16285	mf105_s67896
1302	mf105_rep_c1303	mf105_s67650
1303	mf105_rep_c1304	mf105_rep_c5728	mf105_rep_c7427	mf105_s65084	mf105_s69952
1304	mf105_rep_c1305	mf105_s67567
1305	mf105_rep_c1306	mf105_rep_c28618	mf105_s67362
1306	mf105_rep_c1307	mf105_s75936
1307	mf105_rep_c1308	mf105_s48775
1308	mf105_rep_c1309	mf105_s50182	mf105_s71054
1309	mf105_rep_c1310	mf105_s60713	mf105_s64765
1310	mf105_rep_c1311	mf105_rep_c8899	mf105_rep_c34666	mf105_rep_c35751	mf105_s61415	mf105_s62071	mf105_s69077
1311	mf105_rep_c1312	mf105_rep_c32985	mf105_c45575	mf105_s49730	mf105_s57498	mf105_s74025
1312	mf105_rep_c1313	mf105_s58103	mf105_s64685
1313	mf105_rep_c1314	mf105_rep_c28997	mf105_s61407	mf105_s69540
1314	mf105_rep_c1315	mf105_rep_c12411	mf105_rep_c21034	mf105_rep_c43204	mf105_s53261	mf105_s53411	mf105_s59042	mf105_s59073
1315	mf105_rep_c1316	mf105_s59504
1316	mf105_rep_c1317	mf105_s72656
1317	mf105_rep_c1318	mf105_rep_c32462	mf105_rep_c45790	mf105_s60455	mf105_s73640
1318	mf105_rep_c1319	mf105_s50383	mf105_s58845
1319	mf105_rep_c1320	mf105_s49032	mf105_s51366	mf105_s54391	mf105_s66320	mf105_s73564
1320	mf105_rep_c1321	mf105_s58656
1321	mf105_rep_c1322	mf105_rep_c30212	mf105_s57817	mf105_s59347	mf105_s60456	mf105_s73930
1322	mf105_rep_c1323	mf105_rep_c46795	mf105_s74223
1323	mf105_rep_c1324	mf105_rep_c28238	mf105_s51552	mf105_s62602	mf105_s69322	mf105_s72635
1324	mf105_rep_c1325	mf105_s55876
1325	mf105_rep_c1326	mf105_rep_c34366	mf105_s72206
1326	mf105_rep_c1327	mf105_s72339
1327	mf105_rep_c1328	mf105_rep_c48612	mf105_s58469	mf105_s70237	mf105_s71507
1328	mf105_rep_c1329	mf105_s57912	mf105_s69205
1329	mf105_rep_c1330	mf105_s66735
1331	mf105_rep_c1332	mf105_s64654
1333	mf105_rep_c1334	mf105_rep_c9528	mf105_rep_c13748	mf105_s56475	mf105_s73120
1334	mf105_rep_c1335	mf105_rep_c15758	mf105_rep_c23970	mf105_s53846	mf105_s67378
1335	mf105_rep_c1336	mf105_rep_c44452
1336	mf105_rep_c1337	mf105_rep_c19377	mf105_s48435	mf105_s68670
1337	mf105_rep_c1338	mf105_rep_c26612
1338	mf105_rep_c1339	mf105_s48431	mf105_s69095
1339	mf105_rep_c1340	mf105_s65830
1340	mf105_rep_c1341	mf105_s56157	mf105_s73719
1341	mf105_rep_c1342	mf105_s73615
1342	mf105_rep_c1343	mf105_rep_c30305	mf105_rep_c42282	mf105_s71967
1343	mf105_rep_c1344	mf105_rep_c44025	mf105_s53310	mf105_s57015
1344	mf105_rep_c1345	mf105_rep_c36311	mf105_c39836	mf105_s64300
1345	mf105_rep_c1346	mf105_rep_c49038
1346	mf105_rep_c1347	mf105_s65079	mf105_s67049	mf105_s71896
1347	mf105_rep_c1348	mf105_s50811
1348	mf105_rep_c1349	mf105_s59807	mf105_s65409	mf105_s73782
1349	mf105_rep_c1350	mf105_s55960	mf105_s63764	mf105_s64080
1350	mf105_rep_c1351	mf105_s58535	mf105_s59663
1351	mf105_rep_c1352	mf105_s63166	mf105_s68709	mf105_s71916
1352	mf105_rep_c1353	mf105_rep_c41939	mf105_s68809
1353	mf105_rep_c1354	mf105_c40501	mf105_s48677	mf105_s49638	mf105_s61339	mf105_s63965	mf105_s68446	mf105_s74920
1354	mf105_rep_c1355	mf105_rep_c44771	mf105_s51603	mf105_s65093	mf105_s65944
1355	mf105_rep_c1356	mf105_s54696	mf105_s65984	mf105_s73542
1356	mf105_rep_c1357	mf105_rep_c19693	mf105_s56871	mf105_s74305
1357	mf105_rep_c1358	mf105_s61012
1358	mf105_rep_c1359	mf105_s71979
1359	mf105_rep_c1360	mf105_s56935	mf105_s66150	mf105_s74306
1360	mf105_rep_c1361	mf105_rep_c18868	mf105_rep_c34265	mf105_rep_c47155	mf105_s60524	mf105_s61959
1361	mf105_rep_c1362	mf105_rep_c46600	mf105_s68043	mf105_s72377
1362	mf105_rep_c1363	mf105_rep_c18606	mf105_s56818
1363	mf105_rep_c1364	mf105_s55064
1364	mf105_rep_c1365	mf105_s58318
1365	mf105_rep_c1366	mf105_rep_c7231	mf105_s68140
1366	mf105_rep_c1367	mf105_s68449
1367	mf105_rep_c1368	mf105_rep_c35327	mf105_s51891
1368	mf105_rep_c1369	mf105_s73958	mf105_s75886
1369	mf105_rep_c1370	mf105_s58903	mf105_s71269
1370	mf105_rep_c1371	mf105_rep_c34949
1371	mf105_rep_c1372	mf105_rep_c24917	mf105_s67954
1372	mf105_rep_c1373	mf105_s50327	mf105_s59027
1373	mf105_rep_c1374	mf105_rep_c45833	mf105_s76214
1374	mf105_rep_c1375	mf105_rep_c20868
1375	mf105_rep_c1376	mf105_s72528
1376	mf105_rep_c1377	mf105_s59323
1377	mf105_rep_c1378	mf105_s71373
1378	mf105_rep_c1379	mf105_s50497
1379	mf105_rep_c1380	mf105_rep_c24751	mf105_s50511	mf105_s64316
1380	mf105_rep_c1381	mf105_rep_c32890	mf105_s54631	mf105_s62837	mf105_s63667	mf105_s69604
1381	mf105_rep_c1382	mf105_s63305	mf105_s66957
1382	mf105_rep_c1383	mf105_s53565	mf105_s73383
1383	mf105_rep_c1384	mf105_rep_c37722
1384	mf105_rep_c1385	mf105_s63451	mf105_s64437
1385	mf105_rep_c1386	mf105_s54648
1386	mf105_rep_c1387	mf105_rep_c44126	mf105_s63791	mf105_s71877
1387	mf105_rep_c1388	mf105_rep_c39062	mf105_s51837
1388	mf105_rep_c1389	mf105_rep_c18544	mf105_s52908	mf105_s73365
1389	mf105_rep_c1390	mf105_s49053	mf105_s72381	mf105_s74985
1390	mf105_rep_c1391	mf105_s55590	mf105_s71459	mf105_s76256
1391	mf105_rep_c1392	mf105_s50248	mf105_s51426	mf105_s66011	mf105_s76077
1392	mf105_rep_c1393	mf105_rep_c24915	mf105_rep_c36900	mf105_s56858	mf105_s62487
1393	mf105_rep_c1394	mf105_rep_c41675	mf105_rep_c45751	mf105_s55980	mf105_s62023
1394	mf105_rep_c1395	mf105_rep_c26729	mf105_s75052
1395	mf105_rep_c1396	mf105_rep_c36613	mf105_rep_c37921
1396	mf105_rep_c1397	mf105_s57215	mf105_s63539	mf105_s75832
1397	mf105_rep_c1398	mf105_rep_c15115	mf105_s54156
1398	mf105_rep_c1399	mf105_rep_c43630	mf105_s54826
1399	mf105_rep_c1400	mf105_s52772
1401	mf105_rep_c1402	mf105_s52543	mf105_s71661
1402	mf105_rep_c1403	mf105_rep_c40007	mf105_s67826
1403	mf105_rep_c1404	mf105_rep_c27710	mf105_s68580
1405	mf105_rep_c1406	mf105_rep_c21803	mf105_s56434	mf105_s67540	mf105_s71909
1406	mf105_rep_c1407	mf105_rep_c47988
1408	mf105_rep_c1409	mf105_s59786
1409	mf105_rep_c1410	mf105_s56398
1410	mf105_rep_c1411	mf105_c47409	mf105_s49331	mf105_s64263
1411	mf105_rep_c1412	mf105_s54491	mf105_s58623
1412	mf105_rep_c1413	mf105_s66029	mf105_s68063
1413	mf105_rep_c1414	mf105_rep_c47390	mf105_s69087
1414	mf105_rep_c1415	mf105_rep_c42326
1415	mf105_rep_c1416	mf105_rep_c36572	mf105_rep_c39443	mf105_s60376
1416	mf105_rep_c1417	mf105_s55857	mf105_s67925
1420	mf105_rep_c1421	mf105_rep_c37138	mf105_rep_c49453	mf105_s55520	mf105_s59576	mf105_s62198	mf105_s64127
1421	mf105_rep_c1422	mf105_s50808
1424	mf105_rep_c1425	mf105_c47994	mf105_s54480
1425	mf105_rep_c1426	mf105_s75001
1426	mf105_rep_c1427	mf105_s52102
1427	mf105_rep_c1428	mf105_s65788	mf105_s67557
1428	mf105_rep_c1429	mf105_rep_c12131	mf105_s50974	mf105_s74310
1429	mf105_rep_c1430	mf105_s68810
1430	mf105_rep_c1431	mf105_s52584	mf105_s74031	mf105_s76115
1431	mf105_rep_c1432	mf105_s65997
1432	mf105_rep_c1433	mf105_s64881
1433	mf105_rep_c1434	mf105_rep_c43892
1434	mf105_rep_c1435	mf105_s48511	mf105_s59939	mf105_s63120
1435	mf105_rep_c1436	mf105_rep_c4978	mf105_rep_c32439	mf105_s52173
1437	mf105_rep_c1438	mf105_s76172
1439	mf105_rep_c1440	mf105_s61623	mf105_s76262
1440	mf105_rep_c1441	mf105_rep_c36570	mf105_s51437	mf105_s62450
1441	mf105_rep_c1442	mf105_s50577
1442	mf105_rep_c1443	mf105_s50233	mf105_s59121
1443	mf105_rep_c1444	mf105_s57699	mf105_s58859	mf105_s66245	mf105_s67605
1444	mf105_rep_c1445	mf105_s59749	mf105_s62442
1445	mf105_rep_c1446	mf105_c44720	mf105_s71950
1450	mf105_rep_c1451	mf105_rep_c10216	mf105_s74707
1452	mf105_rep_c1453	mf105_s63160	mf105_s66599
1453	mf105_rep_c1454	mf105_rep_c28471	mf105_rep_c31748	mf105_rep_c37487	mf105_s52472	mf105_s58324	mf105_s60216
1454	mf105_rep_c1455	mf105_rep_c22929	mf105_s57879	mf105_s76126
1455	mf105_rep_c1456	mf105_rep_c42228
1457	mf105_rep_c1458	mf105_s57595	mf105_s62120
1458	mf105_rep_c1459	mf105_rep_c30573
1459	mf105_rep_c1460	mf105_rep_c48245
1461	mf105_rep_c1462	mf105_rep_c28908
1463	mf105_rep_c1464	mf105_rep_c35972	mf105_s51700	mf105_s57504
1464	mf105_rep_c1465	mf105_rep_c29141
1465	mf105_rep_c1466	mf105_s53731	mf105_s57893	mf105_s59012
1466	mf105_rep_c1467	mf105_s59083	mf105_s74140
1467	mf105_rep_c1468	mf105_s48807	mf105_s53597	mf105_s65999	mf105_s70456
1468	mf105_rep_c1469	mf105_s73288
1469	mf105_rep_c1470	mf105_rep_c41567
1471	mf105_rep_c1472	mf105_rep_c23476	mf105_s51631	mf105_s57199	mf105_s69516	mf105_s70552	mf105_s76215
1472	mf105_rep_c1473	mf105_s48801
1473	mf105_rep_c1474	mf105_s68937	mf105_s73800
1475	mf105_rep_c1476	mf105_s52169	mf105_s66523
1476	mf105_rep_c1477	mf105_s56557	mf105_s67927
1478	mf105_rep_c1479	mf105_s66645
1479	mf105_rep_c1480	mf105_s45177	mf105_s51593	mf105_s52701	mf105_s62655
1480	mf105_rep_c1481	mf105_s60198	mf105_s67189	mf105_s73565
1482	mf105_rep_c1483	mf105_rep_c47870	mf105_s51223	mf105_s57133	mf105_s58835	mf105_s61555	mf105_s70133
1483	mf105_rep_c1484	mf105_rep_c42810	mf105_s51433
1485	mf105_rep_c1486	mf105_rep_c47565	mf105_s57714
1486	mf105_rep_c1487	mf105_c27594	mf105_rep_c48006
1487	mf105_rep_c1488	mf105_rep_c27436	mf105_rep_c39375
1488	mf105_rep_c1489	mf105_s48725	mf105_s57274	mf105_s75501
1489	mf105_rep_c1490	mf105_rep_c28480	mf105_rep_c44732	mf105_s70652	mf105_s74878
1490	mf105_rep_c1491	mf105_rep_c28397
1492	mf105_rep_c1493	mf105_s51660
1493	mf105_rep_c1494	mf105_rep_c10087	mf105_s54155	mf105_s74955
1494	mf105_rep_c1495	mf105_s64775
1495	mf105_rep_c1496	mf105_rep_c24084	mf105_rep_c32837	mf105_s57424	mf105_s69171	mf105_s70667
1496	mf105_rep_c1497	mf105_s63894	mf105_s68988
1497	mf105_rep_c1498	mf105_s51920	mf105_s76130
1498	mf105_rep_c1499	mf105_s63756	mf105_s67478
1500	mf105_rep_c1501	mf105_s52064	mf105_s59099	mf105_s64706
1501	mf105_rep_c1502	mf105_rep_c22438	mf105_s51392
1502	mf105_rep_c1503	mf105_s55396
1503	mf105_rep_c1504	mf105_rep_c22809	mf105_s69737	mf105_s72344
1504	mf105_rep_c1505	mf105_rep_c37157	mf105_rep_c43795	mf105_s52689	mf105_s56803	mf105_s67708	mf105_s74227
1505	mf105_rep_c1506	mf105_rep_c40850	mf105_s72702
1506	mf105_rep_c1507	mf105_s55850
1507	mf105_rep_c1508	mf105_s60058
1508	mf105_rep_c1509	mf105_rep_c17821	mf105_rep_c36439
1509	mf105_rep_c1510	mf105_s67808
1510	mf105_rep_c1511	mf105_rep_c6084	mf105_rep_c54124	mf105_s56109	mf105_s56932	mf105_s73882
1511	mf105_rep_c1512	mf105_s52326	mf105_s68144
1512	mf105_rep_c1513	mf105_s60988
1513	mf105_rep_c1514	mf105_rep_c24660
1514	mf105_rep_c1515	mf105_s73953
1515	mf105_rep_c1516	mf105_s76032
1517	mf105_rep_c1518	mf105_rep_c42118	mf105_s51108	mf105_s68712	mf105_s75035
1518	mf105_rep_c1519	mf105_rep_c38006	mf105_s54247	mf105_s67524
1519	mf105_rep_c1520	mf105_rep_c52770	mf105_s60067
1521	mf105_rep_c1522	mf105_s53873
1522	mf105_rep_c1523	mf105_rep_c7896
1524	mf105_rep_c1525	mf105_s51996	mf105_s60987	mf105_s65414
1525	mf105_rep_c1526	mf105_rep_c41750	mf105_rep_c55335	mf105_s60347
1526	mf105_rep_c1527	mf105_rep_c11245	mf105_rep_c32467	mf105_rep_c40607	mf105_s51157	mf105_rep_c53830	mf105_s54916	mf105_s61006	mf105_s62847	mf105_s62875	mf105_s65425	mf105_rep_c70812
1527	mf105_rep_c1528	mf105_rep_c10124	mf105_s53589
1528	mf105_rep_c1529	mf105_rep_c44588	mf105_s63946	mf105_s69681
1530	mf105_rep_c1531	mf105_rep_c36220	mf105_s65914	mf105_s72889
1531	mf105_rep_c1532	mf105_s49751	mf105_s61195	mf105_s61596	mf105_s70764
1532	mf105_rep_c1533	mf105_rep_c27976	mf105_s49661
1533	mf105_rep_c1534	mf105_s64843
1534	mf105_rep_c1535	mf105_s63196
1535	mf105_rep_c1536	mf105_s59990	mf105_s72276
1536	mf105_rep_c1537	mf105_s48723	mf105_s52524	mf105_s64515
1537	mf105_rep_c1538	mf105_s68058
1539	mf105_rep_c1540	mf105_rep_c42404	mf105_s56709	mf105_s70425
1541	mf105_rep_c1542	mf105_s66839	mf105_s73485
1543	mf105_rep_c1544	mf105_rep_c24276	mf105_s49102
1544	mf105_rep_c1545	mf105_s51269
1545	mf105_rep_c1546	mf105_rep_c36244	mf105_s68808	mf105_s72501
1546	mf105_rep_c1547	mf105_s50537	mf105_s66104	mf105_s75039
1547	mf105_rep_c1548	mf105_rep_c40555	mf105_s59699	mf105_s68454
1548	mf105_rep_c1549	mf105_rep_c34283	mf105_s52713	mf105_s53190	mf105_s55179	mf105_s59976	mf105_s64007	mf105_s72391
1551	mf105_rep_c1552	mf105_s50860
1552	mf105_rep_c1553	mf105_rep_c40933	mf105_s60363	mf105_s62005
1553	mf105_rep_c1554	mf105_c47790	mf105_s50839
1554	mf105_rep_c1555	mf105_s58888	mf105_s69486
1555	mf105_rep_c1556	mf105_s73373
1556	mf105_rep_c1557	mf105_s62925	mf105_s64927	mf105_s69403
1557	mf105_rep_c1558	mf105_s56904	mf105_s57063	mf105_s68815	mf105_s69971
1558	mf105_rep_c1559	mf105_s49641	mf105_s62237
1559	mf105_rep_c1560	mf105_s52632	mf105_s58504	mf105_s69061
1560	mf105_rep_c1561	mf105_s56171	mf105_s62578	mf105_s64157
1561	mf105_rep_c1562	mf105_s51411	mf105_s59617
1564	mf105_rep_c1565	mf105_rep_c8970	mf105_rep_c53286	mf105_s61727
1565	mf105_rep_c1566	mf105_rep_c34563
1566	mf105_rep_c1567	mf105_rep_c24175	mf105_s52141	mf105_s58792	mf105_s61048
1567	mf105_rep_c1568	mf105_s56044	mf105_s70043	mf105_s74044
1568	mf105_rep_c1569	mf105_rep_c22090	mf105_s57573
1569	mf105_rep_c1570	mf105_s57597	mf105_s63875
1570	mf105_rep_c1571	mf105_s54211	mf105_s58737	mf105_s59341	mf105_s73570
1571	mf105_rep_c1572	mf105_s71824
1572	mf105_rep_c1573	mf105_s64778	mf105_s72127	mf105_s74762	mf105_s76175
1573	mf105_rep_c1574	mf105_s61401
1574	mf105_rep_c1575	mf105_s59844
1575	mf105_rep_c1576	mf105_rep_c45329
1576	mf105_rep_c1577	mf105_s63089
1577	mf105_rep_c1578	mf105_rep_c40917	mf105_s70904
1578	mf105_rep_c1579	mf105_s62927
1579	mf105_rep_c1580	mf105_s69550
1580	mf105_rep_c1581	mf105_rep_c30053
1581	mf105_rep_c1582	mf105_c46595
1582	mf105_rep_c1583	mf105_s52886	mf105_s56208	mf105_s73200
1583	mf105_rep_c1584	mf105_s65385	mf105_s70130
1584	mf105_rep_c1585	mf105_s59444	mf105_s65867
1586	mf105_rep_c1587	mf105_rep_c44090	mf105_s64013	mf105_s68619
1587	mf105_rep_c1588	mf105_rep_c44279	mf105_rep_c46312	mf105_rep_c47190
1589	mf105_rep_c1590	mf105_rep_c38972
1590	mf105_rep_c1591	mf105_s55307	mf105_s70301	mf105_s72597
1592	mf105_rep_c1593	mf105_s69525
1593	mf105_rep_c1594	mf105_rep_c22405	mf105_rep_c43641	mf105_s48493	mf105_s57559	mf105_s64153
1594	mf105_rep_c1595	mf105_s57151
1596	mf105_rep_c1597	mf105_s59058
1597	mf105_rep_c1598	mf105_s55983	mf105_s61018	mf105_s64858	mf105_s72408
1599	mf105_rep_c1600	mf105_s64987	mf105_s66088
1600	mf105_rep_c1601	mf105_rep_c27131	mf105_rep_c41988	mf105_s70941
1601	mf105_rep_c1602	mf105_rep_c42394	mf105_rep_c43214	mf105_s50006	mf105_s59577	mf105_s67695
1602	mf105_rep_c1603	mf105_s52515
1603	mf105_rep_c1604	mf105_s56159	mf105_s68102	mf105_s73155
1604	mf105_rep_c1605	mf105_s60490	mf105_s63413
1605	mf105_rep_c1606	mf105_rep_c39872	mf105_s62656
1606	mf105_rep_c1607	mf105_s71996
1607	mf105_rep_c1608	mf105_s70785	mf105_s73535
1610	mf105_rep_c1611	mf105_s45693	mf105_s68101	mf105_s68438
1611	mf105_rep_c1612	mf105_s49969
1612	mf105_rep_c1613	mf105_rep_c48341	mf105_s63588
1613	mf105_rep_c1614	mf105_rep_c17653	mf105_rep_c25050	mf105_rep_c40388
1614	mf105_rep_c1615	mf105_s54150	mf105_s64450
1615	mf105_rep_c1616	mf105_rep_c41636	mf105_s53759	mf105_s60488	mf105_s69020
1617	mf105_rep_c1618	mf105_s68046
1618	mf105_rep_c1619	mf105_s68114	mf105_s73808
1619	mf105_rep_c1620	mf105_rep_c32807	mf105_s60211	mf105_s70243
1620	mf105_rep_c1621	mf105_rep_c36648	mf105_s57652	mf105_s69943
1621	mf105_rep_c1622	mf105_s58259	mf105_s63529
1622	mf105_rep_c1623	mf105_s56608
1623	mf105_rep_c1624	mf105_s62425
1624	mf105_rep_c1625	mf105_rep_c44956
1625	mf105_rep_c1626	mf105_rep_c22201	mf105_rep_c39567	mf105_s55378	mf105_s65694
1626	mf105_rep_c1627	mf105_rep_c38829	mf105_rep_c42122	mf105_s57620
1627	mf105_rep_c1628	mf105_s64489
1628	mf105_rep_c1629	mf105_s72886
1629	mf105_rep_c1630	mf105_rep_c12162	mf105_s64231
1630	mf105_rep_c1631	mf105_rep_c37357	mf105_s48476
1631	mf105_rep_c1632	mf105_s60210
1632	mf105_rep_c1633	mf105_s51043	mf105_s66220	mf105_s66225
1633	mf105_rep_c1634	mf105_s61749	mf105_s72349
1635	mf105_rep_c1636	mf105_s64334
1636	mf105_rep_c1637	mf105_rep_c31679	mf105_c47305	mf105_s51106	mf105_s56341	mf105_s75439
1637	mf105_rep_c1638	mf105_rep_c13006	mf105_s50231	mf105_s56675	mf105_s56962	mf105_s71104
1639	mf105_rep_c1640	mf105_s63294
1640	mf105_rep_c1641	mf105_s52735
1641	mf105_rep_c1642	mf105_s48855	mf105_s56169
1642	mf105_rep_c1643	mf105_rep_c46004	mf105_s66926	mf105_s74854
1644	mf105_rep_c1645	mf105_rep_c30977	mf105_s58021	mf105_s63126	mf105_s70814	mf105_s71564
1645	mf105_rep_c1646	mf105_rep_c44746	mf105_s50479
1648	mf105_rep_c1649	mf105_rep_c44172	mf105_s58658
1649	mf105_rep_c1650	mf105_rep_c30980
1650	mf105_rep_c1651	mf105_rep_c19642	mf105_s70414
1651	mf105_rep_c1652	mf105_rep_c46238	mf105_s53672	mf105_s55418	mf105_s76264
1652	mf105_rep_c1653	mf105_s58292	mf105_s68563
1653	mf105_rep_c1654	mf105_rep_c40916
1654	mf105_rep_c1655	mf105_s66837
1655	mf105_rep_c1656	mf105_rep_c43391	mf105_s70099
1656	mf105_rep_c1657	mf105_rep_c38277	mf105_s70607
1658	mf105_rep_c1659	mf105_rep_c35739	mf105_rep_c40406	mf105_rep_c41355	mf105_s45901	mf105_s53272	mf105_s66752
1659	mf105_rep_c1660	mf105_s64387	mf105_s68325	mf105_s73408
1660	mf105_rep_c1661	mf105_s56723
1662	mf105_rep_c1663	mf105_rep_c36739	mf105_s50945	mf105_s72113
1663	mf105_rep_c1664	mf105_rep_c23382	mf105_rep_c30755	mf105_s65292
1664	mf105_rep_c1665	mf105_s54112
1665	mf105_rep_c1666	mf105_c47429
1666	mf105_rep_c1667	mf105_rep_c21614	mf105_rep_c47876	mf105_s60603	mf105_s61086	mf105_s64043	mf105_s73100
1667	mf105_rep_c1668	mf105_s54406
1668	mf105_rep_c1669	mf105_rep_c26835	mf105_s63928
1669	mf105_rep_c1670	mf105_s34558	mf105_s67956	mf105_s71076
1670	mf105_rep_c1671	mf105_rep_c43662	mf105_s71042	mf105_s73946
1671	mf105_rep_c1672	mf105_s49685	mf105_s52849
1672	mf105_rep_c1673	mf105_rep_c43523	mf105_s50297
1674	mf105_rep_c1675	mf105_s48624	mf105_s63099	mf105_s71539	mf105_s74281
1675	mf105_rep_c1676	mf105_s55069	mf105_s69435
1676	mf105_rep_c1677	mf105_s49704	mf105_s74041
1680	mf105_rep_c1681	mf105_s58609
1681	mf105_rep_c1682	mf105_rep_c28344	mf105_s48912	mf105_s66975	mf105_s67914
1683	mf105_rep_c1684	mf105_s75653
1684	mf105_rep_c1685	mf105_s48356	mf105_s52198
1685	mf105_rep_c1686	mf105_rep_c26424
1686	mf105_rep_c1687	mf105_rep_c30704	mf105_rep_c39641	mf105_s65242
1688	mf105_rep_c1689	mf105_s53391	mf105_s54019	mf105_s54776	mf105_s72062	mf105_s74584
1690	mf105_rep_c1691	mf105_s29733	mf105_rep_c47104
1691	mf105_rep_c1692	mf105_s69026	mf105_s75092
1692	mf105_rep_c1693	mf105_c44348	mf105_s66023
1693	mf105_rep_c1694	mf105_rep_c19027
1694	mf105_rep_c1695	mf105_rep_c44397	mf105_s54813	mf105_s72541	mf105_s73798
1697	mf105_rep_c1698	mf105_rep_c33655	mf105_rep_c42797	mf105_s48360	mf105_s62576	mf105_s65527	mf105_s70050	mf105_s75506
1698	mf105_rep_c1699	mf105_rep_c29718	mf105_s48498	mf105_s56478	mf105_s67505
1699	mf105_rep_c1700	mf105_s68065
1700	mf105_rep_c1701	mf105_s54963	mf105_s66117	mf105_s71021
1701	mf105_rep_c1702	mf105_s59565	mf105_s61004
1702	mf105_rep_c1703	mf105_rep_c28559	mf105_s52108	mf105_s59028
1703	mf105_rep_c1704	mf105_rep_c43145	mf105_s65742
1704	mf105_rep_c1705	mf105_s59410	mf105_s60697
1705	mf105_rep_c1706	mf105_s58249	mf105_s66990
1706	mf105_rep_c1707	mf105_rep_c27842	mf105_s52639	mf105_s64109
1707	mf105_rep_c1708	mf105_rep_c22653	mf105_s69632
1708	mf105_rep_c1709	mf105_rep_c26921	mf105_s52938	mf105_s53145	mf105_s57123	mf105_s74367
1709	mf105_rep_c1710	mf105_s53860
1710	mf105_rep_c1711	mf105_rep_c42263
1711	mf105_rep_c1712	mf105_s61927	mf105_s65300
1712	mf105_rep_c1713	mf105_rep_c56110	mf105_s71497
1713	mf105_rep_c1714	mf105_rep_c34536	mf105_s48343
1714	mf105_rep_c1715	mf105_s54642
1715	mf105_rep_c1716	mf105_rep_c47244	mf105_s54175	mf105_s58653	mf105_s58907	mf105_s67457	mf105_s67609	mf105_s75097
1716	mf105_rep_c1717	mf105_s49741	mf105_s57134	mf105_s69660	mf105_s71467	mf105_s74805	mf105_s75041	mf105_s75243
1717	mf105_rep_c1718	mf105_rep_c30242	mf105_s64500	mf105_s73902	mf105_s74477
1719	mf105_rep_c1720	mf105_s54863	mf105_s58580	mf105_s76009
1720	mf105_rep_c1721	mf105_s48650	mf105_s61335	mf105_s62527	mf105_s71565
1721	mf105_rep_c1722	mf105_s52730
1722	mf105_rep_c1723	mf105_rep_c22101	mf105_c37510	mf105_s65720	mf105_s71832
1723	mf105_rep_c1724	mf105_rep_c38369	mf105_s54871	mf105_s65260	mf105_s67840
1724	mf105_rep_c1725	mf105_rep_c44083	mf105_s52518	mf105_s58960
1725	mf105_rep_c1726	mf105_s51581	mf105_s56554
1726	mf105_rep_c1727	mf105_rep_c29481	mf105_s55930	mf105_s73855	mf105_s75010
1727	mf105_rep_c1728	mf105_s55409	mf105_s61649
1728	mf105_rep_c1729	mf105_s53462	mf105_s68762
1729	mf105_rep_c1730	mf105_s59199	mf105_s69188
1730	mf105_rep_c1731	mf105_s65534
1731	mf105_rep_c1732	mf105_s51248
1732	mf105_rep_c1733	mf105_s75626
1733	mf105_rep_c1734	mf105_s52335	mf105_s69972
1734	mf105_rep_c1735	mf105_rep_c39512
1736	mf105_rep_c1737	mf105_s50595	mf105_s69757
1738	mf105_rep_c1739	mf105_rep_c31013	mf105_rep_c47322	mf105_s55915
1739	mf105_rep_c1740	mf105_rep_c49444
1740	mf105_rep_c1741	mf105_s63333
1741	mf105_rep_c1742	mf105_s58258
1742	mf105_rep_c1743	mf105_rep_c9219	mf105_s63476	mf105_s74681
1743	mf105_rep_c1744	mf105_rep_c33360	mf105_s54209
1744	mf105_rep_c1745	mf105_s56212	mf105_s73378
1746	mf105_rep_c1747	mf105_rep_c37358
1747	mf105_rep_c1748	mf105_s54769	mf105_s71889	mf105_s71949
1748	mf105_rep_c1749	mf105_s48592	mf105_s63069	mf105_s68447
1749	mf105_rep_c1750	mf105_rep_c18892	mf105_s54899	mf105_s58099
1750	mf105_rep_c1751	mf105_s71770
1752	mf105_rep_c1753	mf105_rep_c25989
1753	mf105_rep_c1754	mf105_rep_c19316	mf105_rep_c30403
1754	mf105_rep_c1755	mf105_s56138	mf105_s69532	mf105_s74598
1756	mf105_rep_c1757	mf105_s55713	mf105_s65708	mf105_s68484
1757	mf105_rep_c1758	mf105_s55412
1758	mf105_rep_c1759	mf105_s69768
1759	mf105_rep_c1760	mf105_rep_c36386	mf105_s50080	mf105_s63245
1760	mf105_rep_c1761	mf105_rep_c42574	mf105_s50093
1763	mf105_rep_c1764	mf105_rep_c32780	mf105_rep_c41582
1764	mf105_rep_c1765	mf105_rep_c39536
1766	mf105_rep_c1767	mf105_s70883	mf105_s72270
1767	mf105_rep_c1768	mf105_s56974	mf105_s76109
1768	mf105_rep_c1769	mf105_s53575
1769	mf105_rep_c1770	mf105_s52137	mf105_s63809	mf105_s73427
1771	mf105_rep_c1772	mf105_s66701
1772	mf105_rep_c1773	mf105_rep_c23889	mf105_s48538	mf105_s51563	mf105_s54119	mf105_s55207	mf105_s59336	mf105_s60440	mf105_s60527	mf105_s61155	mf105_s66640	mf105_s75160
1773	mf105_rep_c1774	mf105_s61825
1774	mf105_rep_c1775	mf105_rep_c32228	mf105_rep_c38999
1776	mf105_rep_c1777	mf105_rep_c43619	mf105_rep_c45675	mf105_s73732	mf105_s73816
1779	mf105_rep_c1780	mf105_rep_c45431
1780	mf105_rep_c1781	mf105_s52176	mf105_s55032	mf105_s57963	mf105_s73131
1781	mf105_rep_c1782	mf105_s49287	mf105_s54191
1782	mf105_rep_c1783	mf105_s69452
1783	mf105_rep_c1784	mf105_s75002
1784	mf105_rep_c1785	mf105_s62758
1785	mf105_rep_c1786	mf105_s56050	mf105_s74742
1786	mf105_rep_c1787	mf105_rep_c6484
1787	mf105_rep_c1788	mf105_rep_c47113	mf105_s54831	mf105_s63141	mf105_s63466
1788	mf105_rep_c1789	mf105_rep_c18880	mf105_rep_c42802	mf105_s55131	mf105_s72421
1789	mf105_rep_c1790	mf105_s62372	mf105_s63059
1790	mf105_rep_c1791	mf105_s54111
1791	mf105_rep_c1792	mf105_rep_c44117
1792	mf105_rep_c1793	mf105_s56365	mf105_s56652	mf105_s65631	mf105_s72123	mf105_s74276
1793	mf105_rep_c1794	mf105_s69147
1794	mf105_rep_c1795	mf105_s55774	mf105_s59641	mf105_s67343
1795	mf105_rep_c1796	mf105_s62124
1796	mf105_rep_c1797	mf105_s53090
1797	mf105_rep_c1798	mf105_s55816
1798	mf105_rep_c1799	mf105_rep_c28434	mf105_s54347	mf105_s61673
1800	mf105_rep_c1801	mf105_rep_c21209	mf105_s64501	mf105_s72989	mf105_s75806
1801	mf105_rep_c1802	mf105_s58307	mf105_s69377	mf105_s71330
1802	mf105_rep_c1803	mf105_rep_c29624	mf105_rep_c33939	mf105_s61514
1804	mf105_rep_c1805	mf105_s65506	mf105_s68192
1805	mf105_rep_c1806	mf105_s64083	mf105_s66790	mf105_s71488
1806	mf105_rep_c1807	mf105_rep_c36165	mf105_s51879	mf105_s57995
1807	mf105_rep_c1808	mf105_rep_c33747	mf105_s51469	mf105_s65010	mf105_s75226
1808	mf105_rep_c1809	mf105_rep_c43190
1809	mf105_rep_c1810	mf105_s58886	mf105_s61745
1810	mf105_rep_c1811	mf105_rep_c46528	mf105_s64248	mf105_s64877	mf105_s66724
1811	mf105_rep_c1812	mf105_s51605	mf105_s54357
1812	mf105_rep_c1813	mf105_rep_c21328	mf105_s40518	mf105_s66900	mf105_s75148
1814	mf105_rep_c1815	mf105_rep_c44143	mf105_s55411
1815	mf105_rep_c1816	mf105_rep_c20692	mf105_s73031
1816	mf105_rep_c1817	mf105_rep_c47816
1817	mf105_rep_c1818	mf105_s51977	mf105_s57168	mf105_s70749	mf105_s75029
1818	mf105_rep_c1819	mf105_rep_c20912
1819	mf105_rep_c1820	mf105_rep_c49829	mf105_s71528
1821	mf105_rep_c1822	mf105_rep_c47169	mf105_s58104	mf105_s69113
1822	mf105_rep_c1823	mf105_s53862	mf105_s59669	mf105_s74943
1823	mf105_rep_c1824	mf105_s62193
1824	mf105_rep_c1825	mf105_s65046	mf105_s70754
1825	mf105_rep_c1826	mf105_rep_c31628	mf105_s75151
1826	mf105_rep_c1827	mf105_rep_c47989	mf105_s57127	mf105_s64549
1827	mf105_rep_c1828	mf105_s55651
1828	mf105_rep_c1829	mf105_s56656	mf105_s72025
1829	mf105_rep_c1830	mf105_s60405	mf105_s63744	mf105_s65284
1830	mf105_rep_c1831	mf105_rep_c42660	mf105_s49546	mf105_s64473
1831	mf105_rep_c1832	mf105_s50719
1832	mf105_rep_c1833	mf105_rep_c39382
1833	mf105_rep_c1834	mf105_rep_c2030	mf105_rep_c53210	mf105_rep_c64265
1834	mf105_rep_c1835	mf105_s51668	mf105_s55267
1836	mf105_rep_c1837	mf105_rep_c35275
1837	mf105_rep_c1838	mf105_s59332	mf105_s61795
1838	mf105_rep_c1839	mf105_s75152
1839	mf105_rep_c1840	mf105_rep_c31368
1840	mf105_rep_c1841	mf105_s73893
1841	mf105_rep_c1842	mf105_s64556
1843	mf105_rep_c1844	mf105_rep_c26423	mf105_rep_c26668	mf105_c42007	mf105_rep_c45754	mf105_s51373	mf105_s57837	mf105_s62793	mf105_s67369	mf105_s69919	mf105_s72904
1844	mf105_rep_c1845	mf105_rep_c36396	mf105_s57394
1845	mf105_rep_c1846	mf105_s68787	mf105_s69499
1847	mf105_rep_c1848	mf105_s69259
1848	mf105_rep_c1849	mf105_rep_c14808	mf105_rep_c44167	mf105_s48909	mf105_s67430
1849	mf105_rep_c1851	mf105_s56399
1850	mf105_rep_c1852	mf105_s72682
1851	mf105_rep_c1853	mf105_s55924	mf105_s63908
1852	mf105_rep_c1854	mf105_s67363	mf105_s68032
1853	mf105_rep_c1855	mf105_s64307	mf105_s68675
1854	mf105_rep_c1856	mf105_s66087	mf105_s73600
1855	mf105_rep_c1857	mf105_s72779
1856	mf105_rep_c1858	mf105_rep_c9577	mf105_s52179	mf105_s65938	mf105_s72293
1857	mf105_rep_c1859	mf105_rep_c47247	mf105_s61715
1858	mf105_rep_c1860	mf105_rep_c22679	mf105_s60036	mf105_s62017
1860	mf105_rep_c1862	mf105_s53130	mf105_s74208
1861	mf105_rep_c1863	mf105_s50533	mf105_s55085	mf105_s67939
1862	mf105_rep_c1864	mf105_s54962	mf105_s55601
1863	mf105_rep_c1865	mf105_rep_c38969	mf105_s55215	mf105_s56834	mf105_s65081
1864	mf105_rep_c1866	mf105_rep_c33423	mf105_s55794	mf105_s75398
1865	mf105_rep_c1867	mf105_rep_c43338	mf105_s55026	mf105_s60914
1866	mf105_rep_c1868	mf105_s52791	mf105_s56772	mf105_s64102	mf105_s67035
1867	mf105_rep_c1869	mf105_rep_c27801	mf105_s50056	mf105_s65779
1868	mf105_rep_c1870	mf105_s54638
1869	mf105_rep_c1871	mf105_rep_c18212	mf105_s55062	mf105_s61662	mf105_s73710	mf105_s75299
1873	mf105_rep_c1875	mf105_rep_c46707	mf105_s74541
1874	mf105_rep_c1876	mf105_s53257
1875	mf105_rep_c1877	mf105_s68679
1876	mf105_rep_c1878	mf105_s57910	mf105_s71803	mf105_s75070
1879	mf105_rep_c1881	mf105_s49168	mf105_s66181	mf105_s66672
1881	mf105_rep_c1883	mf105_rep_c31579	mf105_rep_c42923	mf105_s58516
1882	mf105_rep_c1884	mf105_rep_c35857	mf105_rep_c63904
1883	mf105_rep_c1885	mf105_s56163	mf105_s61838	mf105_s67756
1884	mf105_rep_c1886	mf105_s49779	mf105_s50866	mf105_s74406
1885	mf105_rep_c1887	mf105_rep_c46691	mf105_s48570	mf105_s60097	mf105_rep_c60286	mf105_s72027
1887	mf105_rep_c1889	mf105_s58016	mf105_s70194
1889	mf105_rep_c1891	mf105_rep_c45888	mf105_s53200
1890	mf105_rep_c1892	mf105_s49938	mf105_s54720	mf105_s71184
1892	mf105_rep_c1894	mf105_rep_c33903	mf105_s58070	mf105_s72258
1893	mf105_rep_c1895	mf105_rep_c33333
1895	mf105_rep_c1897	mf105_s61046	mf105_s68392
1896	mf105_rep_c1898	mf105_s52704	mf105_s62889	mf105_s68526	mf105_s75509
1897	mf105_rep_c1899	mf105_s54536
1898	mf105_rep_c1900	mf105_s63197
1899	mf105_rep_c1901	mf105_rep_c12644	mf105_rep_c25381	mf105_rep_c36564	mf105_rep_c38515	mf105_rep_c40885	mf105_s55691
1900	mf105_rep_c1902	mf105_rep_c18822	mf105_s57610	mf105_s65169
1901	mf105_rep_c1903	mf105_s55250	mf105_s62562	mf105_s72269
1902	mf105_rep_c1904	mf105_rep_c16322	mf105_s50156	mf105_s70397	mf105_s73905
1904	mf105_rep_c1906	mf105_rep_c32232	mf105_rep_c34257	mf105_c34846	mf105_rep_c48191	mf105_s63812
1905	mf105_rep_c1907	mf105_s37186	mf105_s52424	mf105_s68027	mf105_s68822
1906	mf105_rep_c1908	mf105_rep_c43238	mf105_s52423	mf105_s62507
1907	mf105_rep_c1909	mf105_s51944
1908	mf105_rep_c1910	mf105_rep_c34927	mf105_s52759	mf105_s68443	mf105_s72437
1909	mf105_rep_c1911	mf105_rep_c3366	mf105_s65575
1910	mf105_rep_c1912	mf105_rep_c21251
1911	mf105_rep_c1913	mf105_rep_c35948	mf105_s67205
1912	mf105_rep_c1914	mf105_rep_c25519	mf105_s65781	mf105_s75177
1913	mf105_rep_c1915	mf105_s48817	mf105_s51003
1914	mf105_rep_c1916	mf105_s69102
1916	mf105_rep_c1918	mf105_rep_c12660	mf105_rep_c42099	mf105_s49113
1917	mf105_rep_c1919	mf105_s48894	mf105_s49911	mf105_s52844	mf105_s66538
1918	mf105_rep_c1920	mf105_s57101
1919	mf105_rep_c1921	mf105_s56419
1920	mf105_rep_c1922	mf105_s65877	mf105_s73187
1921	mf105_rep_c1923	mf105_s73377
1922	mf105_rep_c1924	mf105_rep_c25079
1923	mf105_rep_c1925	mf105_s73191
1924	mf105_rep_c1926	mf105_s57956
1925	mf105_rep_c1927	mf105_rep_c42595
1926	mf105_rep_c1928	mf105_rep_c39820
1927	mf105_rep_c1929	mf105_s49963	mf105_s50665	mf105_s55923	mf105_s71424	mf105_s73064
1928	mf105_rep_c1930	mf105_s58451
1930	mf105_rep_c1932	mf105_s50996	mf105_s76247
1931	mf105_rep_c1933	mf105_s73838
1932	mf105_rep_c1934	mf105_rep_c41807	mf105_s75078
1933	mf105_rep_c1935	mf105_rep_c5292	mf105_rep_c9878	mf105_rep_c34413	mf105_s66527
1935	mf105_rep_c1937	mf105_s50142	mf105_s70470
1936	mf105_rep_c1938	mf105_s52929
1937	mf105_rep_c1939	mf105_rep_c32516
1938	mf105_rep_c1940	mf105_rep_c30627
1939	mf105_rep_c1941	mf105_rep_c41633	mf105_s61614
1940	mf105_rep_c1942	mf105_rep_c10688	mf105_s60646	mf105_s75841
1941	mf105_rep_c1943	mf105_rep_c38131
1942	mf105_rep_c1944	mf105_s48507	mf105_s58763
1943	mf105_rep_c1945	mf105_rep_c18382	mf105_rep_c33121	mf105_s53542	mf105_s60722
1944	mf105_rep_c1946	mf105_rep_c7088	mf105_s53520	mf105_s58665	mf105_s64639	mf105_s65376
1945	mf105_rep_c1947	mf105_s56912
1946	mf105_rep_c1948	mf105_s59825
1947	mf105_rep_c1949	mf105_s52834	mf105_s74101
1948	mf105_rep_c1950	mf105_s75392
1949	mf105_rep_c1951	mf105_rep_c14424	mf105_rep_c48005	mf105_s51680	mf105_s54031	mf105_s59399	mf105_s60502	mf105_s61185	mf105_s62206
1950	mf105_rep_c1952	mf105_s50359	mf105_s55916	mf105_s57724
1951	mf105_rep_c1953	mf105_s53093
1952	mf105_rep_c1954	mf105_s58573	mf105_s64859
1953	mf105_rep_c1955	mf105_rep_c25712	mf105_rep_c30531	mf105_s73769
1954	mf105_rep_c1956	mf105_rep_c43363	mf105_s50048	mf105_s62917	mf105_s63509
1955	mf105_rep_c1957	mf105_rep_c20961	mf105_s56851	mf105_s63137
1956	mf105_rep_c1959	mf105_s60397	mf105_s61145	mf105_s75417
1957	mf105_rep_c1960	mf105_s57587
1958	mf105_rep_c1961	mf105_rep_c42175	mf105_s65105
1959	mf105_rep_c1962	mf105_rep_c21477
1961	mf105_rep_c1964	mf105_rep_c27505	mf105_s68011
1962	mf105_rep_c1965	mf105_rep_c37534	mf105_s49128	mf105_s74272
1963	mf105_rep_c1966	mf105_rep_c45107	mf105_s50328
1964	mf105_rep_c1967	mf105_c47326
1965	mf105_rep_c1968	mf105_rep_c24517	mf105_rep_c44125
1966	mf105_rep_c1969	mf105_rep_c34633
1967	mf105_rep_c1970	mf105_c42582
1969	mf105_rep_c1972	mf105_rep_c23497	mf105_rep_c33668
1970	mf105_rep_c1973	mf105_s49813	mf105_s51804
1971	mf105_rep_c1974	mf105_s54980	mf105_s59625	mf105_s65196
1974	mf105_rep_c1977	mf105_rep_c51023
1975	mf105_rep_c1978	mf105_rep_c17374	mf105_rep_c38588	mf105_s53353
1977	mf105_rep_c1980	mf105_s70028
1978	mf105_rep_c1981	mf105_s64036
1979	mf105_rep_c1982	mf105_rep_c30970	mf105_rep_c44968
1980	mf105_rep_c1983	mf105_rep_c48040	mf105_s53922	mf105_s66816	mf105_s71884
1981	mf105_rep_c1984	mf105_s62340	mf105_s66740	mf105_s75553
1982	mf105_rep_c1985	mf105_rep_c10201	mf105_rep_c32374	mf105_s48528	mf105_s61883	mf105_s70565
1983	mf105_rep_c1986	mf105_rep_c43051
1985	mf105_rep_c1988	mf105_s50785	mf105_s51819
1986	mf105_rep_c1989	mf105_s65106	mf105_s67358
1987	mf105_rep_c1990	mf105_s71618
1988	mf105_rep_c1991	mf105_s58505	mf105_s63356
1990	mf105_rep_c1993	mf105_rep_c27129	mf105_s60614	mf105_s74795
1991	mf105_rep_c1994	mf105_s53064	mf105_s64562
1992	mf105_rep_c1995	mf105_rep_c15684	mf105_rep_c38389	mf105_s74840
1993	mf105_rep_c1996	mf105_s57232
1994	mf105_rep_c1997	mf105_s43836	mf105_s49982	mf105_s56782	mf105_s58916	mf105_s66968	mf105_s75328
1995	mf105_rep_c1998	mf105_s63006
1996	mf105_rep_c1999	mf105_s57358
1997	mf105_rep_c2000	mf105_rep_c17921	mf105_rep_c30684	mf105_s51221	mf105_s51622	mf105_s54244	mf105_s57167	mf105_s61580	mf105_s65028	mf105_s66134	mf105_s67529	mf105_s68572
1998	mf105_rep_c2001	mf105_s64475
1999	mf105_rep_c2002	mf105_rep_c27377	mf105_rep_c35337
2000	mf105_rep_c2003	mf105_s48700	mf105_s50923	mf105_s51936	mf105_s61024	mf105_s72192
2001	mf105_rep_c2004	mf105_s53398	mf105_s60045	mf105_s75260
2003	mf105_rep_c2006	mf105_rep_c11934	mf105_c47615	mf105_s58175	mf105_s60322
2004	mf105_rep_c2007	mf105_rep_c19967	mf105_s48459	mf105_s70509
2005	mf105_rep_c2008	mf105_rep_c39414	mf105_s63891	mf105_s72921
2006	mf105_rep_c2009	mf105_s53857	mf105_s59935	mf105_s63586	mf105_s75473
2008	mf105_rep_c2011	mf105_s65100	mf105_s65988
2009	mf105_rep_c2012	mf105_s58431	mf105_s61807
2010	mf105_rep_c2013	mf105_s56922	mf105_s65435
2011	mf105_rep_c2014	mf105_s58200	mf105_s66062
2012	mf105_rep_c2015	mf105_rep_c26287	mf105_rep_c31983
2013	mf105_rep_c2016	mf105_s68541
2014	mf105_rep_c2017	mf105_s69835	mf105_s70295	mf105_s74519
2015	mf105_rep_c2018	mf105_s56619	mf105_s66778
2016	mf105_rep_c2019	mf105_rep_c32729
2017	mf105_rep_c2020	mf105_s59268	mf105_s61160	mf105_s61969	mf105_s75483
2018	mf105_rep_c2021	mf105_s76278
2020	mf105_rep_c2023	mf105_s54516	mf105_s60486
2021	mf105_rep_c2024	mf105_s51691	mf105_s58362
2022	mf105_rep_c2025	mf105_rep_c21257	mf105_s51150	mf105_s69124
2023	mf105_rep_c2026	mf105_rep_c30421
2025	mf105_rep_c2028	mf105_rep_c33647
2026	mf105_rep_c2029	mf105_s56239	mf105_s58386
2027	mf105_rep_c2031	mf105_s48321	mf105_s69923	mf105_s70810
2028	mf105_rep_c2032	mf105_rep_c32745	mf105_s52754	mf105_s58566	mf105_s63515	mf105_s67658
2029	mf105_rep_c2033	mf105_s66351
2030	mf105_rep_c2034	mf105_rep_c45814
2031	mf105_rep_c2035	mf105_s76275
2032	mf105_rep_c2036	mf105_c35837
2033	mf105_rep_c2037	mf105_rep_c27481	mf105_s59734	mf105_s59887
2034	mf105_rep_c2038	mf105_rep_c32153	mf105_rep_c40345	mf105_rep_c46316	mf105_s59822	mf105_s59882	mf105_s69213
2036	mf105_rep_c2040	mf105_rep_c44366
2037	mf105_rep_c2041	mf105_s66017	mf105_s74574
2038	mf105_rep_c2042	mf105_s59246
2040	mf105_rep_c2044	mf105_rep_c7714	mf105_s54498
2041	mf105_rep_c2045	mf105_s75528
2042	mf105_rep_c2046	mf105_s55717
2043	mf105_rep_c2047	mf105_s52107	mf105_s59449
2045	mf105_rep_c2049	mf105_rep_c39495	mf105_s65995	mf105_s68760
2046	mf105_rep_c2050	mf105_s75684
2047	mf105_rep_c2051	mf105_rep_c38918	mf105_s54341
2048	mf105_rep_c2052	mf105_s66861	mf105_s67909
2049	mf105_rep_c2053	mf105_s65956	mf105_s70662
2050	mf105_rep_c2054	mf105_s49898
2051	mf105_rep_c2055	mf105_rep_c23925
2052	mf105_rep_c2056	mf105_rep_c40013	mf105_s55107
2053	mf105_rep_c2057	mf105_rep_c36477
2054	mf105_rep_c2058	mf105_rep_c41405	mf105_s50603	mf105_s51935	mf105_s52025	mf105_s52492	mf105_s54017	mf105_s67180	mf105_s70114	mf105_s73425	mf105_s75863
2055	mf105_rep_c2059	mf105_c26558	mf105_rep_c41423	mf105_rep_c42159
2056	mf105_rep_c2060	mf105_rep_c51186	mf105_rep_c51939	mf105_s56369	mf105_s66577
2057	mf105_rep_c2061	mf105_s51095	mf105_s64849	mf105_s67847
2058	mf105_rep_c2062	mf105_s75759
2059	mf105_rep_c2063	mf105_rep_c37615	mf105_s69986	mf105_s71919
2060	mf105_rep_c2064	mf105_rep_c45953	mf105_s60632
2062	mf105_rep_c2066	mf105_rep_c32236	mf105_s55608	mf105_s57315
2063	mf105_rep_c2067	mf105_rep_c45519	mf105_s75179
2065	mf105_rep_c2069	mf105_s51261	mf105_s51523
2066	mf105_rep_c2070	mf105_s53781	mf105_s54042	mf105_s75489	mf105_s75743
2068	mf105_rep_c2072	mf105_s74728
2070	mf105_rep_c2074	mf105_s52164	mf105_s64085
2071	mf105_rep_c2075	mf105_rep_c44305	mf105_s56612	mf105_s66008
2072	mf105_rep_c2076	mf105_s55965
2073	mf105_rep_c2077	mf105_s67339
2074	mf105_rep_c2078	mf105_s72389
2075	mf105_rep_c2079	mf105_rep_c40217	mf105_rep_c46454	mf105_rep_c46965
2076	mf105_rep_c2080	mf105_rep_c44730	mf105_s75077
2077	mf105_rep_c2081	mf105_rep_c35769	mf105_s58119	mf105_s69451	mf105_s69776
2078	mf105_rep_c2082	mf105_rep_c38302	mf105_s68145
2082	mf105_rep_c2086	mf105_s62369
2083	mf105_rep_c2087	mf105_rep_c31597	mf105_s56194
2084	mf105_rep_c2088	mf105_s57266	mf105_s66051
2085	mf105_rep_c2089	mf105_rep_c24305	mf105_s68461
2086	mf105_rep_c2090	mf105_s64940
2087	mf105_rep_c2091	mf105_rep_c27153	mf105_s72160
2088	mf105_rep_c2092	mf105_s75467
2089	mf105_rep_c2093	mf105_s60289	mf105_s64915	mf105_s69519
2090	mf105_rep_c2094	mf105_rep_c48205
2091	mf105_rep_c2095	mf105_s49417	mf105_s52000	mf105_s54402	mf105_s59944
2092	mf105_rep_c2096	mf105_s75275
2093	mf105_rep_c2097	mf105_s74550
2094	mf105_rep_c2098	mf105_rep_c47494
2095	mf105_rep_c2099	mf105_s52598	mf105_s57472	mf105_s61139	mf105_s70982
2096	mf105_rep_c2100	mf105_s66859	mf105_s67815
2097	mf105_rep_c2101	mf105_s60677	mf105_s67931
2099	mf105_rep_c2103	mf105_rep_c20918	mf105_s50817	mf105_s56211	mf105_s59254
2100	mf105_rep_c2104	mf105_s69671
2101	mf105_rep_c2105	mf105_s52748
2102	mf105_rep_c2106	mf105_s49145
2103	mf105_rep_c2107	mf105_rep_c46426	mf105_s52376	mf105_s55442	mf105_s62459
2104	mf105_rep_c2108	mf105_rep_c31496	mf105_rep_c36238	mf105_rep_c47027	mf105_s69049
2105	mf105_rep_c2109	mf105_s49851	mf105_s57581
2106	mf105_rep_c2110	mf105_rep_c8650	mf105_s49913	mf105_s63237
2107	mf105_rep_c2111	mf105_rep_c42625	mf105_s50176	mf105_s60352
2108	mf105_rep_c2112	mf105_s71973	mf105_s75068
2109	mf105_rep_c2113	mf105_s63814
2110	mf105_rep_c2114	mf105_rep_c47751
2111	mf105_rep_c2115	mf105_s57543	mf105_s62049
2112	mf105_rep_c2116	mf105_c45906
2113	mf105_rep_c2117	mf105_s61091	mf105_s67256
2115	mf105_rep_c2119	mf105_rep_c28869	mf105_rep_c29192	mf105_s57868	mf105_s73139
2116	mf105_rep_c2120	mf105_s57487
2117	mf105_rep_c2121	mf105_s68260
2119	mf105_rep_c2123	mf105_s67121
2120	mf105_rep_c2124	mf105_s55220	mf105_s60925	mf105_s63708
2121	mf105_rep_c2125	mf105_s61381	mf105_s68957
2122	mf105_rep_c2126	mf105_s48678	mf105_s48847	mf105_s62276
2123	mf105_rep_c2127	mf105_rep_c26354	mf105_rep_c44789	mf105_s55421
2124	mf105_rep_c2128	mf105_s68290
2125	mf105_rep_c2129	mf105_rep_c44209
2126	mf105_rep_c2130	mf105_rep_c29758
2128	mf105_rep_c2132	mf105_s49302	mf105_s55817	mf105_s70851
2129	mf105_rep_c2133	mf105_s49292	mf105_s49566	mf105_s72595
2130	mf105_rep_c2134	mf105_s58079	mf105_s58999	mf105_s64991	mf105_s75561
2132	mf105_rep_c2136	mf105_s64407	mf105_s64424
2133	mf105_rep_c2137	mf105_s63178
2134	mf105_rep_c2138	mf105_s76136
2135	mf105_rep_c2139	mf105_rep_c34219
2136	mf105_rep_c2140	mf105_rep_c47342	mf105_s52579	mf105_s61820	mf105_s63634
2137	mf105_rep_c2141	mf105_s50576
2138	mf105_rep_c2142	mf105_rep_c43493	mf105_s64134	mf105_s76125
2139	mf105_rep_c2143	mf105_rep_c45389	mf105_rep_c47813
2140	mf105_rep_c2144	mf105_rep_c24553	mf105_rep_c34586	mf105_rep_c50435	mf105_rep_c51468	mf105_rep_c51994	mf105_rep_c52732	mf105_rep_c52904	mf105_s56174	mf105_rep_c56417	mf105_s69775
2141	mf105_rep_c2145	mf105_s68469	mf105_s72854
2142	mf105_rep_c2146	mf105_rep_c51065	mf105_s74551
2143	mf105_rep_c2147	mf105_rep_c45635
2144	mf105_rep_c2148	mf105_rep_c29575	mf105_rep_c41853	mf105_rep_c44582	mf105_rep_c47552	mf105_s54132	mf105_s56126	mf105_s62395
2145	mf105_rep_c2149	mf105_rep_c16538	mf105_s73152
2146	mf105_rep_c2150	mf105_s52803	mf105_s68268
2149	mf105_rep_c2153	mf105_s49943	mf105_s71990
2150	mf105_rep_c2154	mf105_s58020	mf105_s72360
2151	mf105_rep_c2155	mf105_s71436
2152	mf105_rep_c2156	mf105_s56645
2153	mf105_rep_c2157	mf105_rep_c10145	mf105_c47843	mf105_rep_c55890	mf105_s64875	mf105_s65419	mf105_s74661
2154	mf105_rep_c2158	mf105_s58515	mf105_s60130	mf105_s64753
2155	mf105_rep_c2159	mf105_s70388
2156	mf105_rep_c2160	mf105_s56491	mf105_s58232	mf105_s68381
2158	mf105_rep_c2162	mf105_s74092	mf105_s75720
2159	mf105_rep_c2163	mf105_rep_c46161	mf105_s53379	mf105_s59123	mf105_s68175
2161	mf105_rep_c2165	mf105_rep_c26318	mf105_rep_c31765	mf105_rep_c34495	mf105_s59974	mf105_s66410	mf105_s67322
2162	mf105_rep_c2166	mf105_s57496
2163	mf105_rep_c2167	mf105_s51910
2164	mf105_rep_c2168	mf105_rep_c43199	mf105_s52386	mf105_s73370
2165	mf105_rep_c2169	mf105_s65814	mf105_s74576
2166	mf105_rep_c2170	mf105_rep_c48001
2167	mf105_rep_c2171	mf105_s74012
2168	mf105_rep_c2172	mf105_rep_c44303	mf105_s60182
2169	mf105_rep_c2173	mf105_rep_c52409
2171	mf105_rep_c2175	mf105_rep_c36482	mf105_c48065
2172	mf105_rep_c2176	mf105_s74147
2173	mf105_rep_c2177	mf105_s49790
2175	mf105_rep_c2179	mf105_rep_c22236
2177	mf105_rep_c2181	mf105_rep_c26106	mf105_rep_c30788	mf105_rep_c34565	mf105_s52241	mf105_s53534	mf105_s66767
2178	mf105_rep_c2182	mf105_s55093	mf105_s59998	mf105_s65142	mf105_s74895
2179	mf105_rep_c2183	mf105_rep_c30419	mf105_s51497
2180	mf105_rep_c2184	mf105_s72345
2181	mf105_rep_c2185	mf105_s63077	mf105_s74946
2182	mf105_rep_c2186	mf105_rep_c33367	mf105_rep_c48054	mf105_s61973	mf105_s69513
2183	mf105_rep_c2187	mf105_rep_c54609
2184	mf105_rep_c2188	mf105_s48890	mf105_s51843	mf105_s56728	mf105_s68069
2185	mf105_rep_c2189	mf105_s59251	mf105_s70775
2186	mf105_rep_c2190	mf105_s53554	mf105_s63609
2187	mf105_rep_c2191	mf105_s63522	mf105_s66663	mf105_s68040
2188	mf105_rep_c2192	mf105_s70762
2189	mf105_rep_c2193	mf105_s57062
2190	mf105_rep_c2194	mf105_rep_c44412
2191	mf105_rep_c2195	mf105_s51147	mf105_s62029
2192	mf105_rep_c2196	mf105_rep_c24603
2193	mf105_rep_c2197	mf105_s50694	mf105_s54254
2194	mf105_rep_c2198	mf105_rep_c34061	mf105_s49757	mf105_s57529
2195	mf105_rep_c2199	mf105_s60111	mf105_s64460
2196	mf105_rep_c2200	mf105_rep_c28220	mf105_s53418	mf105_s75292
2197	mf105_rep_c2201	mf105_rep_c56316
2199	mf105_rep_c2203	mf105_s62095
2200	mf105_rep_c2204	mf105_s66387	mf105_s70990
2201	mf105_rep_c2205	mf105_s65677
2202	mf105_rep_c2206	mf105_c43552	mf105_rep_c45276	mf105_s59294
2203	mf105_rep_c2207	mf105_rep_c15693	mf105_c22632	mf105_rep_c28699	mf105_s53656
2204	mf105_rep_c2208	mf105_s68129
2205	mf105_rep_c2209	mf105_rep_c26239
2206	mf105_rep_c2210	mf105_s48694
2207	mf105_rep_c2211	mf105_s62240
2209	mf105_rep_c2213	mf105_s49381
2210	mf105_rep_c2214	mf105_rep_c43704	mf105_s59853
2211	mf105_rep_c2215	mf105_s73242
2212	mf105_rep_c2216	mf105_s58408
2213	mf105_rep_c2217	mf105_s65042
2214	mf105_rep_c2218	mf105_c47382	mf105_s72518
2215	mf105_rep_c2219	mf105_s49543	mf105_s50654	mf105_s73140
2216	mf105_rep_c2220	mf105_s50123	mf105_s50555	mf105_s60959	mf105_s66457
2217	mf105_rep_c2221	mf105_rep_c30599	mf105_s49006
2218	mf105_rep_c2222	mf105_rep_c44063
2219	mf105_rep_c2223	mf105_s51536	mf105_s66978	mf105_s75510
2220	mf105_rep_c2224	mf105_s61078	mf105_s71749
2222	mf105_rep_c2226	mf105_s70499
2223	mf105_rep_c2227	mf105_rep_c22037	mf105_s54908	mf105_s56725	mf105_s65262
2224	mf105_rep_c2228	mf105_rep_c30395
2225	mf105_rep_c2229	mf105_s61942
2226	mf105_rep_c2230	mf105_s69584
2227	mf105_rep_c2231	mf105_s51470
2228	mf105_rep_c2232	mf105_s53684	mf105_s74324
2229	mf105_rep_c2233	mf105_s58557	mf105_s74670
2231	mf105_rep_c2235	mf105_s56745	mf105_s69001
2232	mf105_rep_c2236	mf105_s52292	mf105_s62957
2233	mf105_rep_c2237	mf105_s61523	mf105_s68391
2234	mf105_rep_c2238	mf105_rep_c44911	mf105_s58091
2235	mf105_rep_c2239	mf105_rep_c30889	mf105_rep_c44591	mf105_s74405
2236	mf105_rep_c2240	mf105_rep_c43127	mf105_s69760
2238	mf105_rep_c2242	mf105_s48477	mf105_s66708
2240	mf105_rep_c2244	mf105_s55669	mf105_s58143
2241	mf105_rep_c2245	mf105_s73240
2242	mf105_rep_c2246	mf105_rep_c29539	mf105_s52558
2244	mf105_rep_c2248	mf105_s75719
2245	mf105_rep_c2249	mf105_s62109
2246	mf105_rep_c2250	mf105_rep_c43904	mf105_s62676	mf105_s63039
2248	mf105_rep_c2252	mf105_s55581	mf105_s57615
2250	mf105_rep_c2254	mf105_rep_c42914
2252	mf105_rep_c2256	mf105_s60868
2253	mf105_rep_c2257	mf105_s71206
[truncated: 9,407 more rows]
